# Supplementary material
Source: PubMed Central journal article supplement (PMC10200757)
Supplement: NIHMS1873107-supplement-1.pdf [file NIHMS1873107-supplement-1.pdf]

## Mice

Other mouse lines used included *Sox2-CreERT* (Cat# 017593), *Sox9-CreERT* (Cat# 035092), *Kras(LoxP-G12D)* (Cat# 019104), *Sox9<sup>fl/fl</sup>* (Cat# 013106), *Rosa26-LoxP-TdTomato* (Cat# 007914), *Rosa26-Frt-STOP-Frt-GFP* (Cat# 32038), *Kras(Frt-STOP-Frt-G12D)* (Cat# 023590) were purchased from Jackson Laboratories. *P53<sup>R172H</sup>* mice which ubiquitously expressed mutated *p53* were kindly provided by Dr. Kenneth Olive (Columbia University). The obtained transgenic mice were maintained on a C57BL/6 and 129SvEv mixed background. For the entire experiments, adult mice without sex-bias at a minimum age of 6–8 weeks were used. Each individual mouse was injected intraperitoneally with tamoxifen (Tmx) (Cat# T5648, Sigma-Aldrich) that was dissolved in sunflower oil at the designated timepoints. Samples were then collected for analysis.

## Cell lines

NCI-N87, KATOIII and AGS gastric cancer cell lines were obtained from the American Type Culture Collection (ATCC, Rockville, MD, USA). The identity of these cell lines were characterized by morphology, karyotyping, and PCR to rule out interspecies and intraspecies contamination. N87 cell were cultured in RPMI-1640 medium (Gibco, Carlsbad, CA, USA), KATOIII cell were cultured in DMEM medium and AGS cell were cultured in DMEM-F12 medium (Gibco, Carlsbad, CA, USA) containing 10% fetal calf serum (Gibco, Carlsbad, CA, USA) and penicillin/streptomycin (Gibco, Carlsbad, CA, USA). All cell lines were cultured in an incubator (Senta, China) at 37°C with 5% CO<sub>2</sub> and 95% air. The media were changed every two days.

## Human tissue microarray

A total of 244 paraffin-embedded samples of GC and adjacent normal tissues were collected from 2010 to 2015 at Fujian Medical University Union Hospital and used for immunohistochemistry. The inclusion criteria were as follows: (1) histological identification of GC; (2) absence of combined malignancies and distant metastases; (3) availability of complete follow-up data; and (4) initial or updated tumor stage classification performed according to the 7<sup>th</sup> edition of The American Joint Committee on Cancer (AJCC) cancer staging manual<sup>1</sup>. Recurrence was defined as the presence of a biopsy-documented tumor or imaging features and was categorized according to the

location. The present study was approved by the ethics committee of Fujian Medical University Union Hospital (No. 2020KY0150), and written consent was obtained from all enrolled patients.

### **Establishment of 3D organoid cultures**

Normal mouse gastric- or human GC cell-derived organoids were processed using a previously published protocol <sup>2-4</sup>. In brief, to develop normal mouse gastric organoid, normal tissues were washed with PBS containing 1x Penicillin/Streptomycin (P/S) twice (Cat#15140122, Thermo Fisher Scientific), followed by removing the muscle layer and mucus using scissors. Normal tissues were then cut into 1-3mm<sup>2</sup> pieces and incubated in PBS buffer containing 10mM EDTA (Cat#15140122, Thermo Fisher Scientific), 0.5mM DL-dithiothreitol (Cat# D9779, Sigma-Aldrich), 1x P/S and 1mg/ul Primocin (Cat#ant-pm-1, InvivoGen), at 4°C for 45min. Tissue pieces were then carefully transferred to a sterile 10cm dish and gastric glands were released by pressing the tissues using a glass-slide. Detached gastric glands were washed twice with PBS, followed by centrifugation at 200 g for 5min and re-suspended with Matrigel. 200ml of Matrigel-cell mixture was then added to each well of a pre-warmed 24-well plate. After the mixture solidified, 1ml of standard gastric organoid medium [advanced DMEM/F12 (Cat#12634010, Thermo Fisher Scientific), 1x GlutaMax (Cat#35050061, Thermo Fisher Scientific), 1x HEPES (Cat#15630080, Thermo Fisher Scientific), 1x P/S, 50% Wnt3a, 10% RSPO-1, 10% Noggin, 1xB27 (Cat#17504001, Thermo Fisher Scientific), 50ng/mL EGF (Cat#17504001, Thermo Fisher Scientific), 200ng/mL FGF10 (Cat#100-26, Peprotech), 1mM N-Acetylcysteine (Cat#A9165, Sigma-Aldrich), 1nM Gastrin (Cat#G9145, Sigma-Aldrich), 2 mM A83-01 (Cat#2939/10, Tocris), 10 mM Y-27632 (Cat#1254/10, Tocris), and 1 mg/ul primocin were added to each well. Growth factors including Wnt3a, RSPO-1 and Noggin were prepared as conditioned medium for organoid cultures using a previous protocol <sup>5</sup>. Fresh medium was added every 2-3 days. For histological analysis, the organoids were fixed in 4% paraformaldehyde for 1 hour, embedded in 2% agarose gel, or directly fixed in the matrigel with formalin to prepare the paraffin blocks for sectioning and staining.

### **Alcian blue staining**

Alcian blue staining were performed as previously described<sup>6</sup>. Briefly, sections were treated with 3% acetic acid solution for 3 minutes, then stained in Alcian blue (Cat#A3157, Sigma) for 30 minutes and counterstained with Nuclear Fast Red (Cat#N8002, Sigma).

### **Protein isolation and Western blotting**

The cells were extracted in RIPA lysis buffer (CAT#89900, Thermo Fisher Scientific, USA), containing a protease inhibitor cocktail (Sigma-Aldrich, Saint Louis, MO, USA). The lysates were centrifuged at 12,000 rpm (4°C for 15 min) and the protein concentration was quantified using a BCA protein assay kit (Thermo Scientific, Waltham, MA, USA). The following primary antibodies were used: rabbit anti-SOX9 (1:2000, AB5535, Sigma-Aldrich), rabbit anti- $\beta$ -tubulin (1:1,000; AF7011, Affinity Biosciences, Cincinnati, OH, USA), which was used as a control. Signal detection was performed using an ImageQuant LAS 4000 mini-instrument (GE Healthcare, Piscataway, NJ, USA).

### **BrdU pulse-chase and paired-cell assays**

The assays were processed using a previous protocol<sup>7</sup>. In brief, TrypLE Express (Cat#12604013, Thermo Fisher Scientific) was used to dissociate human gastric cancer cell from the organoids to obtain single-cell suspensions. Cells were then cultured for 2 weeks in the presence of 1 $\mu$ M BrdU and the medium containing freshly prepared BrdU was changed every 72h. For BrdU chasing, the cells were washed, seeded on coated coverslips in medium without BrdU, and synchronized through a thymidine–nocodazole–blebbistatin sequence to control cell division for entering second mitosis and paired-cell formation<sup>7-9</sup>. Twenty minutes after releasing from the nocodazole-induced cell cycle arrest, cells were incubated with 50 uM blebbistatin for 60 minutes followed by fixation with 4% paraformaldehyde. We monitored and photographed the phase-contrast and immunofluorescent images of mitotic cells when the two daughter cells were really separated from each other. The cells were sequentially incubated in 1N HCl followed by 2N HCl to open the DNA structure. Immediately after the acid wash, borate buffer (0.1 M, pH=8.0) was used to neutralize cells at room temperature. For fluorescence microscopy, the cells were then washed and incubated with corresponding primary and second antibody. According to the previous studies, if the fluorescent intensity of BrdU in the BrdU high daughter cell was more than 2-fold higher than that in BrdU low daughter cell, we defined this cell division mode as asymmetrical cell division. If the

BrdU intensity difference was less than 1.5-fold, defined this cell division mode as symmetrical cell division<sup>10</sup>. Images were obtained with Leica DMI8 inverted microscope and Zeiss LSM T-PMT confocal laser-scanning microscope.

### Data acquisition and characteristics

The raw and processed data were acquired from The Cancer Genome Atlas (TCGA) (up to April 1, 2021). The TCGA-STAD (The Cancer Genome Atlas stomach adenocarcinoma), GSE13911 and GSE66229 datasets were used in the present study. The TCGA-STAD dataset was downloaded from the Genomic Data Commons (GDC) data portal (<http://portal.gdc.cancer.gov/>), . GSE13911 and GSE66229 datasets were downloaded from the Gene Expression Omnibus (GEO) database (<http://www.ncbi.nlm.nih.gov/geo/>). The mRNA expression data and clinical information were downloaded, and the following samples were excluded: (1) “0” gene expression values and (2) incomplete survival information and pathological characteristics. These processes were performed in R, using “RTCGA Toolbox” R packages. In addition, for TCGA, GSE13911 and GSE66229 datasets, RNA-sequencing data were transformed by  $\log_2(x + 1)$ , and then z-score normalization was performed. Student's t-test was used to compare Sox9 mRNA expression levels between gastric cancer tissues and adjacent tissues.

### Data availability statement

The source of mouse corpus scRNA-seq datasets was from <sup>11</sup>. FASTQ files were downloaded from NCBI (SRP227356). Any additional data are available from the corresponding authors upon request.

### Supplementary Figure Legend

Figure S1. Precancerous and cancer lesion developed in the gastric tissues of Sox2-CreERT; Kras(LSL-G12D) mutants following Kras activation and MNU treatment. Related to Figure 1. (A) Schematic depicts the generation of Sox2-CreERT;Kras(LSL-G12D) mutants. (B) Gross pathological changes in the gastric tissues of Sox2-CreERT;Kras(LSL-G12D) mutants at different time points. Arrow indicates a tumor nodule. (C-E) Histological sections of the gastric tissues stained with hematoxylin and eosin (H&E) and Alcian blue. Note the expansion of mucous metaplasia in Sox2-CreERT;Kras(LSL-G12D) mutants at 45dpi (days post-tamoxifen induction) and 120dpi. (F) Metaplasia progresses over time indicated by GSII and GIF co-immunostaining in the gastric tissues of Sox2-CreERT;Kras(LSL-G12D) mutant mice. (G)

Quantification of GSII+GIF+ cells shown in F (n=7 per group). (H) Schematic diagram for MNU treatment. MNU was given every other week for the first 8 weeks. (I) Macroscopic images and H&E staining of gastric cancer nodules induced by MNU in WT mouse. Circles indicate tumor area. Data are expressed as mean  $\pm$  SD. Statistical analyses used unpaired t-test or one-way ANOVA test. \* $p < 0.05$ ; \*\* $p < 0.01$ ; \*\*\* $p < 0.001$ ; n.s. not significant. Scale bar in B, I (left panel) 5 mm; C, 50  $\mu\text{m}$ ; D-F, I (right panel) 100  $\mu\text{m}$ .

Figure S2. Expansion of Sox9+ cells in the corpus following acute injury and long-term inflammation. Related to Figure 1. (A) UMAP annotation of the integrated cells isolated from the corpus of healthy wildtype mice, mice treated with high doses of tamoxifen (Tmx) and TxA23 transgenic mice. (B) UMAP showing the major cell types in the corpus including the epithelium, endothelium, mesenchyme and immune cells. (C) UMAP showing the expression of the epithelial marker Epcam. (D) UMAP showing the specific epithelial clusters from the three groups. (E) Violin plot showing the expression level of Sox9 in various epithelial clusters. (F) Violin plot indicating increased expression of Sox9 transcripts in the corpus epithelial cells isolated from mice treated with Tmx and TxA23 transgenic mice. (G) UMAP showing the distribution of gastric epithelial cell lineages as indicated by specific marker genes. \*\*\* $p < 0.001$ ; \*\*\*\* $p < 0.0001$ .

Figure S3. Major gastric cell types are present in the lineage labeled organoids derived from Sox9-CreERT;Rosa26Tdtomato mice. Related to Figure 2. Note the presence of Sox2+ and Sox9+ cells, enteroendocrine (ChgA+), pit (Muc5AC+), parietal (HK-ATPase+) and chief cells (Gif+). Scale bars, 100  $\mu\text{m}$ .

Figure S4. Sox2 and Sox9 expression in the gastric tissues and the combined use of Cre-loxp and Flippase (Flp)-Frt systems to circumvent undesired targeting. Related to Figure 2 and 3. (A) H&E staining of the intestine of Sox9-CreERT;Kras(LoxP-G12D) mutants at 120 dpi. Arrows indicate tumor nodules. (B) Schematic depicts the expression pattern of Sox2 and Sox9 in mouse digestive tract. (C) Immunostaining of Sox2 and Sox9 in the human stomach. (D) Lineage tracing shows that Sox2+ cells give rise to Sox9+ cells. (E) Representative images of immunofluorescence of Sox2 and Sox9 in the intestine and esophagus of WT mice. (F) Immunostaining of Sox2, Sox9 and GFP in the intestine and esophagus isolated from Sox2-CreERT;Sox9Flp;R26Frt-STOP-Frt-GFP mutant mice. Note GFP is not expressed in both tissues. Scale bar in A, C, E, F 100  $\mu\text{m}$ ; D, 50  $\mu\text{m}$ .

Figure S5. Rapid and widespread gastric cancer formation in Sox2-CreERT;Sox9Flp; Kras(Frt-STOP-Frt-G12D); P53R172H (SSKP) mutants. Related to Figure 3. (A) H&E and Alcian blue staining of the gastric tissues isolated from SSKP mutants at 90 dpi. Arrows indicate cancer cells. Note Alcian blue staining was performed in a neighboring tissue section. (B) H&E staining

of the gastric tissues of SSKP mutants at 150 dpi. Arrows indicate cancer cells. Note invasive cancer cells in the muscularis, vessels and perigastric lymph node. Also note the presence of signet ring cell carcinoma foci (arrow in the bottom right panel). (C) Alcian blue staining of the gastric tissues isolated from SSKP mutant mice at 150 dpi. (D) H&E staining indicates metastasis in the liver and peritoneal of SSKP mutants at 240dpi. Scale bars, 100  $\mu$ m.

Figure S6. SOX9 is important for gastric carcinogenesis but dispensable for the maintenance of homeostasis. Related to Figure 4. (A) Schematic depicts the generation of Sox2-CreERT;Sox9fl/fl; Rosa26Tdtomato mice. (B) Deletion of Sox9 in Sox2+ cells was confirmed by immunofluorescence staining of the gastric tissues from Sox2-CreERT;Sox9fl/fl;Rosa26Tdtomato mice at 6 dpi. (C) Lineage tracing of the corpus and antrum isolated from Sox2-CreERT; Rosa26Tdtomato mice at 30 dpi. (D) Representative H&E staining of Sox2-CreERT;Sox9fl/fl; Rosa26Tdtomato mice at 30 dpi. (E) Representative lineage-tracing of Sox2-CreERT;Sox9fl/fl; Rosa26Tdtomato mice at 30 and 120 dpi. (F) Co-immunostaining of TdTomato in enteroendocrine cell (ChgA+), tuft cell (Dclk1+), pit cell (Muc5AC+), parietal cell (HK-ATPase+) and chief cell (Gif+) in the gastric tissues of Sox2-CreERT; Sox9fl/fl; Rosa26Tdtomato mice at 120 dpi. Scale bars, 100  $\mu$ m.

Figure S7. Sox9 is essential for the formation of gastric cancer organoid. Related to Figure 4. (A) Deletion of SOX9 in N87, KATOIII and AGS cells with CRISPR/Cas9 was confirmed by Western blotting.  $\beta$ -tubulin serves as a control. (B) Expression of SOX9 in N87, KATOIII and AGS cell lines was confirmed by immunofluorescence. (C) Representative images of control and SOX9 KO KATOIII and AGS-derived organoids. Arrows indicate organoids. (D) H&E staining and immunofluorescence of SOX2, SOX9 and Ki67 in control and SOX9 KO organoids. Scale bars in B, 10  $\mu$ m; C, 1 mm; D, 50  $\mu$ m.

Figure S8. Sox9 deletion reduces symmetric division, however does not affect apoptosis or proliferation in oncogene-expressing cells. Related to Figure 5. (A) Representative images and quantification of apoptotic cells (activated Caspase3+) in the gastric tissues of Sox2-CreERT; Kras(LSL-G12D) mutants with and without Sox9 deletion at different time points (n = 3 per group). Arrows indicate activated Caspase3+ cells. (B) Representative images and quantification of proliferating cells (Ki67 +) in Sox2-CreERT;Kras(LSL-G12D) mutant mice with and without Sox9 deletion at different time points (n = 3 per group). (C) Representative images of mitotic angles of gastric epithelial cells in Sox2-CreERT;Kras(LSL-G12D) mutants with and without Sox9 deletion and SSKP mice at different time points. The basement membrane (BM) is labeled with integrin  $\alpha$ 8 (ITGa8). Data are presented as mean  $\pm$  SD. Statistical analyses used unpaired t-test or one-way ANOVA test. \*p < 0.05; \*\*p < 0.01; \*\*\*p < 0.001; n.s. no significance. Scale bars, 100  $\mu$ m.

Figure S9. Deletion of SOX9 reduces symmetric division in paired-cell assay. Related to Figure 6. Representative images of symmetric and asymmetric division in gastric cancer cells (N87, KATOIII and AGS) assessed by paired-cell assay. Aurora B indicates the mid-body. Scale bars, 5  $\mu\text{m}$ .

## References:

1. Washington K. 7th edition of the AJCC cancer staging manual: stomach. *Annals of surgical oncology* 2010;17:3077-9.
2. Lechler T, Fuchs E. Asymmetric cell divisions promote stratification and differentiation of mammalian skin. *Nature* 2005;437:275-280.
3. Bartfeld S, Bayram T, van de Wetering M, et al. In vitro expansion of human gastric epithelial stem cells and their responses to bacterial infection. *Gastroenterology* 2015;148:126-136. e6.
4. Yan HH, Siu HC, Law S, et al. A comprehensive human gastric cancer organoid biobank captures tumor subtype heterogeneity and enables therapeutic screening. *Cell stem cell* 2018;23:882-897. e11.
5. Miyoshi H, Stappenbeck TS. In vitro expansion and genetic modification of gastrointestinal stem cells in spheroid culture. *Nature protocols* 2013;8:2471-2482.
6. Jiang M, Ku W-Y, Zhou Z, et al. BMP-driven NRF2 activation in esophageal basal cell differentiation and eosinophilic esophagitis. *The Journal of clinical investigation* 2015;125:1557-1568.
7. Hwang W, Jiang J, Yang S, et al. MicroRNA-146a directs the symmetric division of Snail-dominant colorectal cancer stem cells. *Nature cell biology* 2014;16:268-80.
8. Matsui Y, Nakayama Y, Okamoto M, et al. Enrichment of cell populations in metaphase, anaphase, and telophase by synchronization using nocodazole and blebbistatin: a novel method suitable for examining dynamic changes in proteins during mitotic progression. *European journal of cell biology* 2012;91:413-9.
9. Wang K, Wloka C, Bi E. Non-muscle Myosin-II Is Required for the Generation of a Constriction Site for Subsequent Abscission. *iScience* 2019;13:69-81.
10. Zhang K, Guo Y, Wang X, et al. WNT/ $\beta$ -Catenin Directs Self-Renewal Symmetric Cell Division of hTERT Prostate Cancer Stem Cells. *Cancer research* 2017;77:2534-2547.
11. Bockerstett KA, Lewis SA, Wolf KJ, et al. Single-cell transcriptional analyses of spasmolytic polypeptide-expressing metaplasia arising from acute drug injury and chronic inflammation in the stomach. *Gut* 2020;69:1027-1038.

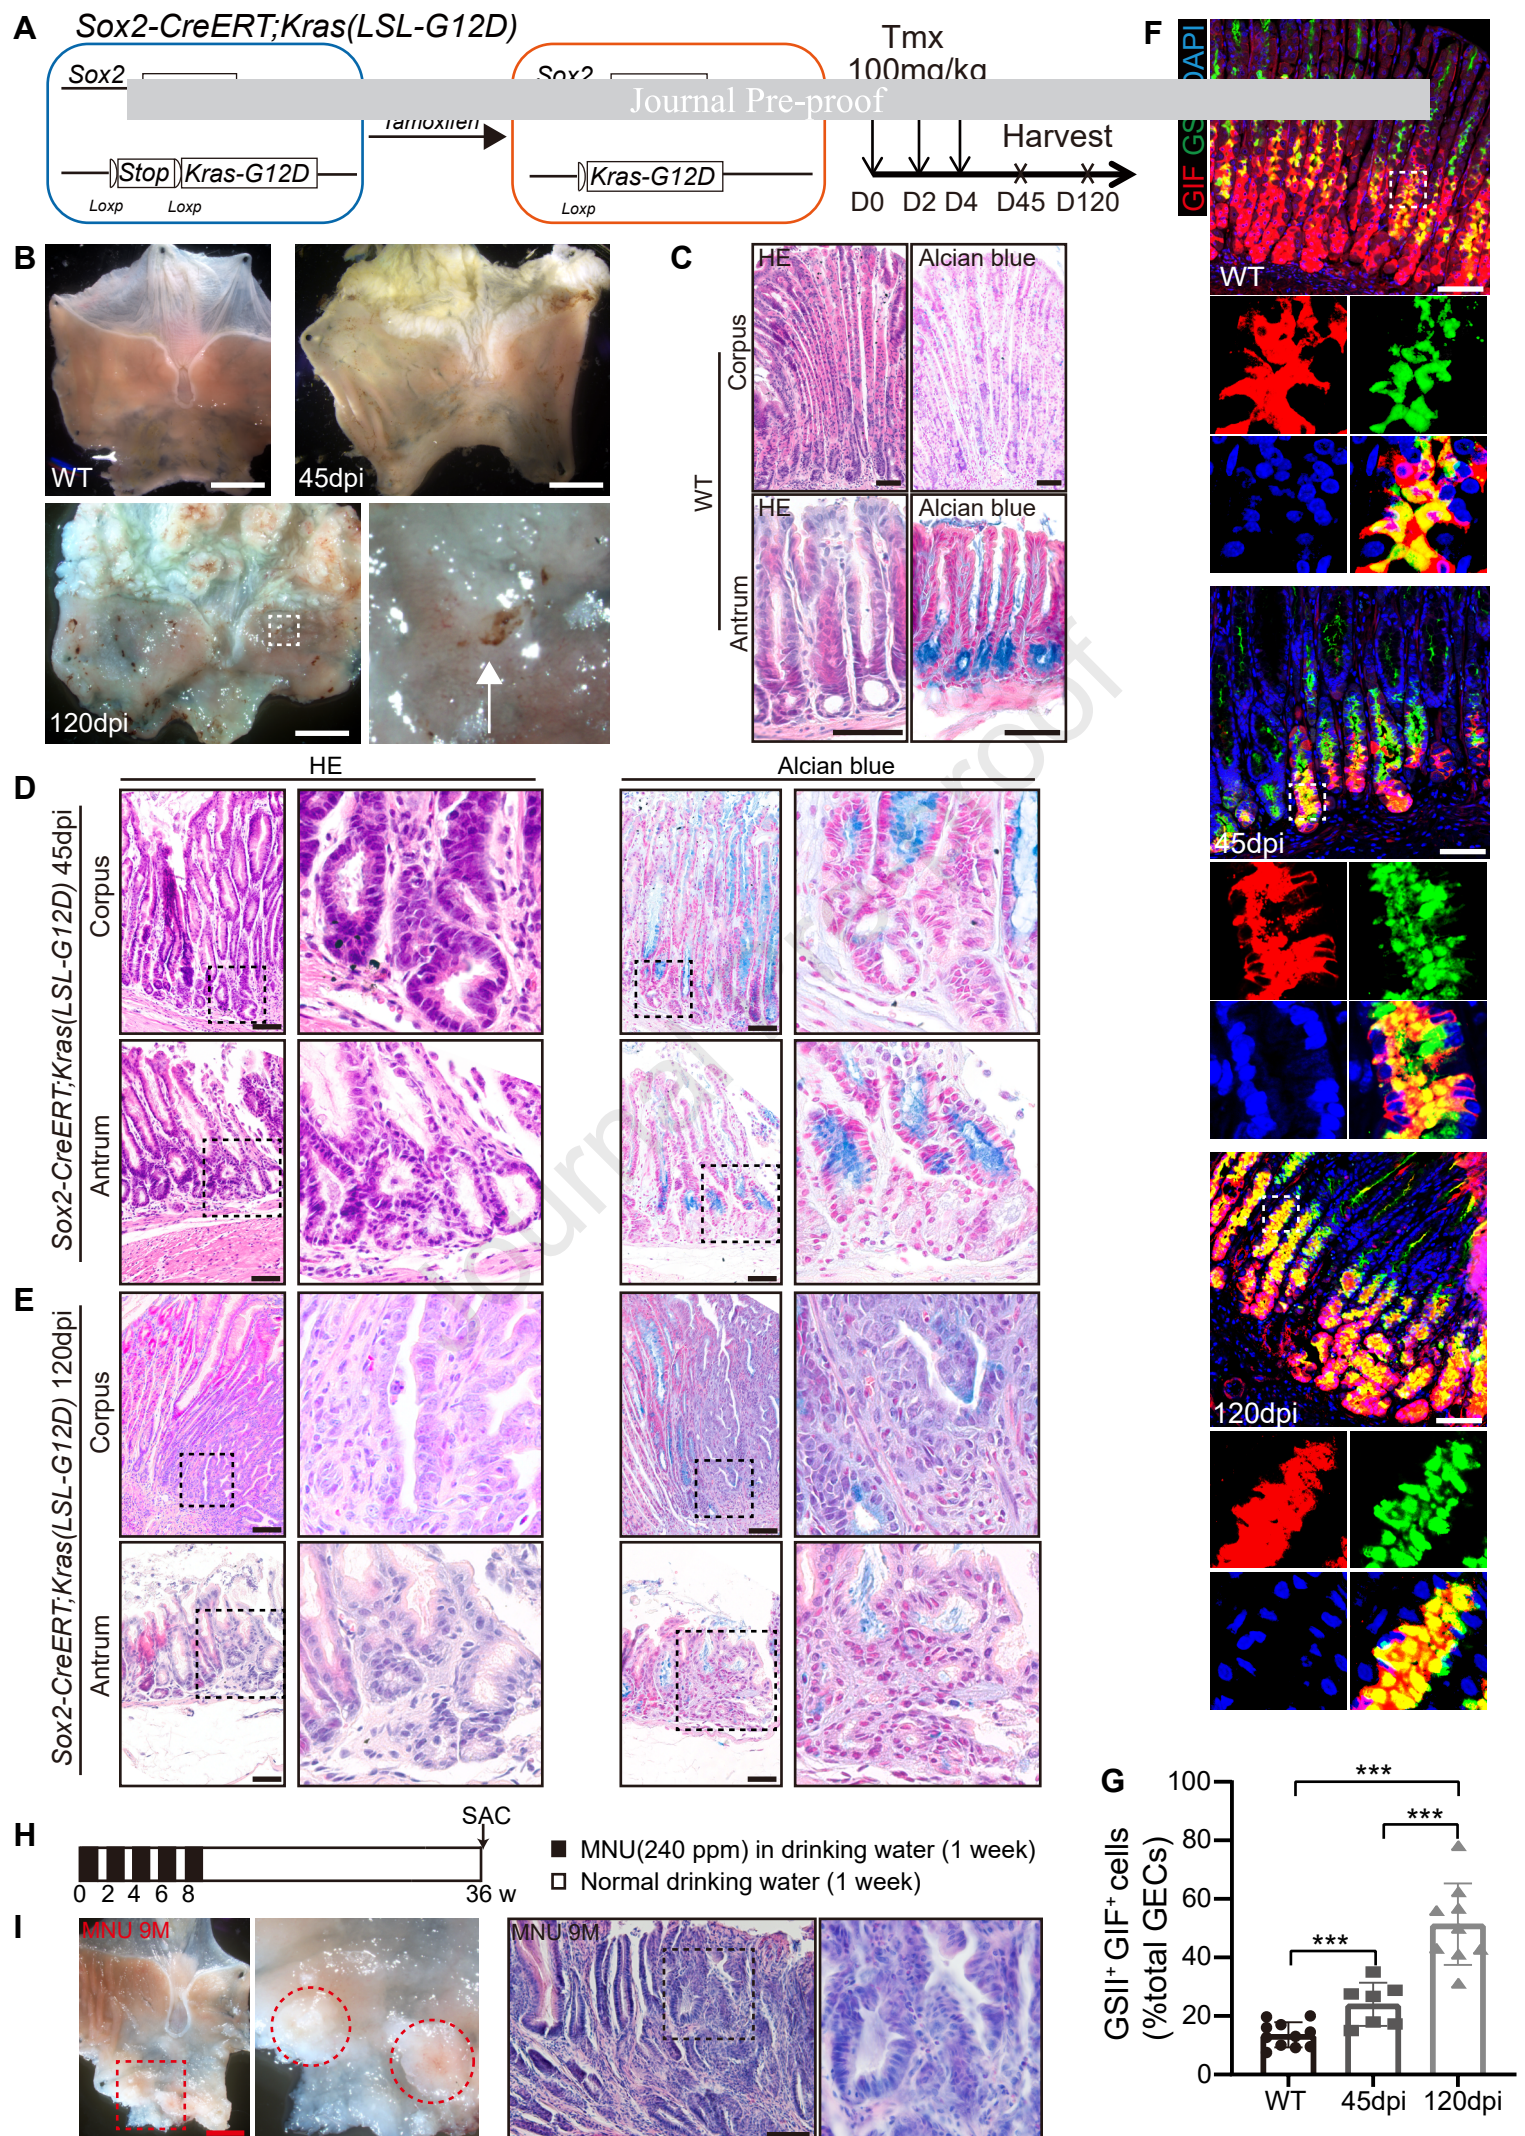



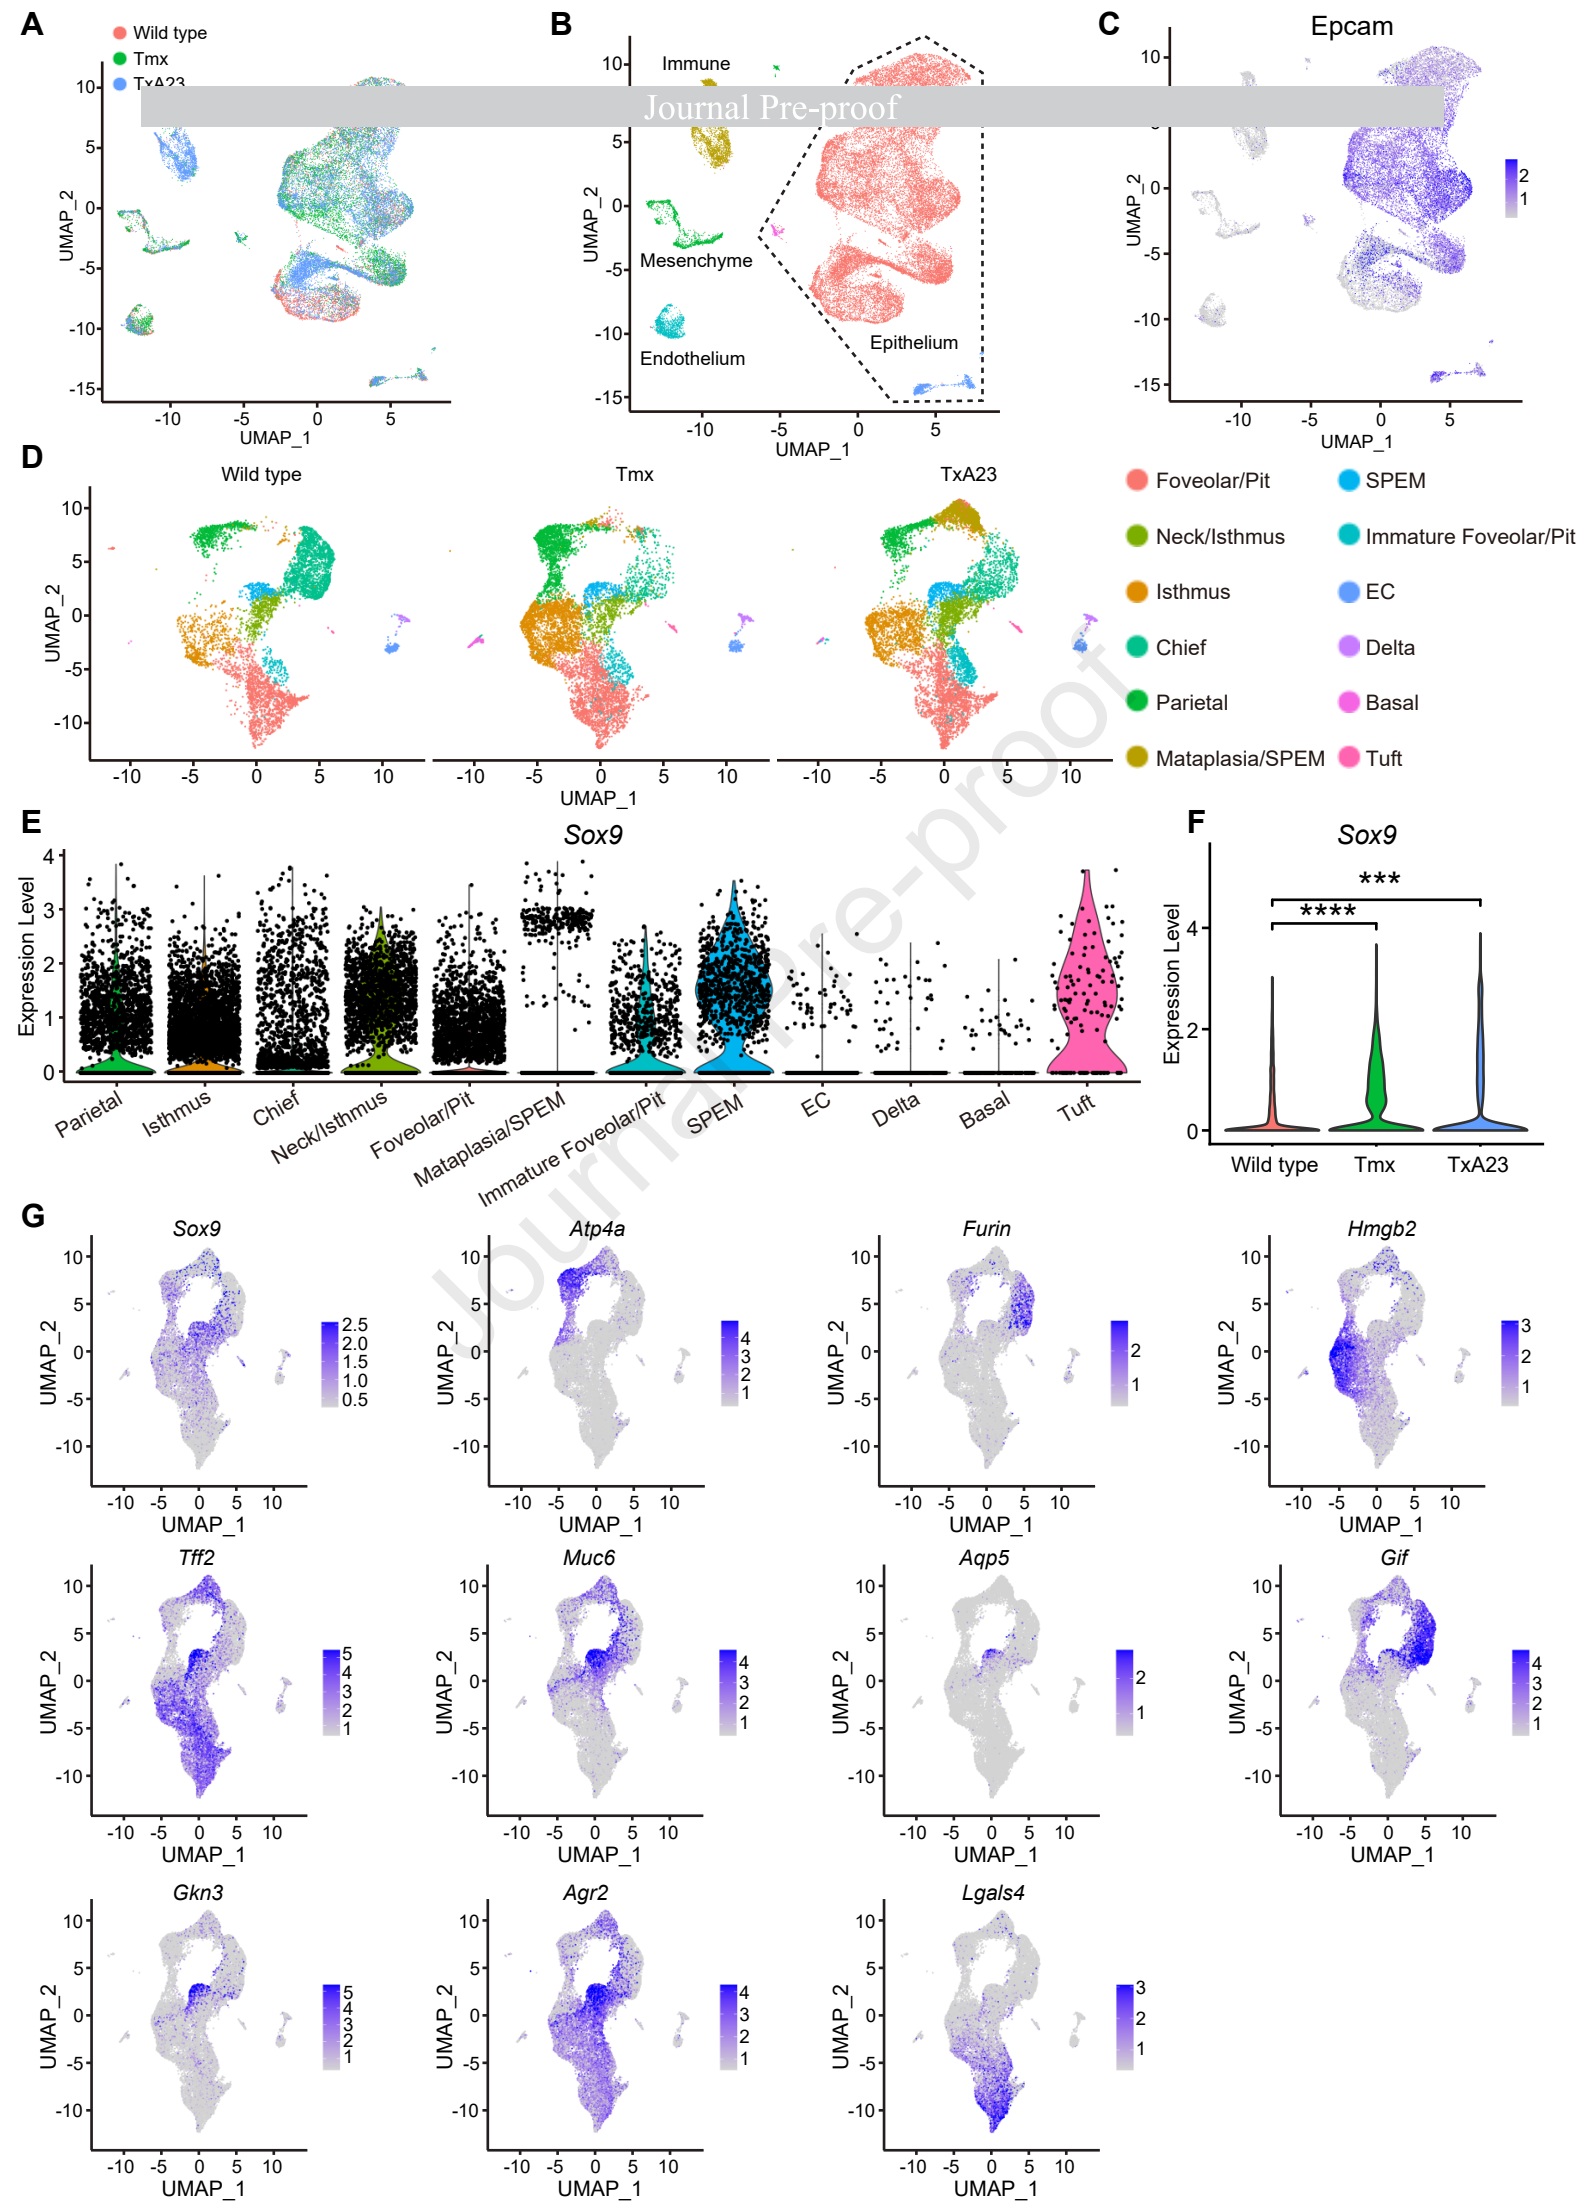

Tdtomato SOX9 Muc5ac DAPI

Tdtomato ChgA SOX2 DAPI

Journal Pre-proof

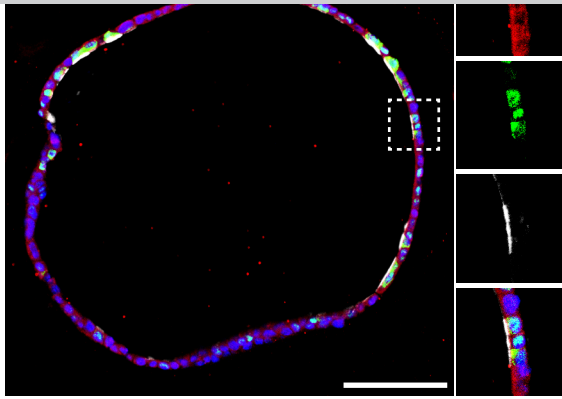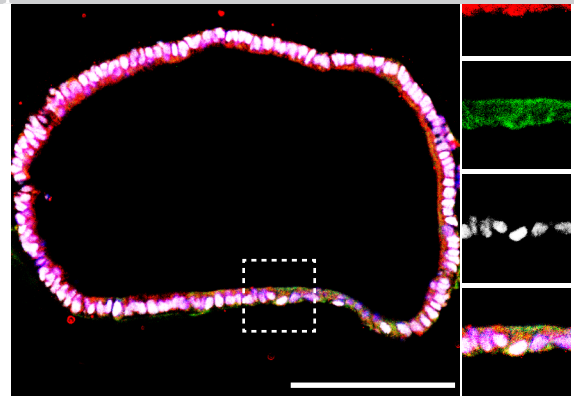

Tdtomato GIF DAPI

Tdtomato HK-ATPase DAPI

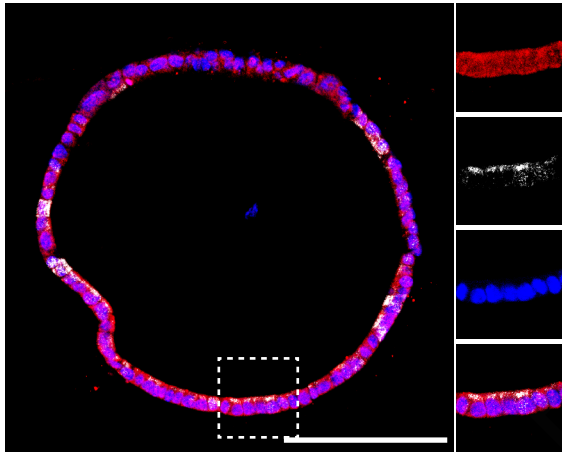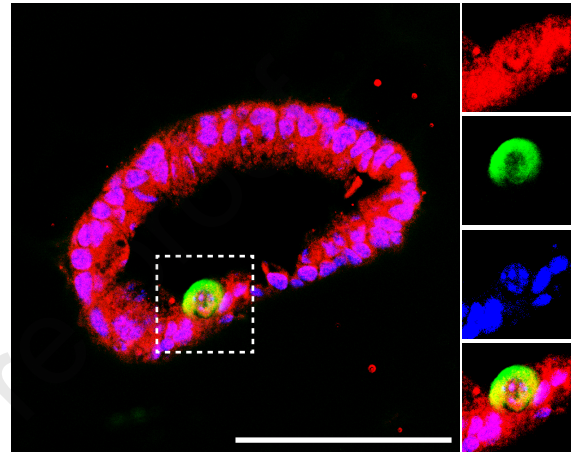

Journal Pre-proof

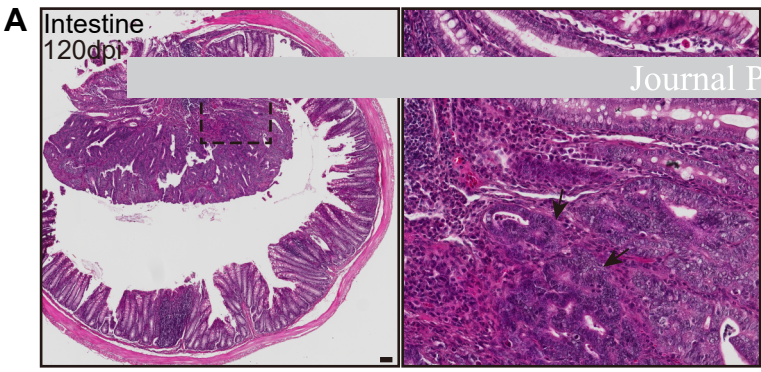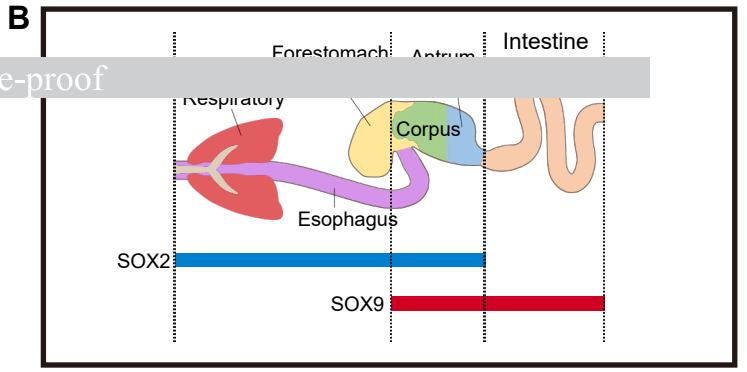

Sox2 and Sox9 expression in mice

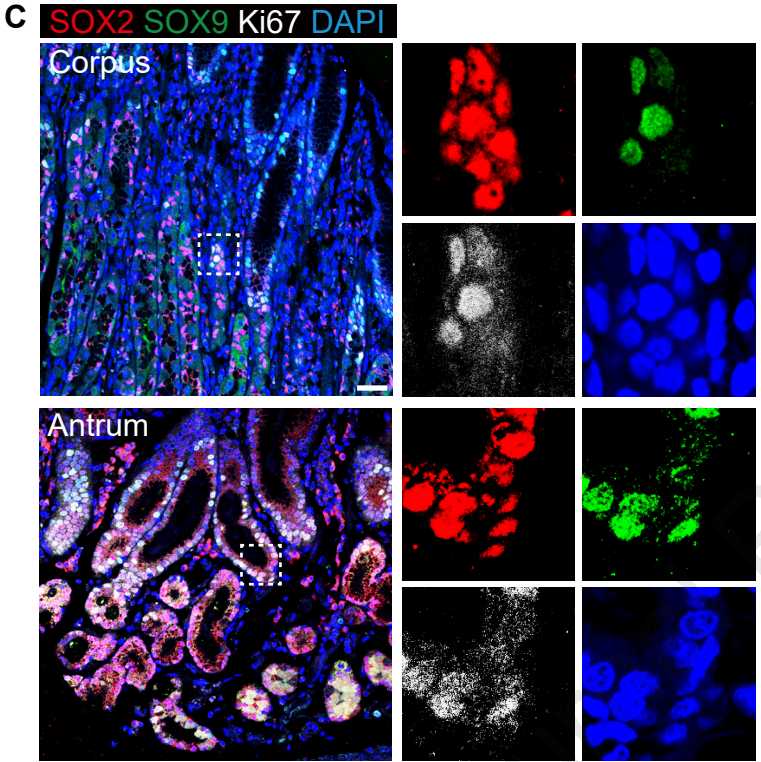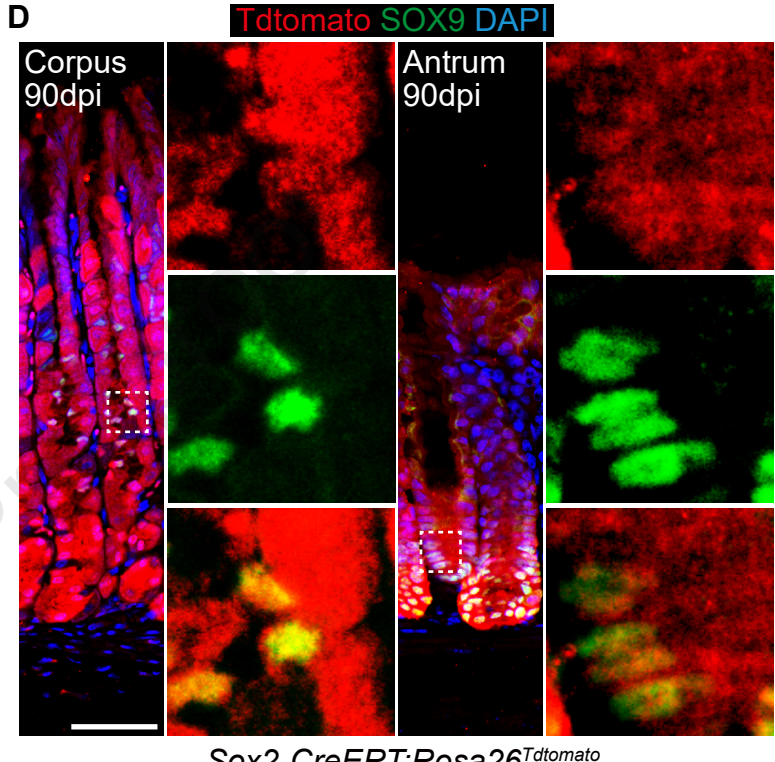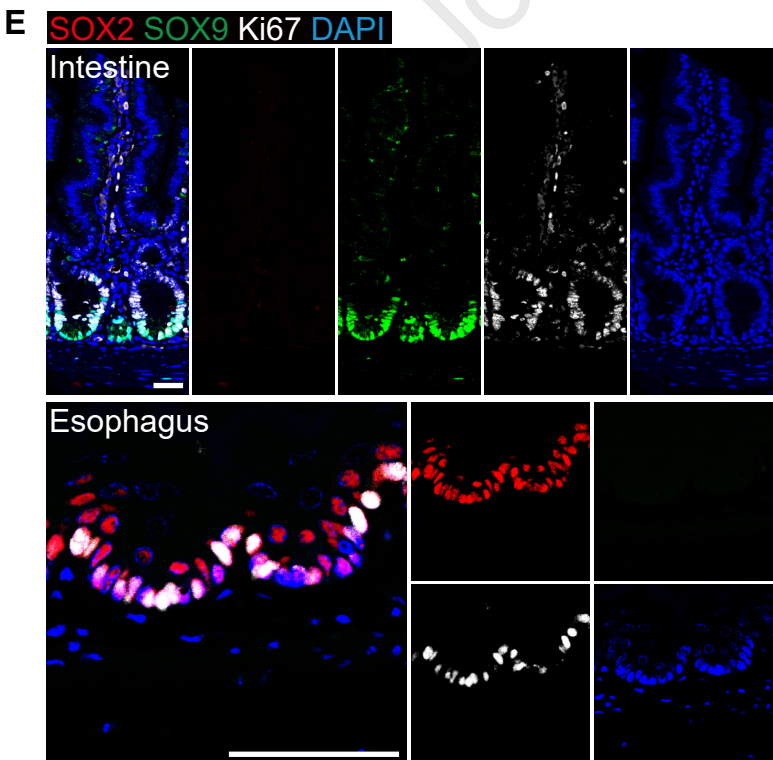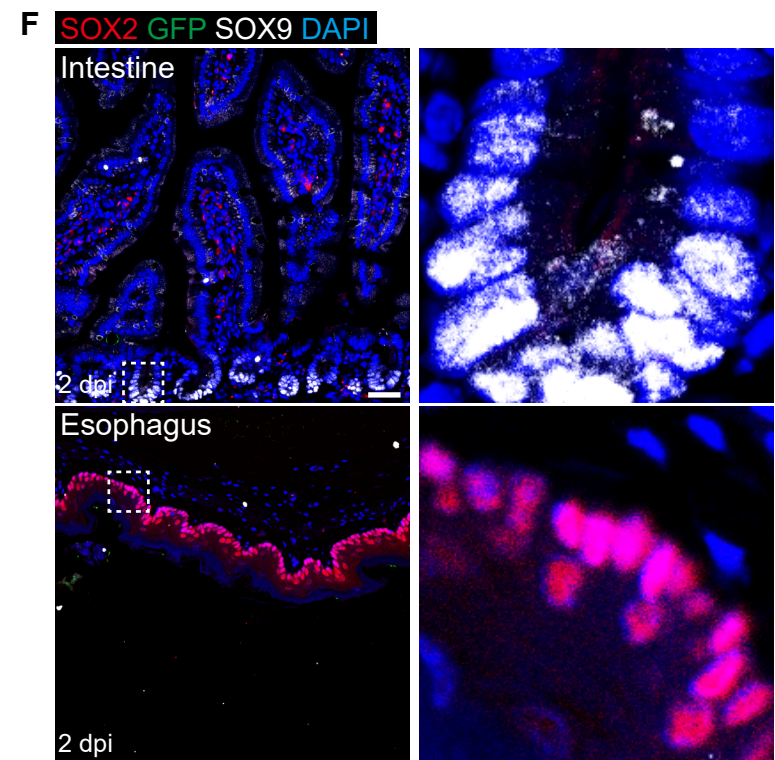

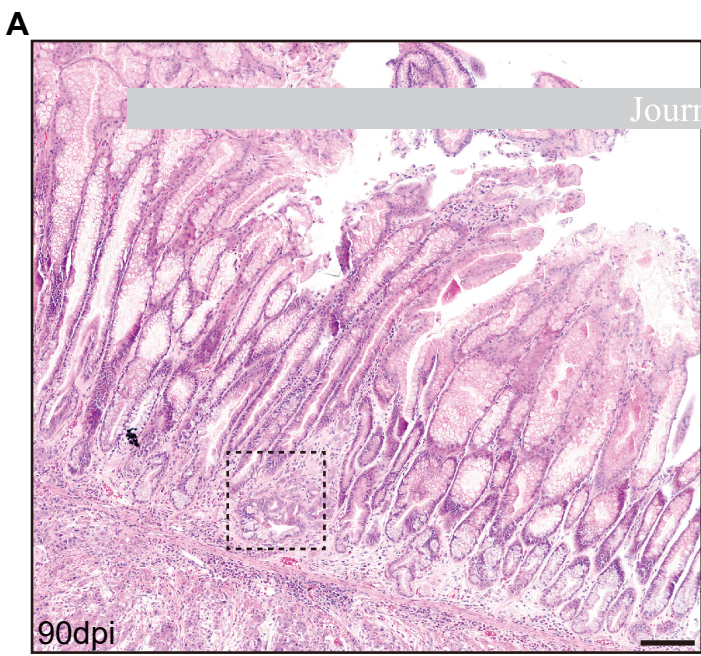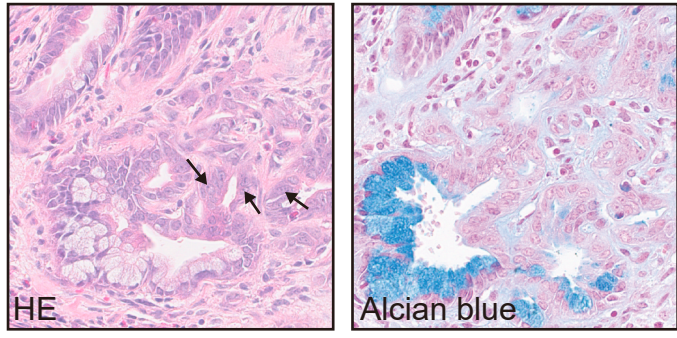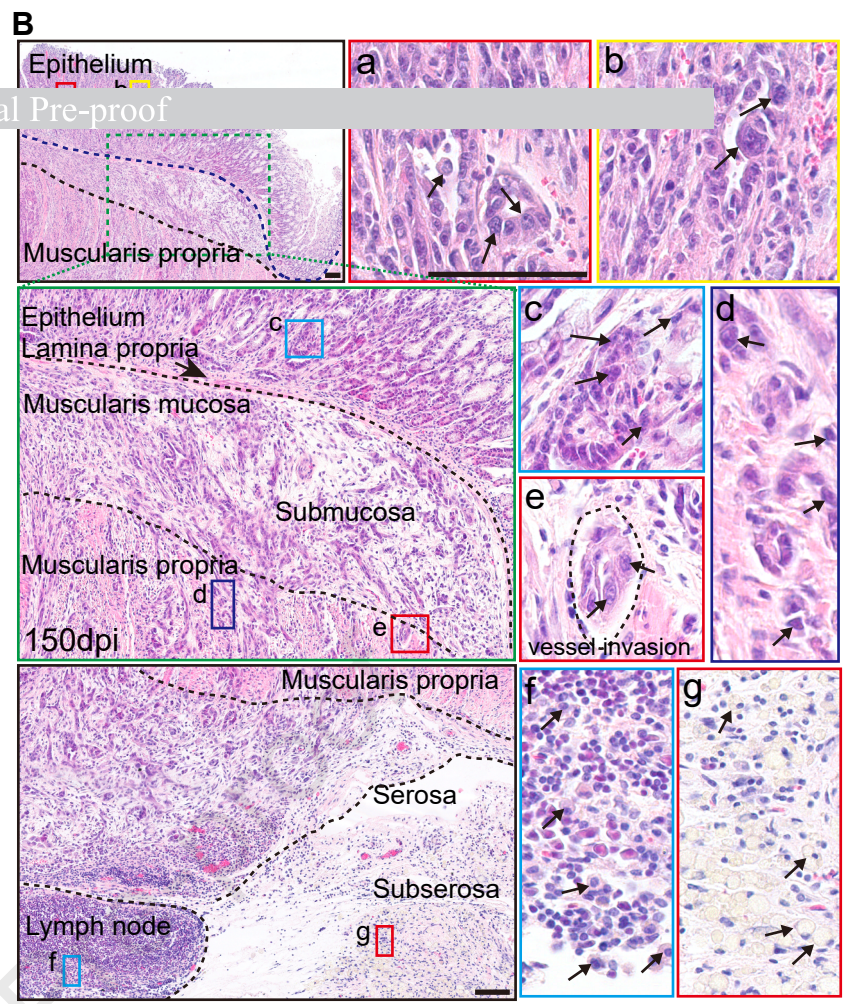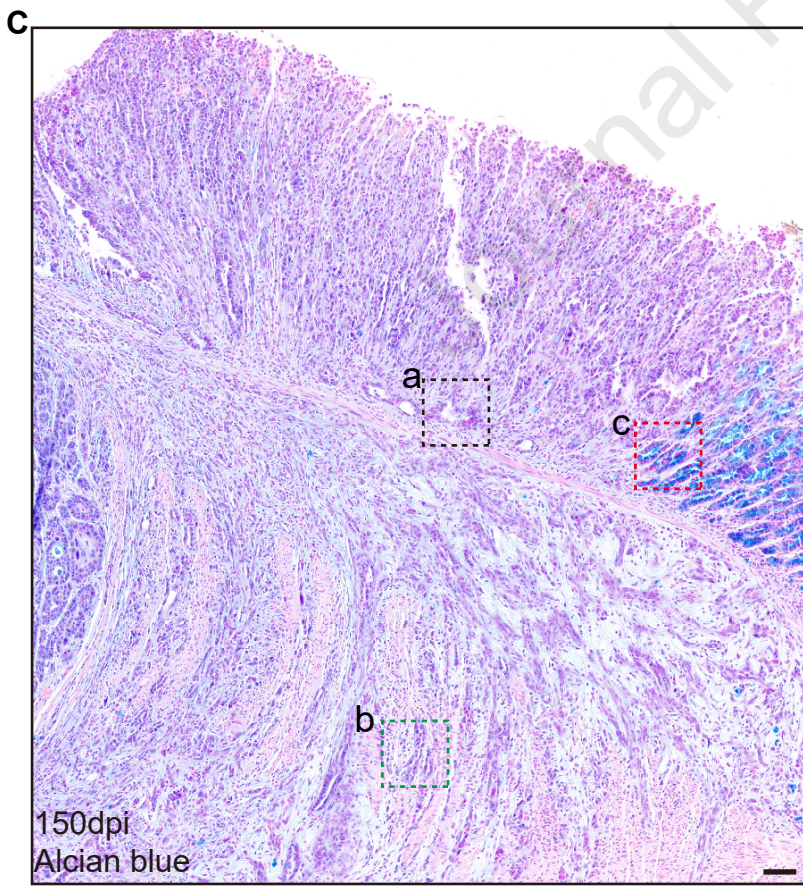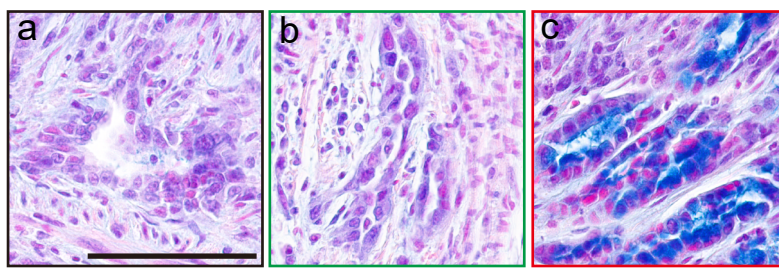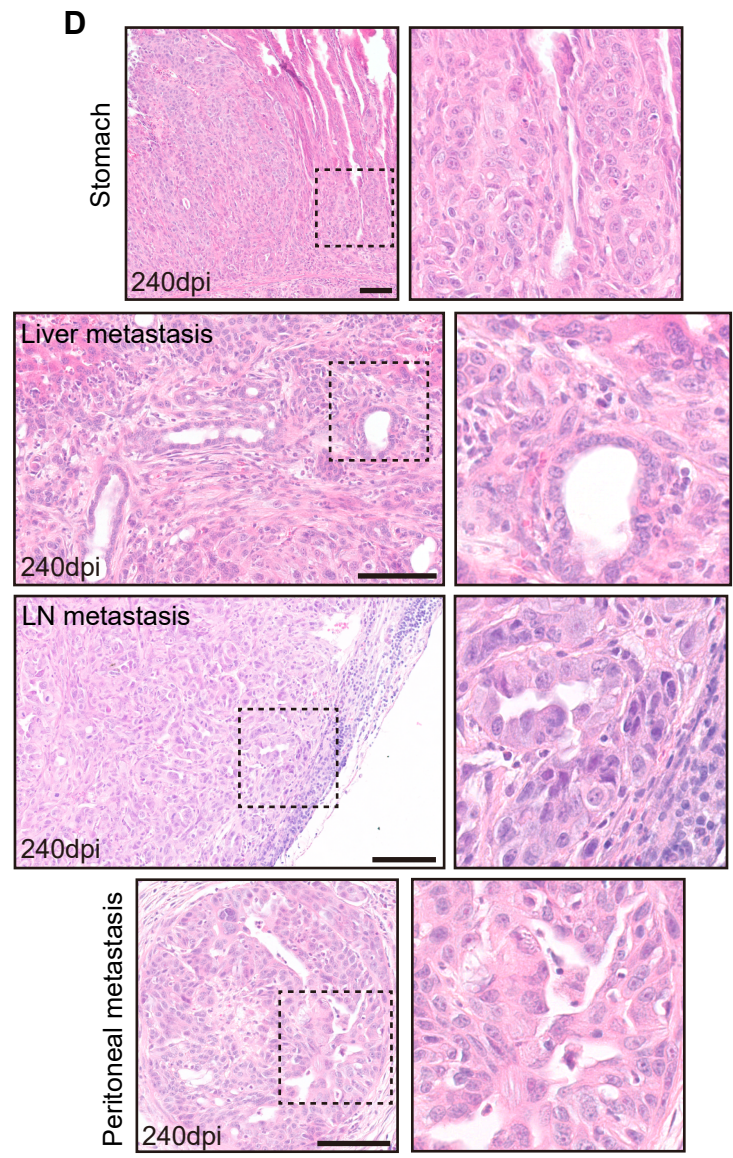

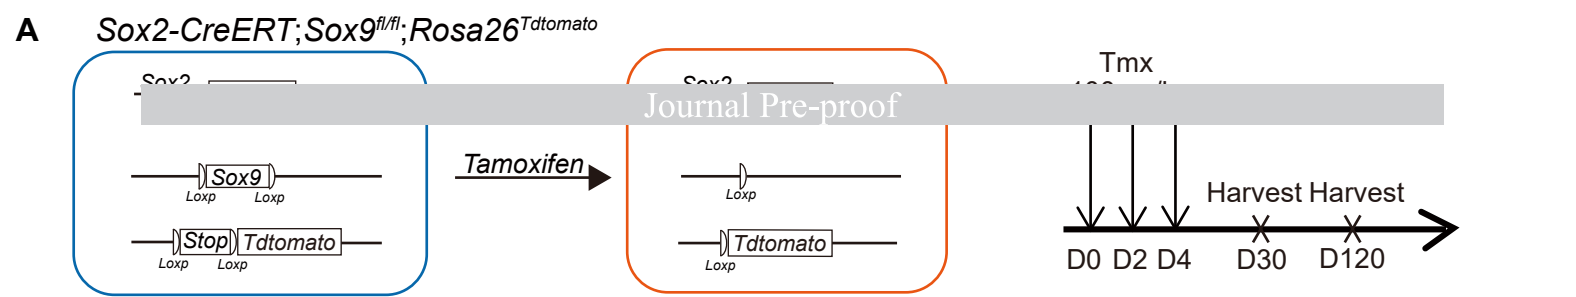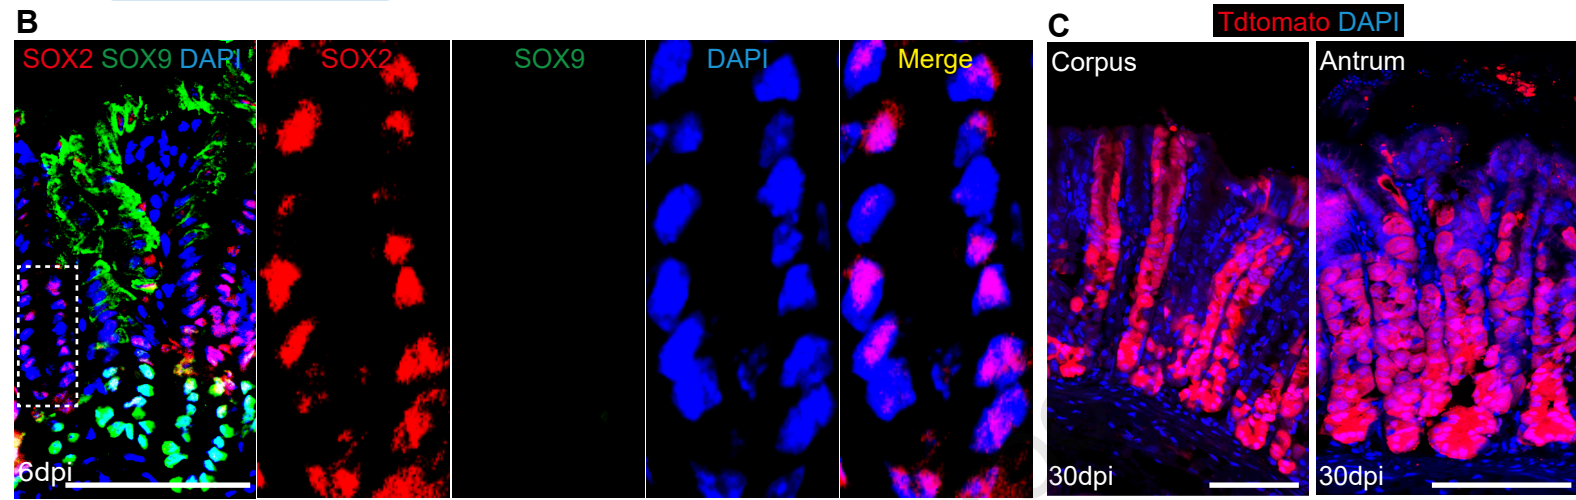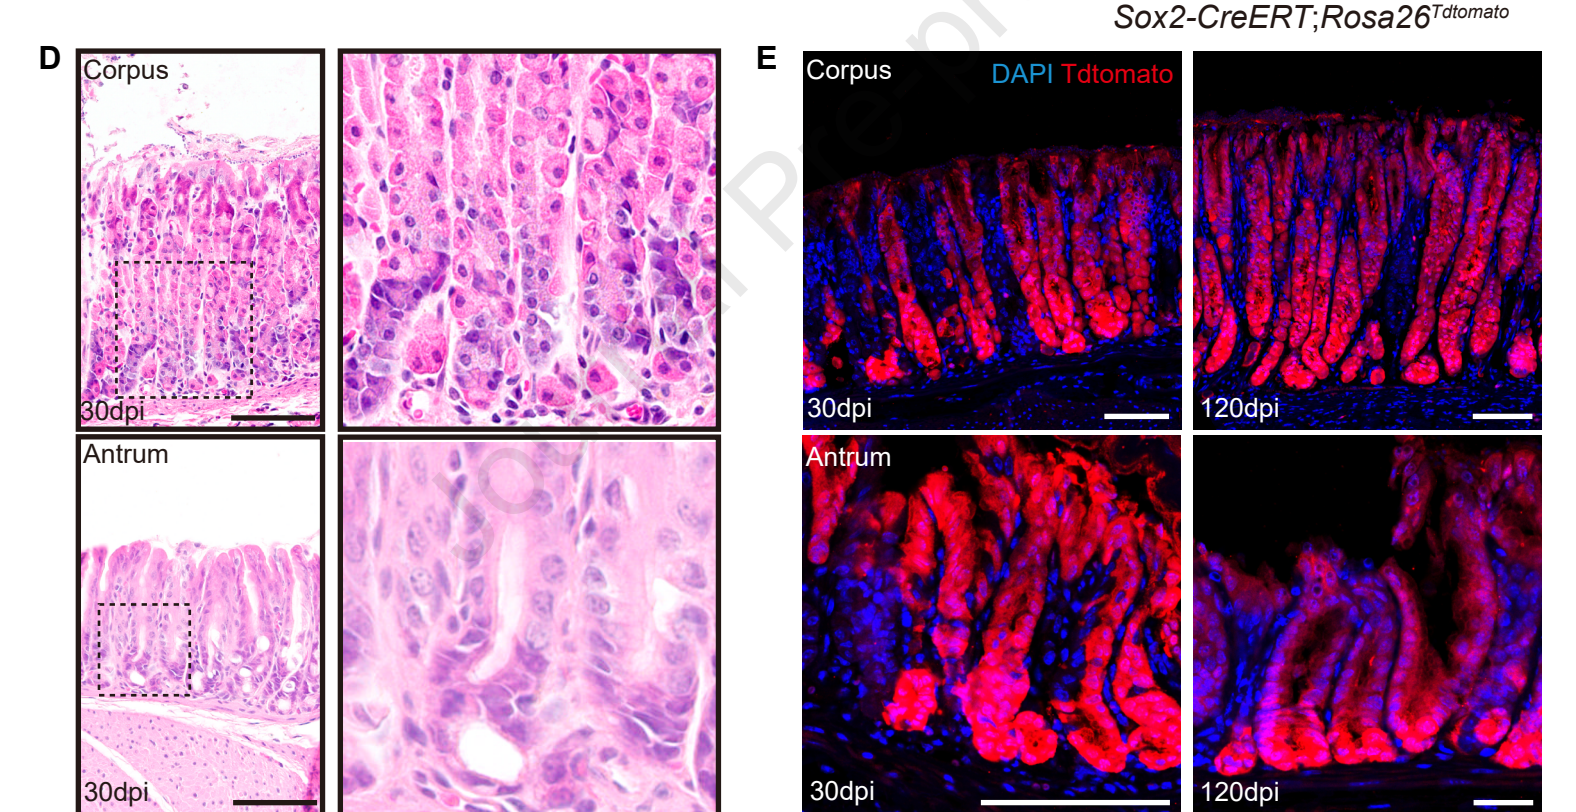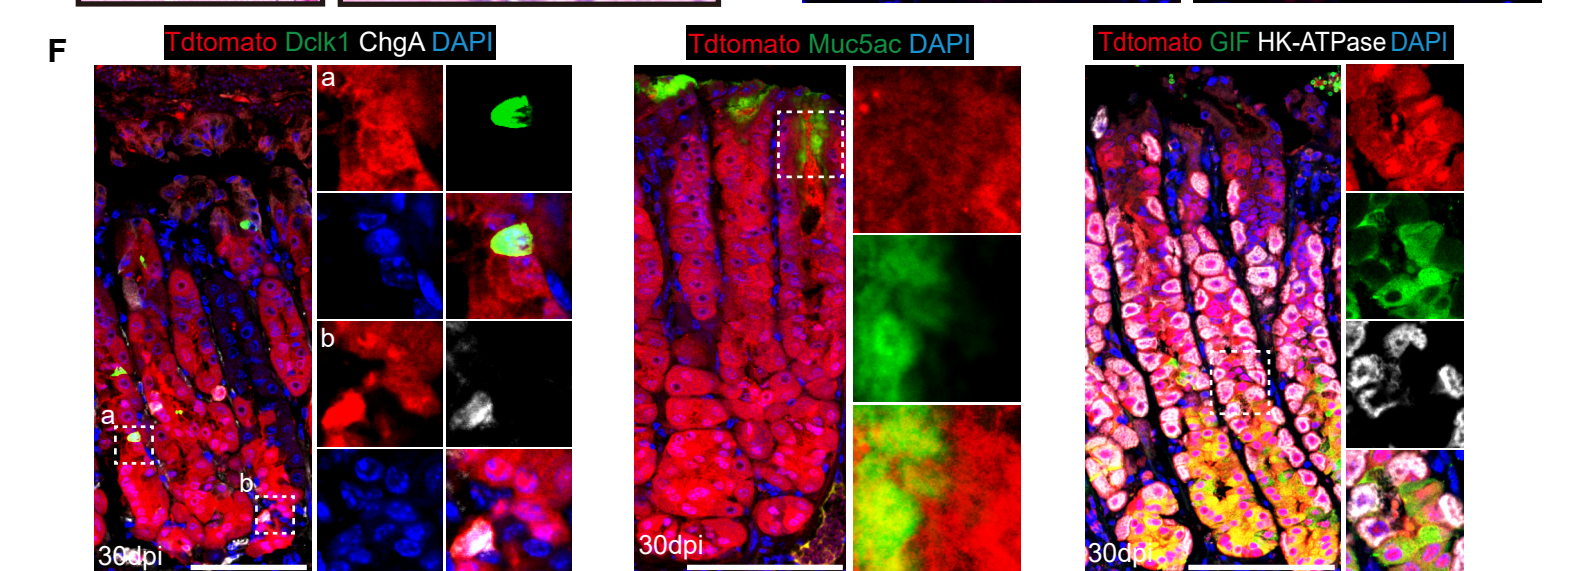

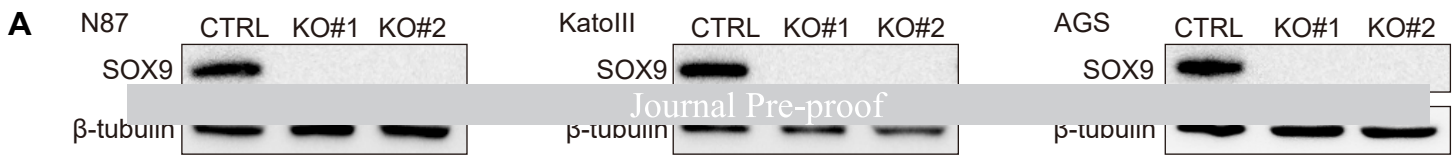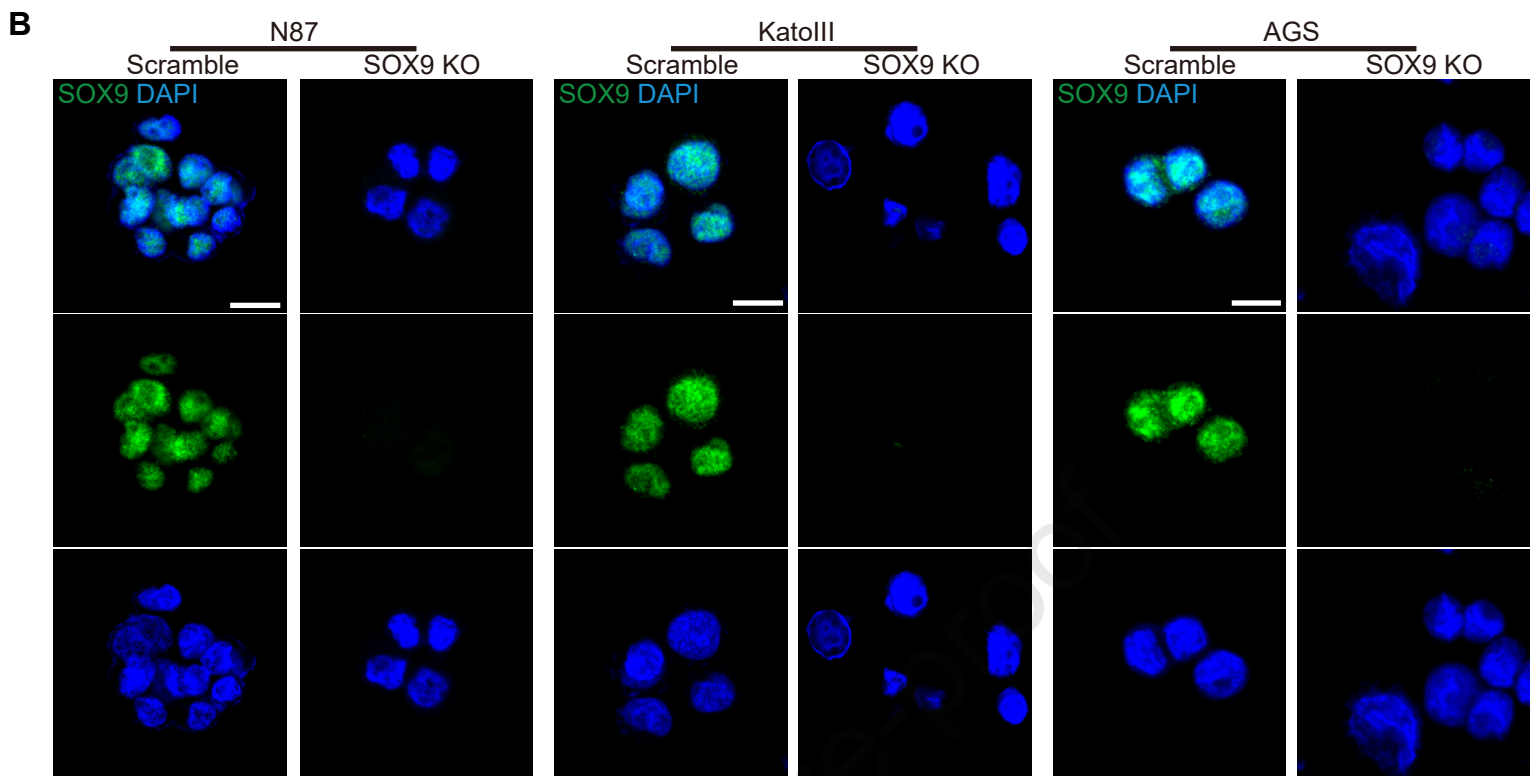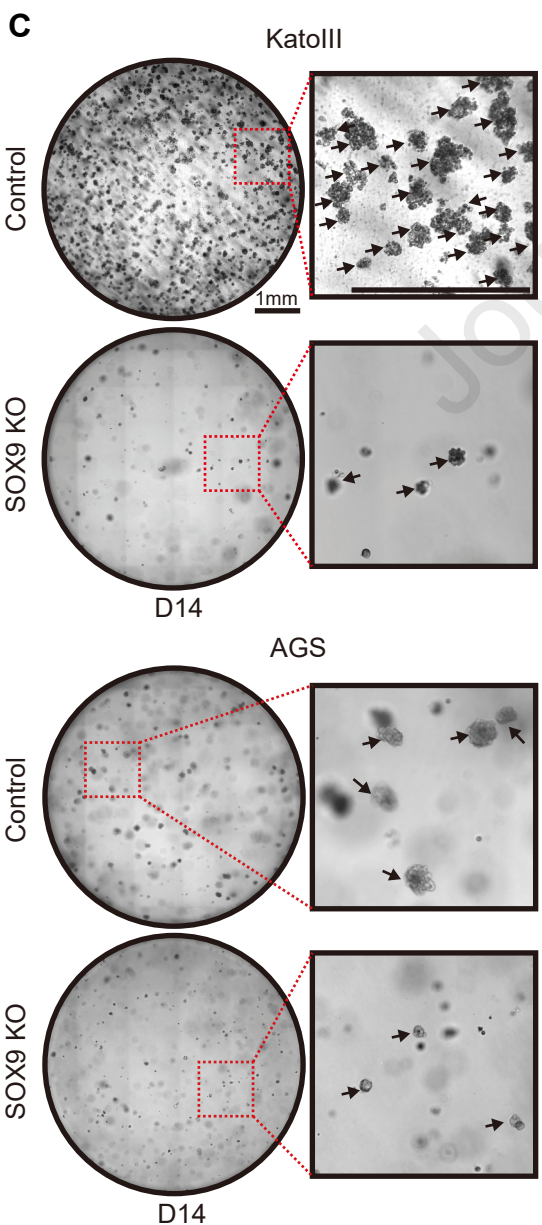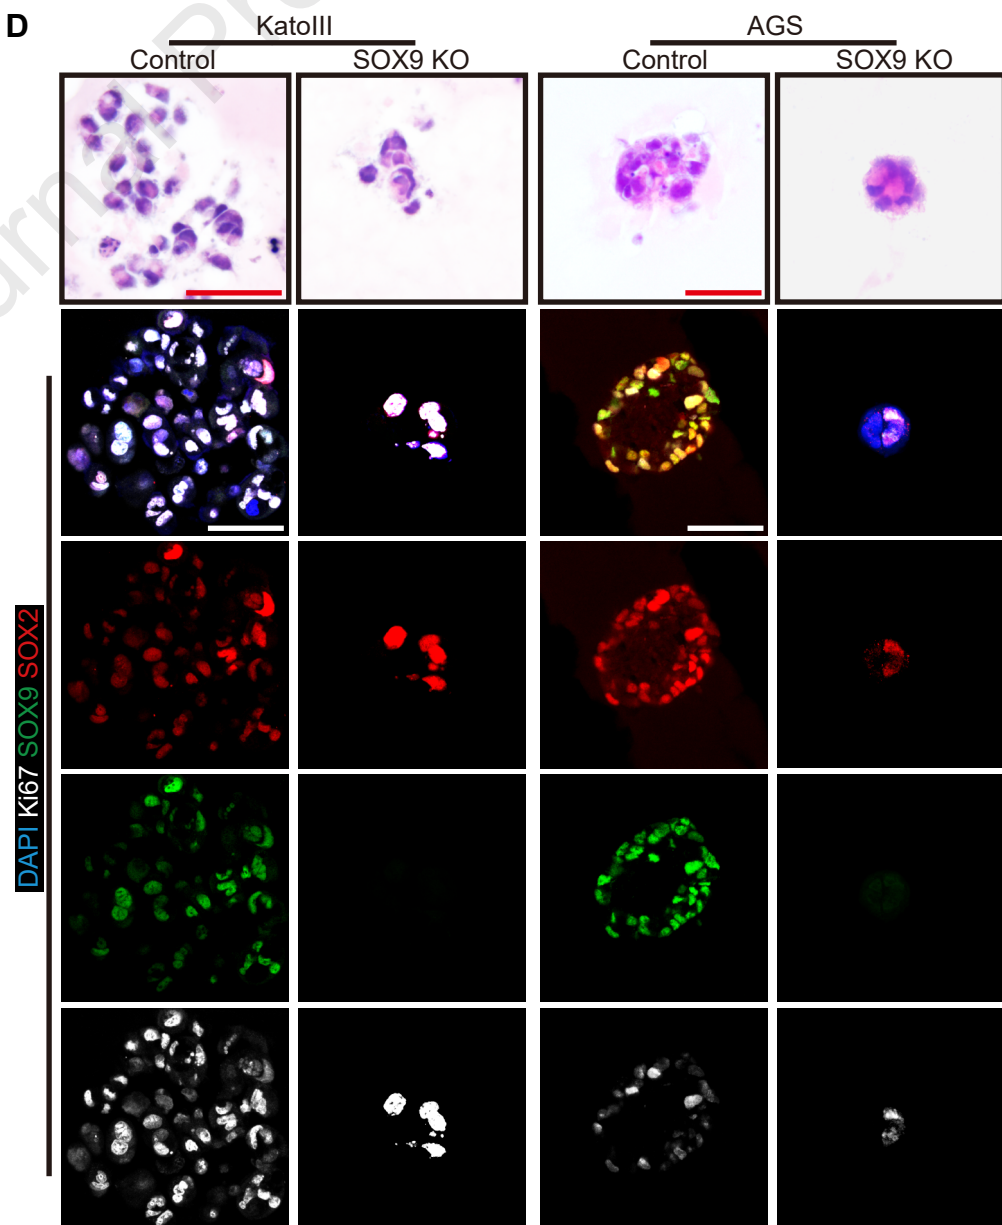

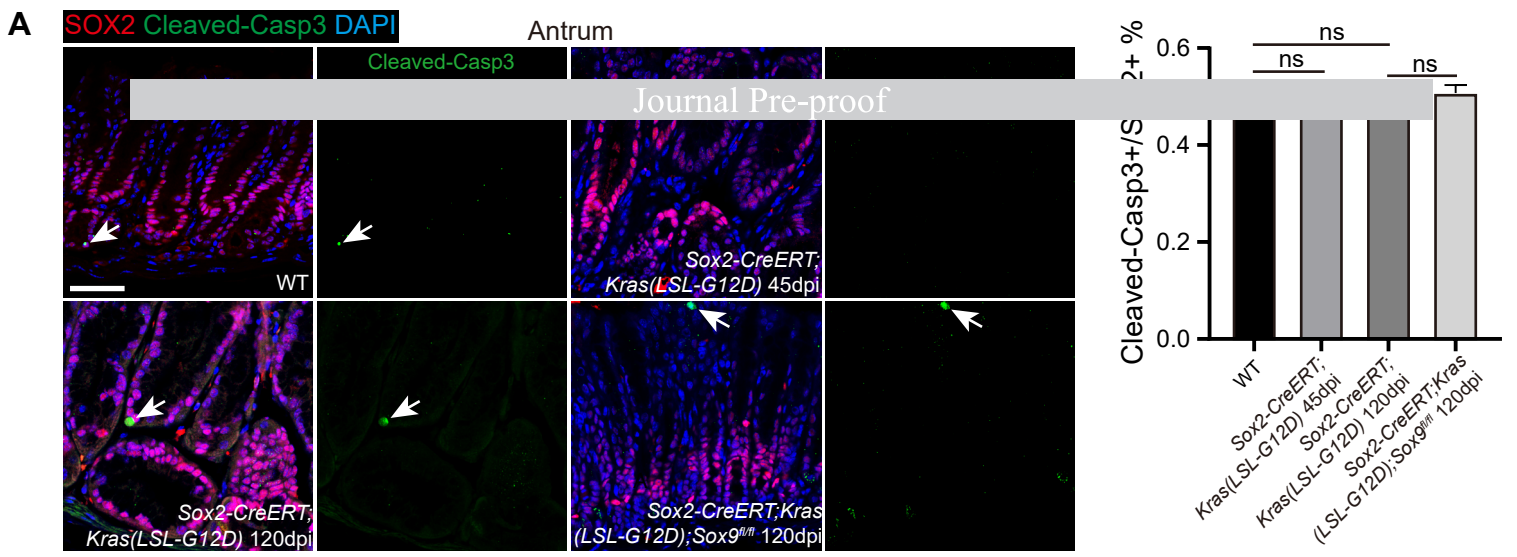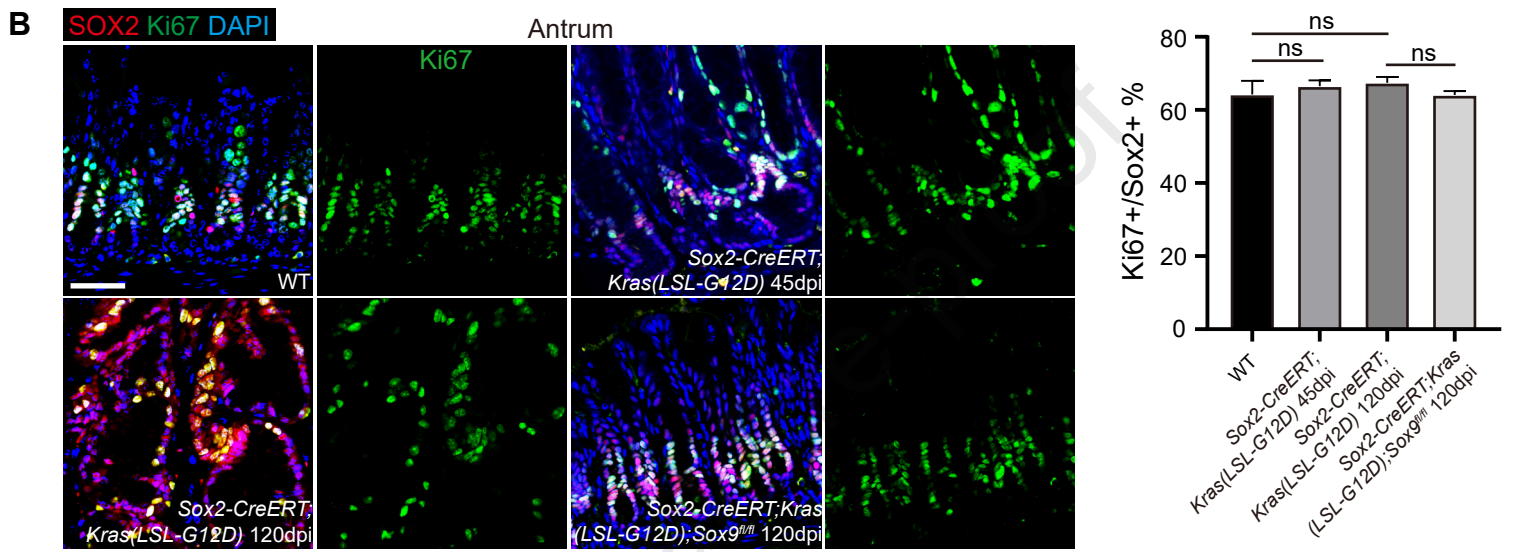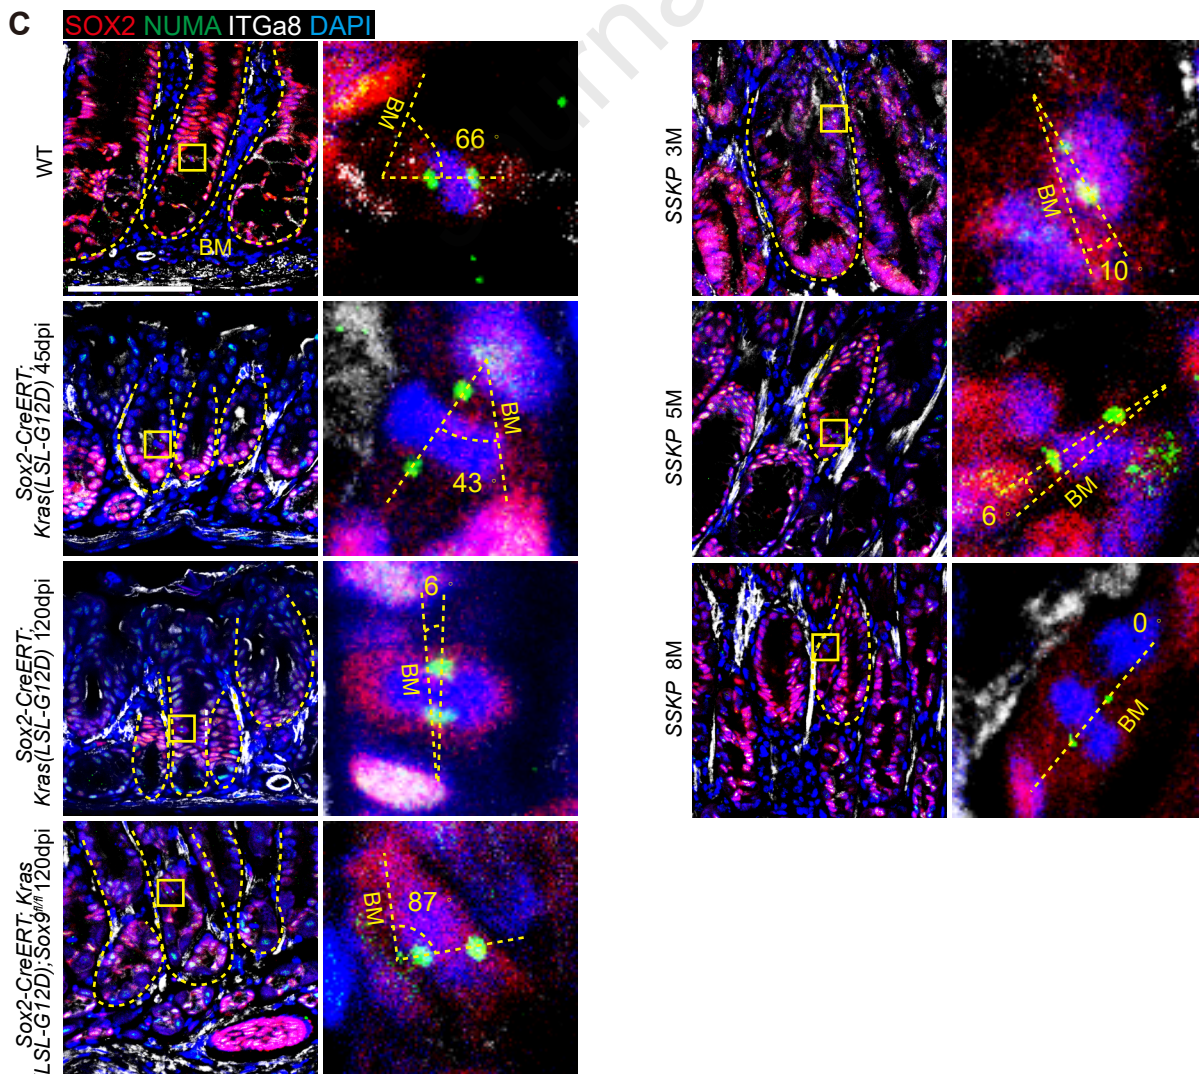

SOX9 AuroraB BrdU DAPI

Journal Pre-proof

N87

Control  
Asymn  
SOX9 KO  
Sym  
Asymn

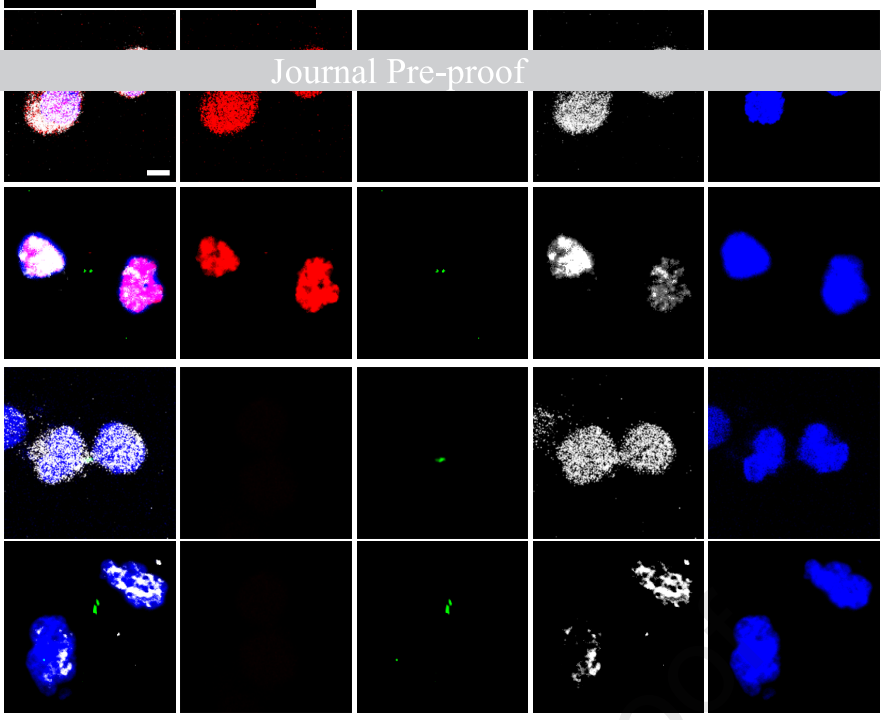

KATOIII

Control  
Asymn  
SOX9 KO  
Sym  
Asymn

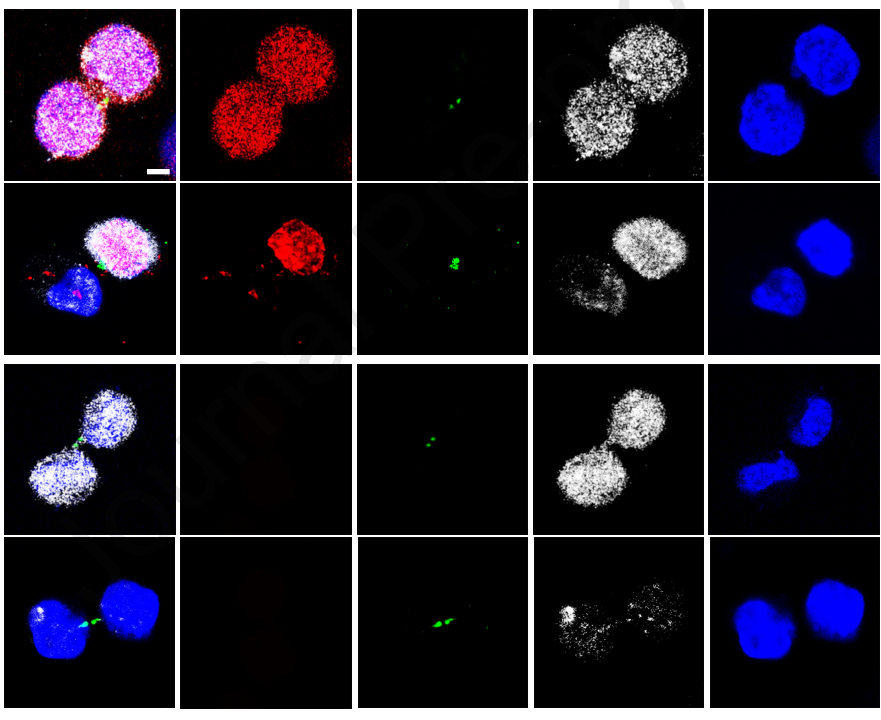

AGS

Control  
Asymn  
SOX9 KO  
Sym  
Asymn

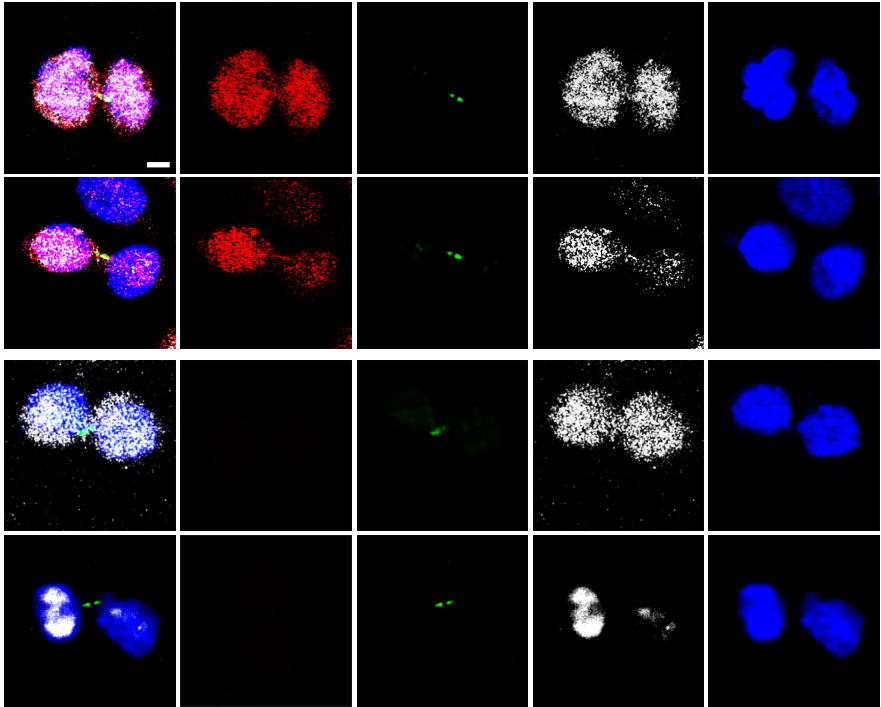



Table S1 The unique genes of SOX2 and SOX9 double positive cell population

| gene      | p_val     | avg logFC | pct.1 | pct.2 | p_val_adj |
|-----------|-----------|-----------|-------|-------|-----------|
| Cdk4      | 1.84E-166 | 0.2732433 | 0.842 | 0.495 | 3.56E-162 |
| Ifitm2    | 4.86E-164 | 0.3051439 | 0.765 | 0.427 | 9.38E-160 |
| Hmgn1     | 4.50E-147 | 0.3354597 | 0.896 | 0.593 | 8.69E-143 |
| Bex4      | 7.45E-144 | 0.2508671 | 0.514 | 0.23  | 1.44E-139 |
| Sox4      | 8.74E-141 | 0.2873243 | 0.645 | 0.324 | 1.69E-136 |
| Tceal9    | 1.15E-139 | 0.267     | 0.911 | 0.615 | 2.22E-135 |
| Tstd1     | 1.24E-138 | 0.2766063 | 0.518 | 0.234 | 2.39E-134 |
| Gm8186    | 2.07E-136 | 0.2578327 | 0.685 | 0.365 | 4.01E-132 |
| Golm1     | 1.10E-133 | 0.2694908 | 0.761 | 0.432 | 2.13E-129 |
| Cxcl17    | 3.10E-131 | 0.259134  | 0.736 | 0.416 | 6.00E-127 |
| Epcam     | 1.00E-128 | 0.3177335 | 0.975 | 0.743 | 1.94E-124 |
| Tuba1b    | 2.37E-121 | 0.386274  | 0.678 | 0.39  | 4.59E-117 |
| Cdk1      | 4.23E-118 | 0.254407  | 0.368 | 0.149 | 8.18E-114 |
| Selenoh   | 3.73E-116 | 0.261768  | 0.733 | 0.434 | 7.21E-112 |
| Hmgb1     | 1.35E-113 | 0.3035255 | 0.954 | 0.708 | 2.60E-109 |
| Gstm2     | 2.69E-113 | 0.2950119 | 0.917 | 0.655 | 5.21E-109 |
| Npm1      | 1.87E-112 | 0.3520319 | 0.973 | 0.768 | 3.60E-108 |
| Ranbp1    | 2.37E-112 | 0.2936383 | 0.839 | 0.568 | 4.57E-108 |
| Eef1a1    | 1.65E-110 | 0.2827939 | 0.998 | 0.94  | 3.20E-106 |
| Stmn1     | 6.42E-109 | 0.2559885 | 0.524 | 0.265 | 1.24E-104 |
| Hmgb2     | 2.55E-108 | 0.4390287 | 0.728 | 0.448 | 4.92E-104 |
| Rps27a    | 6.63E-103 | 0.2803469 | 0.993 | 0.93  | 1.28E-98  |
| Ppib      | 1.59E-102 | 0.3125556 | 0.97  | 0.794 | 3.06E-98  |
| Rpl10a    | 1.28E-100 | 0.289828  | 0.994 | 0.892 | 2.47E-96  |
| Glul      | 6.19E-99  | 0.2730052 | 0.945 | 0.706 | 1.20E-94  |
| Wfdc2     | 1.51E-98  | 0.2883918 | 0.77  | 0.47  | 2.92E-94  |
| Ifitm3    | 2.91E-98  | 0.4844885 | 0.641 | 0.396 | 5.62E-94  |
| Top2a     | 3.92E-98  | 0.2869803 | 0.343 | 0.146 | 7.57E-94  |
| Rpl15     | 7.88E-98  | 0.2865267 | 0.992 | 0.888 | 1.52E-93  |
| Tubb5     | 5.37E-94  | 0.3263691 | 0.753 | 0.495 | 1.04E-89  |
| Clu       | 2.30E-93  | 0.4769301 | 0.983 | 0.86  | 4.44E-89  |
| Ran       | 5.49E-93  | 0.2973792 | 0.912 | 0.664 | 1.06E-88  |
| Rps5      | 1.43E-92  | 0.2700764 | 0.994 | 0.919 | 2.77E-88  |
| Mt2       | 2.60E-92  | 0.3864333 | 0.804 | 0.53  | 5.03E-88  |
| Rplp0     | 6.50E-92  | 0.2743458 | 0.995 | 0.933 | 1.26E-87  |
| Eef1b2    | 2.84E-91  | 0.2686427 | 0.972 | 0.79  | 5.49E-87  |
| Hist1h2ap | 1.27E-90  | 0.5618747 | 0.334 | 0.144 | 2.45E-86  |
| Ppia      | 2.00E-90  | 0.2958638 | 0.998 | 0.933 | 3.85E-86  |
| Rpl13     | 5.38E-90  | 0.260634  | 0.999 | 0.947 | 1.04E-85  |
| Rps7      | 4.01E-88  | 0.2593503 | 0.993 | 0.894 | 7.75E-84  |
| Gpx2      | 4.42E-88  | 0.3008102 | 0.89  | 0.635 | 8.55E-84  |
| Cks2      | 1.01E-87  | 0.3197046 | 0.522 | 0.29  | 1.95E-83  |
| Muc6      | 1.18E-86  | 0.2554214 | 0.611 | 0.331 | 2.27E-82  |
| Rpsa      | 2.39E-86  | 0.2879497 | 0.996 | 0.91  | 4.62E-82  |
| Rps4x     | 9.66E-84  | 0.2615637 | 0.995 | 0.914 | 1.87E-79  |
| Rps8      | 1.93E-83  | 0.2855697 | 0.996 | 0.919 | 3.73E-79  |
| Rps20     | 4.61E-82  | 0.2836087 | 0.993 | 0.915 | 8.90E-78  |
| Ptma      | 7.92E-81  | 0.3152767 | 0.997 | 0.931 | 1.53E-76  |
| Hsp90ab1  | 1.91E-80  | 0.276484  | 0.996 | 0.872 | 3.69E-76  |
| Rps10     | 2.38E-80  | 0.2556727 | 0.992 | 0.9   | 4.60E-76  |
| Rpl10-ps3 | 3.78E-79  | 0.2929812 | 0.88  | 0.642 | 7.30E-75  |
| Rpl30     | 4.88E-78  | 0.2631435 | 0.993 | 0.894 | 9.42E-74  |
| Agr2      | 6.19E-77  | 0.539697  | 0.891 | 0.678 | 1.20E-72  |
| Rpl7a     | 6.63E-74  | 0.2508581 | 0.988 | 0.851 | 1.28E-69  |
| Rpl3      | 6.39E-73  | 0.2607845 | 0.988 | 0.864 | 1.23E-68  |
| Rpl7      | 1.81E-71  | 0.2761551 | 0.987 | 0.851 | 3.50E-67  |
| Birc5     | 1.33E-68  | 0.2681835 | 0.384 | 0.2   | 2.57E-64  |
| Pga5      | 8.38E-65  | 0.5096266 | 0.441 | 0.244 | 1.62E-60  |
| Ube2c     | 2.55E-62  | 0.3902673 | 0.387 | 0.213 | 4.93E-58  |
| H2afz     | 2.61E-62  | 0.3027186 | 0.964 | 0.793 | 5.03E-58  |
| Rpl9-ps6  | 3.21E-60  | 0.3192061 | 0.787 | 0.6   | 6.20E-56  |
| Gkn3      | 1.05E-56  | 0.7948898 | 0.351 | 0.19  | 2.02E-52  |
| Mt1       | 4.48E-51  | 0.3161518 | 0.978 | 0.871 | 8.66E-47  |
| Bpifb1    | 1.70E-47  | 0.2576978 | 0.606 | 0.398 | 3.29E-43  |
| Gm10076   | 1.68E-35  | 0.2561572 | 0.93  | 0.831 | 3.24E-31  |

Table S2GO term analysis of SOX2 and SOX9 double positive cell population

| Analysis Type:                                                          | PANTHER Overrepresentation Test      |               |          |                 |             |          |  |
|-------------------------------------------------------------------------|--------------------------------------|---------------|----------|-----------------|-------------|----------|--|
| Ann                                                                     | Journal Pre-proof                    |               |          |                 |             |          |  |
| Analyzed List:                                                          | upload_1 (mus musculus)              |               |          |                 |             |          |  |
| Reference List:                                                         | Mus musculus (all genes in database) |               |          |                 |             |          |  |
| Test Type:                                                              | FISHER                               |               |          |                 |             |          |  |
| Correction:                                                             | FDR                                  |               |          |                 |             |          |  |
| GO biological process complete                                          | Mus musculus                         | upload_1 (65) | expected | fold Enrichment | raw P-value | FDR      |  |
| cellular response to interleukin-4 (GO:0071353)                         | 26                                   | 5             | 0.08     | 65.08           | 3.04E-08    | 2.82E-05 |  |
| response to interleukin-4 (GO:0070670)                                  | 28                                   | 5             | 0.08     | 60.43           | 4.23E-08    | 3.33E-05 |  |
| cytoplasmic translation (GO:0002181)                                    | 111                                  | 17            | 0.33     | 51.83           | 4.70E-24    | 7.42E-20 |  |
| maturation of LSU-rRNA (GO:0000470)                                     | 29                                   | 4             | 0.09     | 46.68           | 2.63E-06    | 1.54E-03 |  |
| cellular response to cadmium ion (GO:0071276)                           | 26                                   | 3             | 0.08     | 39.05           | 8.44E-05    | 2.77E-02 |  |
| regulation of nuclease activity (GO:0032069)                            | 27                                   | 3             | 0.08     | 37.6            | 9.36E-05    | 2.89E-02 |  |
| positive regulation of cell cycle G2/M phase transition (GO:1902751)    | 32                                   | 3             | 0.09     | 31.73           | 1.49E-04    | 3.74E-02 |  |
| negative regulation of viral life cycle (GO:1903901)                    | 34                                   | 3             | 0.1      | 29.86           | 1.77E-04    | 4.28E-02 |  |
| response to fatty acid (GO:0070542)                                     | 36                                   | 3             | 0.11     | 28.2            | 2.07E-04    | 4.72E-02 |  |
| ribosomal large subunit biogenesis (GO:0042273)                         | 68                                   | 5             | 0.2      | 24.88           | 2.44E-06    | 1.54E-03 |  |
| ribosomal small subunit biogenesis (GO:0042274)                         | 72                                   | 5             | 0.21     | 23.5            | 3.18E-06    | 1.73E-03 |  |
| translation (GO:0006412)                                                | 357                                  | 19            | 1.05     | 18.01           | 9.61E-19    | 7.57E-15 |  |
| regulation of signal transduction by p53 class mediator (GO:1901796)    | 80                                   | 4             | 0.24     | 16.92           | 1.11E-04    | 3.18E-02 |  |
| peptide biosynthetic process (GO:0043043)                               | 381                                  | 19            | 1.13     | 16.88           | 3.05E-18    | 1.60E-14 |  |
| regulation of viral genome replication (GO:0045069)                     | 90                                   | 4             | 0.27     | 15.04           | 1.71E-04    | 4.22E-02 |  |
| positive regulation of protein localization to nucleus (GO:1900182)     | 92                                   | 4             | 0.27     | 14.71           | 1.86E-04    | 4.31E-02 |  |
| positive regulation of cell cycle phase transition (GO:1901989)         | 116                                  | 5             | 0.34     | 14.59           | 2.90E-05    | 1.20E-02 |  |
| positive regulation of mitotic cell cycle phase transition (GO:1901992) | 95                                   | 4             | 0.28     | 14.25           | 2.09E-04    | 4.71E-02 |  |
| amide biosynthetic process (GO:0043604)                                 | 485                                  | 19            | 1.43     | 13.26           | 2.19E-16    | 6.90E-13 |  |
| ribosome biogenesis (GO:0042254)                                        | 286                                  | 11            | 0.85     | 13.02           | 1.03E-09    | 1.35E-06 |  |
| positive regulation of mitotic cell cycle (GO:0045931)                  | 130                                  | 5             | 0.38     | 13.02           | 4.90E-05    | 1.80E-02 |  |
| peptide metabolic process (GO:0006518)                                  | 524                                  | 20            | 1.55     | 12.92           | 4.95E-17    | 1.95E-13 |  |
| regulation of protein localization to nucleus (GO:1900180)              | 150                                  | 5             | 0.44     | 11.28           | 9.44E-05    | 2.86E-02 |  |
| mitotic cell cycle phase transition (GO:0044772)                        | 154                                  | 5             | 0.46     | 10.99           | 1.06E-04    | 3.16E-02 |  |
| protein stabilization (GO:0050821)                                      | 193                                  | 6             | 0.57     | 10.52           | 2.65E-05    | 1.13E-02 |  |
| cell cycle phase transition (GO:0044770)                                | 165                                  | 5             | 0.49     | 10.26           | 1.46E-04    | 3.83E-02 |  |
| ribonucleoprotein complex biogenesis (GO:0022613)                       | 402                                  | 12            | 1.19     | 10.1            | 2.67E-09    | 3.24E-06 |  |
| rRNA processing (GO:0006364)                                            | 207                                  | 6             | 0.61     | 9.81            | 3.88E-05    | 1.49E-02 |  |
| cellular macromolecule biosynthetic process (GO:0034645)                | 725                                  | 20            | 2.14     | 9.34            | 1.96E-14    | 5.16E-11 |  |
| cellular amide metabolic process (GO:0043603)                           | 767                                  | 20            | 2.27     | 8.82            | 5.48E-14    | 1.23E-10 |  |
| rRNA metabolic process (GO:0016072)                                     | 240                                  | 6             | 0.71     | 8.46            | 8.62E-05    | 2.77E-02 |  |
| regulation of epithelial cell proliferation (GO:0050678)                | 439                                  | 10            | 1.3      | 7.71            | 7.26E-07    | 4.98E-04 |  |
| positive regulation of cell cycle process (GO:0090068)                  | 266                                  | 6             | 0.79     | 7.63            | 1.49E-04    | 3.79E-02 |  |
| positive regulation of cell cycle (GO:0045787)                          | 354                                  | 7             | 1.05     | 6.69            | 9.13E-05    | 2.88E-02 |  |
| macromolecule biosynthetic process (GO:0009059)                         | 1272                                 | 24            | 3.76     | 6.39            | 8.97E-14    | 1.77E-10 |  |
| cellular nitrogen compound biosynthetic process (GO:0044271)            | 1355                                 | 23            | 4        | 5.74            | 2.98E-12    | 5.22E-09 |  |
| organonitrogen compound biosynthetic process (GO:1901566)               | 1218                                 | 20            | 3.6      | 5.56            | 2.07E-10    | 2.97E-07 |  |
| positive regulation of protein localization (GO:1903829)                | 493                                  | 8             | 1.46     | 5.49            | 1.08E-04    | 3.17E-02 |  |
| cell division (GO:0051301)                                              | 506                                  | 8             | 1.5      | 5.35            | 1.29E-04    | 3.58E-02 |  |
| mitotic cell cycle (GO:0000278)                                         | 579                                  | 9             | 1.71     | 5.26            | 5.40E-05    | 1.89E-02 |  |
| cell cycle process (GO:0022402)                                         | 803                                  | 11            | 2.37     | 4.64            | 2.34E-05    | 1.05E-02 |  |
| cellular response to cytokine stimulus (GO:0071345)                     | 695                                  | 9             | 2.05     | 4.38            | 2.11E-04    | 4.68E-02 |  |
| negative regulation of cell death (GO:0060548)                          | 1118                                 | 13            | 3.3      | 3.94            | 2.15E-05    | 1.03E-02 |  |
| cellular macromolecule metabolic process (GO:0044260)                   | 2348                                 | 27            | 6.94     | 3.89            | 1.52E-10    | 2.40E-07 |  |
| negative regulation of apoptotic process (GO:0043066)                   | 962                                  | 11            | 2.84     | 3.87            | 1.17E-04    | 3.29E-02 |  |
| regulation of cell cycle (GO:0051726)                                   | 1067                                 | 12            | 3.15     | 3.81            | 6.43E-05    | 2.15E-02 |  |
| negative regulation of programmed cell death (GO:0043069)               | 985                                  | 11            | 2.91     | 3.78            | 1.43E-04    | 3.83E-02 |  |
| cellular biosynthetic process (GO:0044249)                              | 2150                                 | 24            | 6.35     | 3.78            | 4.47E-09    | 5.03E-06 |  |
| positive regulation of cell population proliferation (GO:0008284)       | 1013                                 | 11            | 2.99     | 3.67            | 1.83E-04    | 4.37E-02 |  |
| organic substance biosynthetic process (GO:1901576)                     | 2240                                 | 24            | 6.62     | 3.63            | 9.97E-09    | 1.05E-05 |  |
| biosynthetic process (GO:0009058)                                       | 2313                                 | 24            | 6.83     | 3.51            | 1.86E-08    | 1.83E-05 |  |
| regulation of apoptotic process (GO:0042981)                            | 1560                                 | 16            | 4.61     | 3.47            | 9.67E-06    | 4.92E-03 |  |
| regulation of cell death (GO:0010941)                                   | 1767                                 | 18            | 5.22     | 3.45            | 2.53E-06    | 1.53E-03 |  |
| regulation of programmed cell death (GO:0043067)                        | 1592                                 | 16            | 4.7      | 3.4             | 1.24E-05    | 6.13E-03 |  |
| gene expression (GO:0010467)                                            | 2412                                 | 24            | 7.13     | 3.37            | 4.15E-08    | 3.45E-05 |  |
| regulation of cell population proliferation (GO:0042127)                | 1745                                 | 16            | 5.16     | 3.1             | 3.82E-05    | 1.51E-02 |  |
| cellular response to chemical stimulus (GO:0070887)                     | 2500                                 | 22            | 7.39     | 2.98            | 1.56E-06    | 1.02E-03 |  |
| cellular nitrogen compound metabolic process (GO:0034641)               | 3235                                 | 28            | 9.56     | 2.93            | 3.65E-08    | 3.19E-05 |  |
| protein metabolic process (GO:0019538)                                  | 3741                                 | 29            | 11.05    | 2.62            | 2.07E-07    | 1.56E-04 |  |
| response to organic substance (GO:0010033)                              | 2641                                 | 20            | 7.8      | 2.56            | 5.03E-05    | 1.80E-02 |  |
| cellular component biogenesis (GO:0044085)                              | 2437                                 | 18            | 7.2      | 2.5             | 1.86E-04    | 4.37E-02 |  |
| organelle organization (GO:0006996)                                     | 2886                                 | 21            | 8.53     | 2.46            | 5.48E-05    | 1.88E-02 |  |
| response to chemical (GO:0042221)                                       | 3602                                 | 25            | 10.64    | 2.35            | 2.53E-05    | 1.11E-02 |  |
| organonitrogen compound metabolic process (GO:1901564)                  | 4762                                 | 31            | 14.07    | 2.2             | 5.37E-06    | 2.82E-03 |  |
| macromolecule metabolic process (GO:0043170)                            | 5824                                 | 37            | 17.21    | 2.15            | 2.70E-07    | 1.93E-04 |  |
| nitrogen compound metabolic process (GO:0006807)                        | 6312                                 | 37            | 18.65    | 1.98            | 2.76E-06    | 1.55E-03 |  |
| cellular component organization or biogenesis (GO:0071840)              | 5606                                 | 31            | 16.57    | 1.87            | 1.49E-04    | 3.84E-02 |  |
| cellular metabolic process (GO:0044237)                                 | 6217                                 | 34            | 18.37    | 1.85            | 4.67E-05    | 1.75E-02 |  |
| primary metabolic process (GO:0044238)                                  | 6871                                 | 37            | 20.3     | 1.82            | 2.16E-05    | 1.00E-02 |  |
| organic substance metabolic process (GO:0071704)                        | 7593                                 | 39            | 22.44    | 1.74            | 3.51E-05    | 1.42E-02 |  |
| metabolic process (GO:0008152)                                          | 7979                                 | 39            | 23.58    | 1.65            | 1.36E-04    | 3.70E-02 |  |

Table S3 The quantitation of immunofluorescence intensity of BrdU and Sox9 in paired-cell assays

| Journal Pre-proof |               |                      |           |                |                |                      |             |                |
|-------------------|---------------|----------------------|-----------|----------------|----------------|----------------------|-------------|----------------|
| Group             | Pair cell No. | BrdU intensive value |           | Relative value | Pair cell type | SOX9 intensive value |             | Relative value |
|                   |               | First cell           | Second ce |                |                | First cell           | Second cell |                |
| Control           | 1             | 2634                 | 1416      | 1.86           | sym            | 2498                 | 2048        | 1.22           |
| Control           | 2             | 2422                 | 1486      | 1.63           | sym            | 2554                 | 2409        | 1.06           |
| Control           | 3             | 2464                 | 450       | 5.47           | asym           | 3305                 | 1469        | 2.25           |
| Control           | 4             | 2524                 | 530       | 4.76           | asym           | 2919                 | 671         | 4.35           |
| Control           | 5             | 3276                 | 593       | 5.52           | asym           | 2563                 | 476         | 5.39           |
| Control           | 6             | 2668                 | 652       | 4.09           | asym           | 2818                 | 621         | 4.54           |
| Control           | 7             | 1996                 | 1358      | 1.47           | sym            | 3349                 | 2189        | 1.53           |
| Control           | 8             | 3337                 | 3513      | 0.95           | sym            | 2664                 | 2114        | 1.26           |
| Control           | 9             | 1964                 | 2395      | 0.82           | sym            | 1884                 | 1922        | 0.98           |
| Control           | 10            | 3389                 | 1284      | 2.64           | asym           | 2882                 | 562         | 5.13           |
| Control           | 11            | 3382                 | 717       | 4.72           | asym           | 2098                 | 544         | 3.86           |
| Control           | 12            | 3146                 | 1015      | 3.1            | asym           | 2342                 | 432         | 5.42           |
| Control           | 13            | 3400                 | 2267      | 1.5            | sym            | 3221                 | 3391        | 0.95           |
| Control           | 14            | 2258                 | 2537      | 0.89           | sym            | 2560                 | 1803        | 1.42           |
| Control           | 15            | 1968                 | 1262      | 1.56           | sym            | 1928                 | 1483        | 1.3            |
| Control           | 16            | 1984                 | 548       | 3.62           | asym           | 2893                 | 704         | 4.11           |
| Control           | 17            | 2738                 | 638       | 4.29           | asym           | 2620                 | 764         | 3.43           |
| Control           | 18            | 3425                 | 2299      | 1.49           | sym            | 2376                 | 1964        | 1.21           |
| Control           | 19            | 2539                 | 1628      | 1.56           | sym            | 2989                 | 3690        | 0.81           |
| Control           | 20            | 1974                 | 698       | 2.83           | asym           | 2513                 | 478         | 5.26           |
| Control           | 21            | 2165                 | 1424      | 1.52           | sym            | 2761                 | 3174        | 0.87           |
| Control           | 22            | 2542                 | 521       | 4.88           | asym           | 1905                 | 346         | 5.5            |
| Control           | 23            | 3043                 | 1867      | 1.63           | sym            | 2388                 | 1730        | 1.38           |
| Control           | 24            | 2442                 | 1908      | 1.28           | sym            | 2255                 | 1367        | 1.65           |
| Control           | 25            | 2606                 | 1379      | 1.89           | sym            | 1922                 | 1393        | 1.38           |
| Control           | 26            | 1885                 | 1508      | 1.25           | sym            | 2778                 | 1769        | 1.57           |
| Control           | 27            | 3034                 | 2467      | 1.23           | sym            | 1886                 | 1849        | 1.02           |
| Control           | 28            | 2381                 | 1536      | 1.55           | sym            | 2458                 | 2892        | 0.85           |
| Control           | 29            | 2943                 | 3034      | 0.97           | sym            | 2172                 | 1349        | 1.61           |
| Control           | 30            | 2258                 | 2150      | 1.05           | sym            | 3040                 | 1600        | 1.9            |
| Control           | 31            | 2418                 | 448       | 5.4            | asym           | 3221                 | 1042        | 3.09           |
| Control           | 32            | 3450                 | 2029      | 1.7            | sym            | 2169                 | 1315        | 1.65           |
| Control           | 33            | 3473                 | 2008      | 1.73           | sym            | 3075                 | 3661        | 0.84           |
| Control           | 34            | 3423                 | 1923      | 1.78           | sym            | 2877                 | 1984        | 1.45           |
| Control           | 35            | 2194                 | 1675      | 1.31           | sym            | 2919                 | 3208        | 0.91           |
| Control           | 36            | 2384                 | 1528      | 1.56           | sym            | 3151                 | 1658        | 1.9            |
| Control           | 37            | 3290                 | 2384      | 1.38           | sym            | 2387                 | 1705        | 1.4            |
| Control           | 38            | 3374                 | 1555      | 2.17           | asym           | 3027                 | 898         | 3.37           |
| Control           | 39            | 2445                 | 2038      | 1.2            | sym            | 3348                 | 2462        | 1.36           |
| Control           | 40            | 3151                 | 3089      | 1.02           | sym            | 3442                 | 2776        | 1.24           |
| Control           | 41            | 3160                 | 1681      | 1.88           | sym            | 3243                 | 3276        | 0.99           |
| Control           | 42            | 2514                 | 2958      | 0.85           | sym            | 2342                 | 1541        | 1.52           |
| Control           | 43            | 2676                 | 2212      | 1.21           | sym            | 2844                 | 1571        | 1.81           |
| Control           | 44            | 2912                 | 1541      | 1.89           | sym            | 2103                 | 1384        | 1.52           |
| Control           | 45            | 3294                 | 2387      | 1.38           | sym            | 3131                 | 1994        | 1.57           |
| Control           | 46            | 2586                 | 1383      | 1.87           | sym            | 2435                 | 1458        | 1.67           |
| Control           | 47            | 2355                 | 2201      | 1.07           | sym            | 2504                 | 2140        | 1.17           |
| Control           | 48            | 2591                 | 2671      | 0.97           | sym            | 3395                 | 1962        | 1.73           |
| Control           | 49            | 3089                 | 2073      | 1.49           | sym            | 3152                 | 1751        | 1.8            |
| Control           | 50            | 3055                 | 1808      | 1.69           | sym            | 2281                 | 1702        | 1.34           |
| Control           | 51            | 2245                 | 1283      | 1.75           | sym            | 3037                 | 2080        | 1.46           |
| Control           | 52            | 1971                 | 696       | 2.83           | asym           | 2660                 | 598         | 4.45           |
| Control           | 53            | 2608                 | 513       | 5.08           | asym           | 2103                 | 666         | 3.16           |
| Control           | 54            | 2099                 | 792       | 2.65           | asym           | 2922                 | 1243        | 2.35           |
| Control           | 55            | 2938                 | 706       | 4.16           | asym           | 2541                 | 470         | 5.41           |
| Control           | 56            | 3243                 | 2268      | 1.43           | sym            | 2009                 | 1225        | 1.64           |
| Control           | 57            | 2310                 | 414       | 5.58           | asym           | 3146                 | 931         | 3.38           |
| Control           | 58            | 2424                 | 2090      | 1.16           | sym            | 2475                 | 1719        | 1.44           |
| Control           | 59            | 2370                 | 2347      | 1.01           | sym            | 2774                 | 2667        | 1.04           |
| Control           | 60            | 2940                 | 2697      | 1.09           | sym            | 3210                 | 2791        | 1.15           |
| Control           | 61            | 2391                 | 1733      | 1.38           | sym            | 2247                 | 1783        | 1.26           |
| Control           | 62            | 1804                 | 1279      | 1.41           | sym            | 3228                 | 2083        | 1.55           |

|         |     |      |      |      |      |      |      |      |
|---------|-----|------|------|------|------|------|------|------|
| Control | 64  | 3178 | 2192 | 1.45 | sym  | 2760 | 2379 | 1.16 |
| Control | 65  | 3185 | 2275 | 1.4  | sym  | 1947 | 2291 | 0.85 |
| Control | 66  | 3494 | 2478 | 1.41 | sym  | 2575 | 2994 | 0.86 |
| Control | 67  | 2611 | 1467 | 1.78 | sym  | 1867 | 2008 | 0.93 |
| Control | 68  | 2891 | 1742 | 1.66 | sym  | 3246 | 1824 | 1.78 |
| Control | 69  | 2925 | 3079 | 0.95 | sym  | 2794 | 2166 | 1.29 |
| Control | 70  | 2155 | 1995 | 1.08 | sym  | 2960 | 1574 | 1.88 |
| Control | 71  | 3125 | 1917 | 1.63 | sym  | 1819 | 1516 | 1.2  |
| Control | 72  | 2283 | 1254 | 1.82 | sym  | 2489 | 1368 | 1.82 |
| Control | 73  | 1950 | 1625 | 1.2  | sym  | 2681 | 1645 | 1.63 |
| Control | 74  | 2683 | 452  | 5.93 | asym | 2577 | 917  | 2.81 |
| Control | 75  | 2286 | 1044 | 2.19 | asym | 2704 | 585  | 4.62 |
| Control | 76  | 2099 | 572  | 3.67 | asym | 2256 | 770  | 2.93 |
| Control | 77  | 2219 | 1290 | 1.72 | sym  | 2553 | 1616 | 1.58 |
| Control | 78  | 3447 | 2535 | 1.36 | sym  | 2587 | 2174 | 1.19 |
| Control | 79  | 2078 | 1244 | 1.67 | sym  | 2322 | 2150 | 1.08 |
| Control | 80  | 2636 | 3295 | 0.8  | sym  | 2540 | 1388 | 1.83 |
| Control | 81  | 2766 | 1637 | 1.69 | sym  | 3406 | 2792 | 1.22 |
| Control | 82  | 2377 | 1774 | 1.34 | sym  | 2128 | 1702 | 1.25 |
| Control | 83  | 3251 | 2827 | 1.15 | sym  | 2402 | 1334 | 1.8  |
| Control | 84  | 2232 | 1757 | 1.27 | sym  | 2647 | 1697 | 1.56 |
| Control | 85  | 2217 | 2034 | 1.09 | sym  | 2016 | 2057 | 0.98 |
| Control | 86  | 3055 | 2966 | 1.03 | sym  | 2605 | 1598 | 1.63 |
| Control | 87  | 2004 | 347  | 5.77 | asym | 2182 | 428  | 5.1  |
| Control | 88  | 2371 | 1428 | 1.66 | sym  | 3437 | 2546 | 1.35 |
| Control | 89  | 3373 | 2677 | 1.26 | sym  | 3251 | 2852 | 1.14 |
| Control | 90  | 2221 | 726  | 3.06 | asym | 2282 | 443  | 5.15 |
| Control | 91  | 2170 | 2009 | 1.08 | sym  | 3337 | 2670 | 1.25 |
| Control | 92  | 1837 | 827  | 2.22 | asym | 1958 | 434  | 4.51 |
| Control | 93  | 2228 | 2532 | 0.88 | sym  | 1808 | 1102 | 1.64 |
| Control | 94  | 3474 | 2714 | 1.28 | sym  | 2611 | 1729 | 1.51 |
| Control | 95  | 2129 | 2314 | 0.92 | sym  | 2551 | 1646 | 1.55 |
| Control | 96  | 3327 | 1992 | 1.67 | sym  | 3082 | 3279 | 0.94 |
| Control | 97  | 2465 | 1377 | 1.79 | sym  | 1909 | 1689 | 1.13 |
| Control | 98  | 2562 | 2117 | 1.21 | sym  | 3343 | 2786 | 1.2  |
| Control | 99  | 3204 | 2122 | 1.51 | sym  | 3118 | 1890 | 1.65 |
| Control | 100 | 1851 | 1076 | 1.72 | sym  | 2576 | 2094 | 1.23 |
| Control | 101 | 1811 | 1184 | 1.53 | sym  | 3423 | 1860 | 1.84 |
| Control | 102 | 2415 | 1421 | 1.7  | sym  | 3178 | 3417 | 0.93 |
| Control | 103 | 2309 | 415  | 5.57 | asym | 2864 | 1364 | 2.1  |
| Control | 104 | 2092 | 1268 | 1.65 | sym  | 3047 | 3809 | 0.8  |
| Control | 105 | 2843 | 2843 | 1    | sym  | 1993 | 1394 | 1.43 |
| Control | 106 | 1918 | 1031 | 1.86 | sym  | 2364 | 1391 | 1.7  |
| Control | 107 | 2720 | 1766 | 1.54 | sym  | 3359 | 3199 | 1.05 |
| Control | 108 | 2283 | 417  | 5.48 | asym | 3217 | 798  | 4.03 |
| Control | 109 | 1842 | 355  | 5.19 | asym | 2514 | 549  | 4.58 |
| Control | 110 | 3072 | 2104 | 1.46 | sym  | 2786 | 1775 | 1.57 |
| Control | 111 | 2239 | 2035 | 1.1  | sym  | 3131 | 1789 | 1.75 |
| Control | 112 | 2494 | 2900 | 0.86 | sym  | 2183 | 2509 | 0.87 |
| Control | 113 | 2357 | 1708 | 1.38 | sym  | 1914 | 1507 | 1.27 |
| Control | 114 | 2323 | 1249 | 1.86 | sym  | 1800 | 1053 | 1.71 |
| Control | 115 | 3292 | 775  | 4.25 | asym | 3450 | 1468 | 2.35 |
| Control | 116 | 2826 | 933  | 3.03 | asym | 2842 | 561  | 5.07 |
| Control | 117 | 2552 | 2430 | 1.05 | sym  | 2330 | 1302 | 1.79 |
| Control | 118 | 2040 | 1109 | 1.84 | sym  | 2759 | 1735 | 1.59 |
| Control | 119 | 1967 | 1237 | 1.59 | sym  | 2634 | 1722 | 1.53 |
| Control | 120 | 2077 | 1463 | 1.42 | sym  | 2201 | 2317 | 0.95 |
| Control | 121 | 1872 | 1156 | 1.62 | sym  | 2802 | 2547 | 1.1  |
| Control | 122 | 3149 | 1908 | 1.65 | sym  | 2321 | 1469 | 1.58 |
| Control | 123 | 2998 | 3369 | 0.89 | sym  | 1913 | 2391 | 0.8  |
| Control | 124 | 3311 | 3485 | 0.95 | sym  | 3258 | 2450 | 1.33 |
| Control | 125 | 2690 | 2690 | 1    | sym  | 2947 | 1926 | 1.53 |
| Control | 126 | 3162 | 2166 | 1.46 | sym  | 2551 | 2384 | 1.07 |
| Control | 127 | 3176 | 3609 | 0.88 | sym  | 3374 | 3628 | 0.93 |

|         |     |      |      |      |      |      |      |      |
|---------|-----|------|------|------|------|------|------|------|
| Control | 129 | 2658 | 1760 | 1.51 | sym  | 1896 | 1003 | 1.89 |
| Control | 130 | 1810 | 1425 | 1.27 | sym  | 3289 | 2610 | 1.26 |
| Control | 131 | 1925 | 1250 | 1.54 | sym  | 2985 | 1843 | 1.62 |
| Control | 132 | 3451 | 1030 | 3.35 | asym | 2121 | 465  | 4.56 |
| Control | 133 | 3346 | 2040 | 1.64 | sym  | 2266 | 1717 | 1.32 |
| Control | 134 | 3092 | 2103 | 1.47 | sym  | 3065 | 3693 | 0.83 |
| Control | 135 | 3011 | 2214 | 1.36 | sym  | 2301 | 1609 | 1.43 |
| Control | 136 | 2657 | 3201 | 0.83 | sym  | 1881 | 1094 | 1.72 |
| Control | 137 | 3157 | 1716 | 1.84 | sym  | 2871 | 1511 | 1.9  |
| Control | 138 | 2490 | 2895 | 0.86 | sym  | 2319 | 2697 | 0.86 |
| Control | 139 | 2445 | 416  | 5.88 | asym | 2627 | 977  | 2.69 |
| Control | 140 | 2281 | 1531 | 1.49 | sym  | 2806 | 2079 | 1.35 |
| Control | 141 | 1939 | 1657 | 1.17 | sym  | 2972 | 2022 | 1.47 |
| Control | 142 | 3500 | 3070 | 1.14 | sym  | 2809 | 2601 | 1.08 |
| Control | 143 | 2614 | 2355 | 1.11 | sym  | 2058 | 1255 | 1.64 |
| Control | 144 | 2268 | 2291 | 0.99 | sym  | 2820 | 2043 | 1.38 |
| Control | 145 | 2379 | 1359 | 1.75 | sym  | 2196 | 1248 | 1.76 |
| Control | 146 | 3392 | 874  | 3.88 | asym | 2437 | 543  | 4.49 |
| Control | 147 | 2071 | 1479 | 1.4  | sym  | 2944 | 1875 | 1.57 |
| Control | 148 | 2754 | 525  | 5.25 | asym | 3108 | 643  | 4.83 |
| Control | 149 | 2937 | 1971 | 1.49 | sym  | 3056 | 2137 | 1.43 |
| Control | 150 | 2482 | 2533 | 0.98 | sym  | 3312 | 1971 | 1.68 |
| Control | 151 | 2411 | 1000 | 2.41 | asym | 2008 | 854  | 2.35 |
| Control | 152 | 2880 | 2182 | 1.32 | sym  | 2464 | 1799 | 1.37 |
| Control | 153 | 2681 | 1473 | 1.82 | sym  | 2001 | 1493 | 1.34 |
| Control | 154 | 2190 | 1386 | 1.58 | sym  | 3313 | 2629 | 1.26 |
| Control | 155 | 2261 | 2660 | 0.85 | sym  | 2192 | 1231 | 1.78 |
| Control | 156 | 2246 | 2674 | 0.84 | sym  | 3466 | 2280 | 1.52 |
| Control | 157 | 3087 | 1966 | 1.57 | sym  | 2413 | 1499 | 1.61 |
| Control | 158 | 2081 | 1652 | 1.26 | sym  | 3058 | 2066 | 1.48 |
| Control | 159 | 1960 | 2108 | 0.93 | sym  | 2740 | 2045 | 1.34 |
| Control | 160 | 2895 | 1809 | 1.6  | sym  | 2237 | 1216 | 1.84 |
| Control | 161 | 3156 | 1793 | 1.76 | sym  | 2352 | 1976 | 1.19 |
| Control | 162 | 2900 | 767  | 3.78 | asym | 2584 | 695  | 3.72 |
| Control | 163 | 2399 | 453  | 5.3  | asym | 2050 | 468  | 4.38 |
| Control | 164 | 2595 | 1981 | 1.31 | sym  | 2824 | 2742 | 1.03 |
| Control | 165 | 3178 | 1681 | 1.89 | sym  | 2629 | 1919 | 1.37 |
| Control | 166 | 3273 | 837  | 3.91 | asym | 1955 | 483  | 4.05 |
| Control | 167 | 2719 | 564  | 4.82 | asym | 2751 | 542  | 5.08 |
| Control | 168 | 2746 | 1685 | 1.63 | sym  | 3402 | 2062 | 1.65 |
| Control | 169 | 2203 | 2687 | 0.82 | sym  | 1925 | 1766 | 1.09 |
| Control | 170 | 2413 | 925  | 2.61 | asym | 3165 | 989  | 3.2  |
| Control | 171 | 2697 | 1615 | 1.67 | sym  | 2858 | 2071 | 1.38 |
| Control | 172 | 2143 | 1410 | 1.52 | sym  | 2991 | 1719 | 1.74 |
| Control | 173 | 3491 | 2090 | 1.67 | sym  | 2760 | 2442 | 1.13 |
| Control | 174 | 3107 | 1954 | 1.59 | sym  | 2414 | 2215 | 1.09 |
| Control | 175 | 2848 | 1548 | 1.84 | sym  | 2468 | 1505 | 1.64 |
| Control | 176 | 2229 | 1548 | 1.44 | sym  | 2533 | 2911 | 0.87 |
| Control | 177 | 3129 | 3068 | 1.02 | sym  | 2596 | 2570 | 1.01 |
| Control | 178 | 2709 | 1472 | 1.84 | sym  | 3463 | 2644 | 1.31 |
| Control | 179 | 1801 | 963  | 1.87 | sym  | 2628 | 1612 | 1.63 |
| Control | 180 | 3046 | 2649 | 1.15 | sym  | 2151 | 1793 | 1.2  |
| Control | 181 | 1894 | 1540 | 1.23 | sym  | 3063 | 3158 | 0.97 |
| Control | 182 | 2110 | 1327 | 1.59 | sym  | 2384 | 1419 | 1.68 |
| Control | 183 | 2553 | 3039 | 0.84 | sym  | 2466 | 2491 | 0.99 |
| Control | 184 | 2064 | 1876 | 1.1  | sym  | 1875 | 1065 | 1.76 |
| Control | 185 | 3250 | 625  | 5.2  | asym | 1932 | 358  | 5.4  |
| Control | 186 | 2310 | 1400 | 1.65 | sym  | 3264 | 2053 | 1.59 |
| Control | 187 | 2466 | 2202 | 1.12 | sym  | 3159 | 2273 | 1.39 |
| Control | 188 | 2087 | 1122 | 1.86 | sym  | 2877 | 1971 | 1.46 |
| Control | 189 | 1971 | 1760 | 1.12 | sym  | 2938 | 1738 | 1.69 |
| Control | 190 | 3111 | 3660 | 0.85 | sym  | 2403 | 1767 | 1.36 |
| Control | 191 | 3391 | 1916 | 1.77 | sym  | 3090 | 2272 | 1.36 |
| Control | 192 | 2914 | 2143 | 1.36 | sym  | 3183 | 2567 | 1.24 |

|         |     |      |      |      |      |      |      |      |
|---------|-----|------|------|------|------|------|------|------|
| Control | 194 | 2235 | 591  | 3.78 | asym | 3380 | 1496 | 2.26 |
| Control | 195 | 2282 | 1742 | 1.31 | sym  | 2158 | 1910 | 1.13 |
| Control | 196 | 2361 | 1802 | 1.31 | sym  | 2601 | 1723 | 1.51 |
| Control | 197 | 1905 | 355  | 5.36 | asym | 3497 | 1198 | 2.92 |
| Control | 198 | 3466 | 2729 | 1.27 | sym  | 2123 | 1464 | 1.45 |
| Control | 199 | 2907 | 1680 | 1.73 | sym  | 2203 | 1479 | 1.49 |
| Control | 200 | 2313 | 1217 | 1.9  | sym  | 1836 | 1043 | 1.76 |
| Control | 201 | 2000 | 1370 | 1.46 | sym  | 2518 | 2445 | 1.03 |
| Control | 202 | 3205 | 3815 | 0.84 | sym  | 3301 | 2186 | 1.51 |
| Control | 203 | 2401 | 1356 | 1.77 | sym  | 2922 | 3398 | 0.86 |
| Control | 204 | 1862 | 1648 | 1.13 | sym  | 2611 | 1459 | 1.79 |
| Control | 205 | 3248 | 1775 | 1.83 | sym  | 2684 | 3314 | 0.81 |
| Control | 206 | 3306 | 2486 | 1.33 | sym  | 2671 | 1639 | 1.63 |
| Control | 207 | 3302 | 2172 | 1.52 | sym  | 2639 | 1845 | 1.43 |
| Control | 208 | 2094 | 1360 | 1.54 | sym  | 1990 | 1442 | 1.38 |
| Control | 209 | 2570 | 2073 | 1.24 | sym  | 2408 | 1505 | 1.6  |
| Control | 210 | 2247 | 1235 | 1.82 | sym  | 3200 | 2105 | 1.52 |
| Control | 211 | 1881 | 541  | 3.48 | asym | 2472 | 422  | 5.86 |
| Control | 212 | 3258 | 2143 | 1.52 | sym  | 2906 | 2270 | 1.28 |
| Control | 213 | 1815 | 1911 | 0.95 | sym  | 3497 | 2082 | 1.68 |
| Control | 214 | 2767 | 3416 | 0.81 | sym  | 2547 | 2140 | 1.19 |
| Control | 215 | 2826 | 2298 | 1.23 | sym  | 3209 | 2395 | 1.34 |
| Control | 216 | 3184 | 2527 | 1.26 | sym  | 3204 | 1820 | 1.76 |
| Control | 217 | 2183 | 2373 | 0.92 | sym  | 2183 | 1292 | 1.69 |
| Control | 218 | 2830 | 2177 | 1.3  | sym  | 2848 | 2936 | 0.97 |
| Control | 219 | 2207 | 431  | 5.12 | asym | 2915 | 516  | 5.65 |
| Control | 220 | 1968 | 351  | 5.6  | asym | 2849 | 550  | 5.18 |
| Control | 221 | 2667 | 1551 | 1.72 | sym  | 3224 | 1874 | 1.72 |
| Control | 222 | 2955 | 988  | 2.99 | asym | 3322 | 616  | 5.39 |
| Control | 223 | 2737 | 805  | 3.4  | asym | 2397 | 794  | 3.02 |
| Control | 224 | 2848 | 2637 | 1.08 | sym  | 2754 | 3060 | 0.9  |
| Control | 225 | 3104 | 1222 | 2.54 | asym | 2636 | 938  | 2.81 |
| Control | 226 | 2749 | 2131 | 1.29 | sym  | 3024 | 1855 | 1.63 |
| Control | 227 | 3206 | 2672 | 1.2  | sym  | 2345 | 1484 | 1.58 |
| Control | 228 | 2673 | 1477 | 1.81 | sym  | 2890 | 1806 | 1.6  |
| Control | 229 | 3473 | 2395 | 1.45 | sym  | 1811 | 1522 | 1.19 |
| Control | 230 | 3318 | 1774 | 1.87 | sym  | 2168 | 2258 | 0.96 |
| Control | 231 | 2298 | 2525 | 0.91 | sym  | 3456 | 2638 | 1.31 |
| Control | 232 | 2073 | 680  | 3.05 | asym | 2353 | 582  | 4.04 |
| Control | 233 | 3291 | 1760 | 1.87 | sym  | 2329 | 2377 | 0.98 |
| Control | 234 | 2349 | 876  | 2.68 | asym | 2264 | 1029 | 2.2  |
| Control | 235 | 3143 | 2475 | 1.27 | sym  | 2133 | 1481 | 1.44 |
| Control | 236 | 1955 | 1157 | 1.69 | sym  | 2476 | 1528 | 1.62 |
| Control | 237 | 1857 | 2293 | 0.81 | sym  | 1922 | 1643 | 1.17 |
| Control | 238 | 1996 | 1188 | 1.68 | sym  | 3436 | 3818 | 0.9  |
| Control | 239 | 1892 | 464  | 4.08 | asym | 2949 | 838  | 3.52 |
| Control | 240 | 3248 | 1418 | 2.29 | asym | 3446 | 1188 | 2.9  |
| Control | 241 | 2356 | 1280 | 1.84 | sym  | 1940 | 1037 | 1.87 |
| Control | 242 | 3317 | 2154 | 1.54 | sym  | 3217 | 3459 | 0.93 |
| Control | 243 | 1947 | 1316 | 1.48 | sym  | 2290 | 2267 | 1.01 |
| Control | 244 | 2317 | 1566 | 1.48 | sym  | 2809 | 2265 | 1.24 |
| Control | 245 | 3444 | 2050 | 1.68 | sym  | 2221 | 2156 | 1.03 |
| Control | 246 | 1884 | 1346 | 1.4  | sym  | 2585 | 1873 | 1.38 |
| Control | 247 | 1892 | 1287 | 1.47 | sym  | 3119 | 2079 | 1.5  |
| Control | 248 | 2391 | 1449 | 1.65 | sym  | 2394 | 1515 | 1.58 |
| Control | 249 | 2586 | 1944 | 1.33 | sym  | 2553 | 2716 | 0.94 |
| Control | 250 | 3037 | 2712 | 1.12 | sym  | 2547 | 1676 | 1.52 |
| Control | 251 | 2730 | 1950 | 1.4  | sym  | 3374 | 3040 | 1.11 |
| Control | 252 | 2628 | 1918 | 1.37 | sym  | 1929 | 1484 | 1.3  |
| Control | 253 | 3355 | 2084 | 1.61 | sym  | 2562 | 1653 | 1.55 |
| Control | 254 | 2503 | 551  | 4.54 | asym | 3244 | 1495 | 2.17 |
| Control | 255 | 2539 | 530  | 4.79 | asym | 2620 | 630  | 4.16 |
| Control | 256 | 2493 | 523  | 4.77 | asym | 2461 | 776  | 3.17 |
| Control | 257 | 2513 | 2060 | 1.22 | sym  | 2514 | 1381 | 1.82 |

|         |     |      |      |      |      |      |      |      |
|---------|-----|------|------|------|------|------|------|------|
| Control | 259 | 3360 | 2453 | 1.37 | sym  | 3306 | 2066 | 1.6  |
| Control | 260 | 2222 | 1522 | 1.46 | sym  | 3133 | 3481 | 0.9  |
| Control | 261 | 2329 | 1465 | 1.59 | sym  | 2310 | 2139 | 1.08 |
| Control | 262 | 2658 | 3241 | 0.82 | sym  | 3012 | 1814 | 1.66 |
| Control | 263 | 2864 | 1618 | 1.77 | sym  | 1970 | 1728 | 1.14 |
| Control | 264 | 2269 | 2063 | 1.1  | sym  | 2194 | 1995 | 1.1  |
| Control | 265 | 3007 | 3580 | 0.84 | sym  | 2732 | 1598 | 1.71 |
| Control | 266 | 2761 | 2443 | 1.13 | sym  | 2710 | 1426 | 1.9  |
| Control | 267 | 2349 | 1577 | 1.49 | sym  | 3400 | 2446 | 1.39 |
| Control | 268 | 2802 | 3459 | 0.81 | sym  | 3300 | 1988 | 1.66 |
| Control | 269 | 3352 | 1832 | 1.83 | sym  | 2491 | 2265 | 1.1  |
| Control | 270 | 3302 | 557  | 5.93 | asym | 2319 | 562  | 4.13 |
| Control | 271 | 1944 | 1543 | 1.26 | sym  | 2609 | 1491 | 1.75 |
| Control | 272 | 3245 | 3311 | 0.98 | sym  | 2438 | 1340 | 1.82 |
| Control | 273 | 3498 | 1851 | 1.89 | sym  | 1948 | 1233 | 1.58 |
| Control | 274 | 2847 | 1260 | 2.26 | asym | 2091 | 349  | 5.99 |
| Control | 275 | 3486 | 3521 | 0.99 | sym  | 2894 | 2192 | 1.32 |
| Control | 276 | 1829 | 1005 | 1.82 | sym  | 3413 | 2566 | 1.33 |
| Control | 277 | 2693 | 1557 | 1.73 | sym  | 2860 | 1505 | 1.9  |
| Control | 278 | 2080 | 1496 | 1.39 | sym  | 2718 | 1477 | 1.84 |
| Control | 279 | 2699 | 1753 | 1.54 | sym  | 1860 | 1011 | 1.84 |
| Control | 280 | 3037 | 2025 | 1.5  | sym  | 3413 | 4214 | 0.81 |
| Control | 281 | 2965 | 1666 | 1.78 | sym  | 2721 | 1826 | 1.49 |
| Control | 282 | 1802 | 442  | 4.08 | asym | 2714 | 728  | 3.73 |
| Control | 283 | 2653 | 2551 | 1.04 | sym  | 2941 | 2557 | 1.15 |
| Control | 284 | 3113 | 566  | 5.5  | asym | 3349 | 823  | 4.07 |
| Control | 285 | 2222 | 1255 | 1.77 | sym  | 3327 | 1818 | 1.83 |
| Control | 286 | 2769 | 2472 | 1.12 | sym  | 3156 | 1948 | 1.62 |
| Control | 287 | 2557 | 2459 | 1.04 | sym  | 2465 | 2107 | 1.17 |
| Control | 288 | 2768 | 1896 | 1.46 | sym  | 2461 | 1367 | 1.8  |
| Control | 289 | 1808 | 766  | 2.36 | asym | 2198 | 541  | 4.06 |
| Control | 290 | 2298 | 427  | 5.38 | asym | 1859 | 392  | 4.74 |
| Control | 291 | 3382 | 1780 | 1.9  | sym  | 2679 | 1822 | 1.47 |
| Control | 292 | 3179 | 2890 | 1.1  | sym  | 2256 | 1455 | 1.55 |
| Control | 293 | 2892 | 2158 | 1.34 | sym  | 2551 | 2714 | 0.94 |
| Control | 294 | 1819 | 1051 | 1.73 | sym  | 3214 | 2157 | 1.49 |
| Control | 295 | 2550 | 2576 | 0.99 | sym  | 2303 | 1872 | 1.23 |
| Control | 296 | 2828 | 543  | 5.21 | asym | 2409 | 602  | 4    |
| Control | 297 | 2940 | 2450 | 1.2  | sym  | 2381 | 1452 | 1.64 |
| Control | 298 | 3125 | 642  | 4.87 | asym | 2261 | 704  | 3.21 |
| Control | 299 | 3421 | 3082 | 1.11 | sym  | 3222 | 1907 | 1.69 |
| Control | 300 | 2890 | 1184 | 2.44 | asym | 2708 | 865  | 3.13 |
| Control | 301 | 2555 | 1812 | 1.41 | sym  | 2063 | 1273 | 1.62 |
| Control | 302 | 2823 | 1613 | 1.75 | sym  | 2234 | 2327 | 0.96 |
| Control | 303 | 2109 | 1990 | 1.06 | sym  | 2444 | 1852 | 1.32 |
| Control | 304 | 2296 | 1713 | 1.34 | sym  | 3388 | 1802 | 1.88 |
| Control | 305 | 3123 | 645  | 4.84 | asym | 3201 | 606  | 5.28 |
| Control | 306 | 3304 | 1955 | 1.69 | sym  | 2484 | 2700 | 0.92 |
| Control | 307 | 2153 | 2175 | 0.99 | sym  | 2703 | 2112 | 1.28 |
| Control | 308 | 3355 | 3687 | 0.91 | sym  | 1897 | 2180 | 0.87 |
| Control | 309 | 3038 | 1841 | 1.65 | sym  | 2113 | 1993 | 1.06 |
| Control | 310 | 3051 | 3814 | 0.8  | sym  | 1868 | 1906 | 0.98 |
| Control | 311 | 2305 | 1953 | 1.18 | sym  | 3205 | 2041 | 1.57 |
| Control | 312 | 2712 | 1910 | 1.42 | sym  | 3143 | 3175 | 0.99 |
| Control | 313 | 3119 | 2495 | 1.25 | sym  | 2403 | 2379 | 1.01 |
| Control | 314 | 2335 | 2407 | 0.97 | sym  | 2148 | 1534 | 1.4  |
| Control | 315 | 1998 | 342  | 5.84 | asym | 2379 | 493  | 4.83 |
| Control | 316 | 2903 | 2903 | 1    | sym  | 3276 | 2100 | 1.56 |
| Control | 317 | 2619 | 1455 | 1.8  | sym  | 3343 | 1868 | 1.79 |
| Control | 318 | 2486 | 1680 | 1.48 | sym  | 1952 | 1276 | 1.53 |
| Control | 319 | 2101 | 1236 | 1.7  | sym  | 2968 | 3451 | 0.86 |
| Control | 320 | 1964 | 1183 | 1.66 | sym  | 2684 | 1459 | 1.84 |
| Control | 321 | 2506 | 1160 | 2.16 | asym | 2567 | 626  | 4.1  |
| Control | 322 | 2365 | 1739 | 1.36 | sym  | 2171 | 2360 | 0.92 |

|         |     |      |      |      |      |      |      |      |
|---------|-----|------|------|------|------|------|------|------|
| Control | 324 | 1880 | 1649 | 1.14 | sym  | 2748 | 1750 | 1.57 |
| Control | 325 | 2174 | 389  | 5.59 | asym | 2799 | 617  | 4.54 |
| Control | 326 | 3123 | 1805 | 1.73 | sym  | 1827 | 2201 | 0.83 |
| Control | 327 | 2682 | 879  | 3.05 | asym | 2202 | 472  | 4.67 |
| Control | 328 | 2719 | 1618 | 1.68 | sym  | 3249 | 2620 | 1.24 |
| Control | 329 | 3496 | 1942 | 1.8  | sym  | 1928 | 1268 | 1.52 |
| Control | 330 | 2780 | 2989 | 0.93 | sym  | 1935 | 1697 | 1.14 |
| Control | 331 | 3470 | 1130 | 3.07 | asym | 3496 | 695  | 5.03 |
| Control | 332 | 3395 | 3031 | 1.12 | sym  | 2181 | 1628 | 1.34 |
| Control | 333 | 3027 | 3027 | 1    | sym  | 3222 | 2369 | 1.36 |
| Control | 334 | 1874 | 1368 | 1.37 | sym  | 2700 | 2842 | 0.95 |
| Control | 335 | 2929 | 2525 | 1.16 | sym  | 3136 | 1659 | 1.89 |
| Control | 336 | 2779 | 1726 | 1.61 | sym  | 3301 | 1844 | 1.79 |
| Control | 337 | 2053 | 1466 | 1.4  | sym  | 2246 | 1664 | 1.35 |
| Control | 338 | 2922 | 2757 | 1.06 | sym  | 2869 | 1603 | 1.79 |
| Control | 339 | 2236 | 1895 | 1.18 | sym  | 1997 | 1637 | 1.22 |
| Control | 340 | 2681 | 1686 | 1.59 | sym  | 1817 | 1101 | 1.65 |
| Control | 341 | 1970 | 1539 | 1.28 | sym  | 2670 | 1475 | 1.81 |
| Control | 342 | 2616 | 3152 | 0.83 | sym  | 3082 | 2828 | 1.09 |
| Control | 343 | 2995 | 2155 | 1.39 | sym  | 1915 | 1189 | 1.61 |
| Control | 344 | 2700 | 1561 | 1.73 | sym  | 2642 | 2841 | 0.93 |
| Control | 345 | 2942 | 2015 | 1.46 | sym  | 2466 | 1417 | 1.74 |
| Control | 346 | 3010 | 1701 | 1.77 | sym  | 2239 | 1309 | 1.71 |
| Control | 347 | 2093 | 2352 | 0.89 | sym  | 2657 | 2739 | 0.97 |
| Control | 348 | 2598 | 1382 | 1.88 | sym  | 2280 | 1281 | 1.78 |
| Control | 349 | 2559 | 2133 | 1.2  | sym  | 2443 | 2143 | 1.14 |
| Control | 350 | 2006 | 1208 | 1.66 | sym  | 2863 | 3253 | 0.88 |
| Control | 351 | 2897 | 2281 | 1.27 | sym  | 3345 | 3758 | 0.89 |
| Control | 352 | 2734 | 1698 | 1.61 | sym  | 2571 | 2857 | 0.9  |
| Control | 353 | 3238 | 3304 | 0.98 | sym  | 1873 | 1171 | 1.6  |
| Control | 354 | 2758 | 3363 | 0.82 | sym  | 2377 | 1415 | 1.68 |
| Control | 355 | 2191 | 1238 | 1.77 | sym  | 3325 | 2681 | 1.24 |
| Control | 356 | 2746 | 655  | 4.19 | asym | 3494 | 826  | 4.23 |
| Control | 357 | 2428 | 554  | 4.38 | asym | 2953 | 542  | 5.45 |
| Control | 358 | 3449 | 2142 | 1.61 | sym  | 1990 | 2052 | 0.97 |
| Control | 359 | 2172 | 1825 | 1.19 | sym  | 3081 | 1802 | 1.71 |
| Control | 360 | 2420 | 1936 | 1.25 | sym  | 3330 | 2108 | 1.58 |
| Control | 361 | 2018 | 1564 | 1.29 | sym  | 3205 | 2671 | 1.2  |
| Control | 362 | 2184 | 2482 | 0.88 | sym  | 2679 | 2435 | 1.1  |
| Control | 363 | 2633 | 1155 | 2.28 | asym | 3209 | 829  | 3.87 |
| Control | 364 | 3434 | 2056 | 1.67 | sym  | 2322 | 1759 | 1.32 |
| Control | 365 | 2382 | 481  | 4.95 | asym | 2288 | 468  | 4.89 |
| Control | 366 | 2636 | 2995 | 0.88 | sym  | 3381 | 1989 | 1.7  |
| Control | 367 | 1816 | 2215 | 0.82 | sym  | 2286 | 1621 | 1.41 |
| Control | 368 | 3161 | 2359 | 1.34 | sym  | 2315 | 1323 | 1.75 |
| Control | 369 | 2620 | 1871 | 1.4  | sym  | 2394 | 1434 | 1.67 |
| Control | 370 | 2713 | 1821 | 1.49 | sym  | 2868 | 2241 | 1.28 |
| Control | 371 | 3172 | 1792 | 1.77 | sym  | 2696 | 1774 | 1.52 |
| Control | 372 | 2903 | 2962 | 0.98 | sym  | 1981 | 1942 | 1.02 |
| Control | 373 | 2517 | 749  | 3.36 | asym | 2659 | 872  | 3.05 |
| Control | 374 | 2266 | 2490 | 0.91 | sym  | 2403 | 1613 | 1.49 |
| Control | 375 | 2439 | 2279 | 1.07 | sym  | 2588 | 1737 | 1.49 |
| Control | 376 | 3135 | 721  | 4.35 | asym | 1834 | 340  | 5.39 |
| Control | 377 | 3268 | 2971 | 1.1  | sym  | 3186 | 1741 | 1.83 |
| Control | 378 | 2954 | 2503 | 1.18 | sym  | 1862 | 2046 | 0.91 |
| Control | 379 | 2130 | 2477 | 0.86 | sym  | 2611 | 1527 | 1.71 |
| Control | 380 | 1879 | 374  | 5.02 | asym | 2575 | 466  | 5.53 |
| Control | 381 | 2655 | 2682 | 0.99 | sym  | 2711 | 1549 | 1.75 |
| Control | 382 | 2045 | 2045 | 1    | sym  | 2889 | 1632 | 1.77 |
| Control | 383 | 3385 | 2170 | 1.56 | sym  | 2403 | 1350 | 1.78 |
| Control | 384 | 3079 | 3755 | 0.82 | sym  | 2199 | 1679 | 1.31 |
| Control | 385 | 2070 | 1203 | 1.72 | sym  | 2053 | 1866 | 1.1  |
| Control | 386 | 3304 | 2310 | 1.43 | sym  | 3413 | 2798 | 1.22 |
| Control | 387 | 2886 | 3436 | 0.84 | sym  | 2669 | 1920 | 1.39 |



|         |     |      |      |      |      |      |      |      |
|---------|-----|------|------|------|------|------|------|------|
| Control | 389 | 2610 | 2175 | 1.2  | sym  | 3178 | 2354 | 1.35 |
| Control | 390 | 1860 | 541  | 3.44 | asym | 2859 | 1311 | 2.18 |
| Control | 391 | 2044 | 1450 | 1.41 | sym  | 2312 | 2046 | 1.13 |
| Control | 392 | 3481 | 1832 | 1.9  | sym  | 3477 | 3104 | 1.12 |
| Control | 393 | 2512 | 2026 | 1.24 | sym  | 3085 | 1763 | 1.75 |
| Control | 394 | 3429 | 2198 | 1.56 | sym  | 3440 | 1988 | 1.73 |
| Control | 395 | 3369 | 2054 | 1.64 | sym  | 2271 | 2083 | 1.09 |
| Control | 396 | 2236 | 2150 | 1.04 | sym  | 2456 | 1847 | 1.33 |
| Control | 397 | 3151 | 3890 | 0.81 | sym  | 2992 | 2168 | 1.38 |
| Control | 398 | 2508 | 1706 | 1.47 | sym  | 2697 | 3330 | 0.81 |
| Control | 399 | 2846 | 2062 | 1.38 | sym  | 3215 | 2923 | 1.1  |
| Control | 400 | 1968 | 1929 | 1.02 | sym  | 2651 | 2574 | 1.03 |

Journal Pre-proof

| Group   | Pair cell No. | BrdU intensive value |             | Relative value | Pair cell type |
|---------|---------------|----------------------|-------------|----------------|----------------|
|         |               | First cell           | Second cell |                |                |
| SOX9 KO | 1             | 1941                 | 376         | 5.16           | asym           |
| SOX9 KO | 2             | 3117                 | 1218        | 2.56           | asym           |
| SOX9 KO | 3             | 2198                 | 1316        | 1.67           | sym            |
| SOX9 KO | 4             | 2856                 | 1843        | 1.55           | sym            |
| SOX9 KO | 5             | 3027                 | 2481        | 1.22           | sym            |
| SOX9 KO | 6             | 3437                 | 2728        | 1.26           | sym            |
| SOX9 KO | 7             | 3364                 | 667         | 5.04           | asym           |
| SOX9 KO | 8             | 3000                 | 1389        | 2.16           | asym           |
| SOX9 KO | 9             | 2377                 | 940         | 2.53           | asym           |
| SOX9 KO | 10            | 3076                 | 1636        | 1.88           | sym            |
| SOX9 KO | 11            | 2595                 | 1663        | 1.56           | sym            |
| SOX9 KO | 12            | 2974                 | 1957        | 1.52           | sym            |
| SOX9 KO | 13            | 2656                 | 656         | 4.05           | asym           |
| SOX9 KO | 14            | 1982                 | 1802        | 1.1            | sym            |
| SOX9 KO | 15            | 3328                 | 616         | 5.4            | asym           |
| SOX9 KO | 16            | 2958                 | 1946        | 1.52           | sym            |
| SOX9 KO | 17            | 1840                 | 1219        | 1.51           | sym            |
| SOX9 KO | 18            | 2617                 | 579         | 4.52           | asym           |
| SOX9 KO | 19            | 3222                 | 3465        | 0.93           | sym            |
| SOX9 KO | 20            | 2981                 | 3205        | 0.93           | sym            |
| SOX9 KO | 21            | 2327                 | 573         | 4.06           | asym           |
| SOX9 KO | 22            | 2957                 | 1565        | 1.89           | sym            |
| SOX9 KO | 23            | 3099                 | 781         | 3.97           | asym           |
| SOX9 KO | 24            | 3044                 | 650         | 4.68           | asym           |
| SOX9 KO | 25            | 2335                 | 571         | 4.09           | asym           |
| SOX9 KO | 26            | 2278                 | 598         | 3.81           | asym           |
| SOX9 KO | 27            | 3029                 | 1383        | 2.19           | asym           |
| SOX9 KO | 28            | 2712                 | 779         | 3.48           | asym           |
| SOX9 KO | 29            | 3252                 | 705         | 4.61           | asym           |
| SOX9 KO | 30            | 2003                 | 371         | 5.4            | asym           |
| SOX9 KO | 31            | 2415                 | 2569        | 0.94           | sym            |
| SOX9 KO | 32            | 2069                 | 568         | 3.64           | asym           |
| SOX9 KO | 33            | 2689                 | 594         | 4.53           | asym           |
| SOX9 KO | 34            | 3464                 | 1462        | 2.37           | asym           |
| SOX9 KO | 35            | 2678                 | 847         | 3.16           | asym           |
| SOX9 KO | 36            | 2078                 | 1201        | 1.73           | sym            |
| SOX9 KO | 37            | 2308                 | 485         | 4.76           | asym           |
| SOX9 KO | 38            | 3328                 | 2706        | 1.23           | sym            |
| SOX9 KO | 39            | 3167                 | 583         | 5.43           | asym           |
| SOX9 KO | 40            | 2172                 | 481         | 4.52           | asym           |
| SOX9 KO | 41            | 3012                 | 578         | 5.21           | asym           |
| SOX9 KO | 42            | 3150                 | 625         | 5.04           | asym           |
| SOX9 KO | 43            | 2587                 | 775         | 3.34           | asym           |
| SOX9 KO | 44            | 3248                 | 2017        | 1.61           | sym            |
| SOX9 KO | 45            | 2474                 | 453         | 5.46           | asym           |
| SOX9 KO | 46            | 2617                 | 1407        | 1.86           | sym            |
| SOX9 KO | 47            | 2821                 | 504         | 5.6            | asym           |
| SOX9 KO | 48            | 3245                 | 1330        | 2.44           | asym           |
| SOX9 KO | 49            | 2146                 | 848         | 2.53           | asym           |
| SOX9 KO | 50            | 3366                 | 651         | 5.17           | asym           |
| SOX9 KO | 51            | 2200                 | 2366        | 0.93           | sym            |
| SOX9 KO | 52            | 2470                 | 1395        | 1.77           | sym            |
| SOX9 KO | 53            | 3032                 | 2263        | 1.34           | sym            |
| SOX9 KO | 54            | 2516                 | 1966        | 1.28           | sym            |
| SOX9 KO | 55            | 2788                 | 1991        | 1.4            | sym            |
| SOX9 KO | 56            | 3358                 | 3462        | 0.97           | sym            |

|         |     |      |      |      |      |
|---------|-----|------|------|------|------|
| SOX9 KO | 58  | 2588 | 508  | 5.09 | asym |
| SOX9 KO | 59  | 2131 | 451  | 4.72 | asym |
| SOX9 KO | 60  | 2148 | 585  | 3.67 | asym |
| SOX9 KO | 61  | 3092 | 1137 | 2.72 | asym |
| SOX9 KO | 62  | 2350 | 1478 | 1.59 | sym  |
| SOX9 KO | 63  | 2188 | 629  | 3.48 | asym |
| SOX9 KO | 64  | 2198 | 2290 | 0.96 | sym  |
| SOX9 KO | 65  | 1948 | 858  | 2.27 | asym |
| SOX9 KO | 66  | 2178 | 1259 | 1.73 | sym  |
| SOX9 KO | 67  | 3322 | 2013 | 1.65 | sym  |
| SOX9 KO | 68  | 2782 | 580  | 4.8  | asym |
| SOX9 KO | 69  | 2281 | 715  | 3.19 | asym |
| SOX9 KO | 70  | 3481 | 808  | 4.31 | asym |
| SOX9 KO | 71  | 2587 | 652  | 3.97 | asym |
| SOX9 KO | 72  | 2429 | 2270 | 1.07 | sym  |
| SOX9 KO | 73  | 2556 | 779  | 3.28 | asym |
| SOX9 KO | 74  | 2889 | 1670 | 1.73 | sym  |
| SOX9 KO | 75  | 1988 | 1274 | 1.56 | sym  |
| SOX9 KO | 76  | 2660 | 1478 | 1.8  | sym  |
| SOX9 KO | 77  | 2709 | 1894 | 1.43 | sym  |
| SOX9 KO | 78  | 2260 | 816  | 2.77 | asym |
| SOX9 KO | 79  | 3170 | 1093 | 2.9  | asym |
| SOX9 KO | 80  | 2625 | 629  | 4.17 | asym |
| SOX9 KO | 81  | 1825 | 2028 | 0.9  | sym  |
| SOX9 KO | 82  | 3183 | 784  | 4.06 | asym |
| SOX9 KO | 83  | 3488 | 1373 | 2.54 | asym |
| SOX9 KO | 84  | 3245 | 613  | 5.29 | asym |
| SOX9 KO | 85  | 1992 | 806  | 2.47 | asym |
| SOX9 KO | 86  | 2874 | 762  | 3.77 | asym |
| SOX9 KO | 87  | 1803 | 1431 | 1.26 | sym  |
| SOX9 KO | 88  | 3007 | 1166 | 2.58 | asym |
| SOX9 KO | 89  | 3097 | 704  | 4.4  | asym |
| SOX9 KO | 90  | 2250 | 1184 | 1.9  | sym  |
| SOX9 KO | 91  | 3361 | 2141 | 1.57 | sym  |
| SOX9 KO | 92  | 2940 | 2854 | 1.03 | sym  |
| SOX9 KO | 93  | 2430 | 445  | 5.46 | asym |
| SOX9 KO | 94  | 3225 | 574  | 5.62 | asym |
| SOX9 KO | 95  | 3155 | 643  | 4.91 | asym |
| SOX9 KO | 96  | 2182 | 669  | 3.26 | asym |
| SOX9 KO | 97  | 3122 | 745  | 4.19 | asym |
| SOX9 KO | 98  | 2553 | 468  | 5.46 | asym |
| SOX9 KO | 99  | 3146 | 1392 | 2.26 | asym |
| SOX9 KO | 100 | 2782 | 1572 | 1.77 | sym  |
| SOX9 KO | 101 | 3083 | 554  | 5.56 | asym |
| SOX9 KO | 102 | 2208 | 1920 | 1.15 | sym  |
| SOX9 KO | 103 | 3225 | 1812 | 1.78 | sym  |
| SOX9 KO | 104 | 2054 | 382  | 5.38 | asym |
| SOX9 KO | 105 | 2517 | 760  | 3.31 | asym |
| SOX9 KO | 106 | 2509 | 839  | 2.99 | asym |
| SOX9 KO | 107 | 2495 | 2572 | 0.97 | sym  |
| SOX9 KO | 108 | 3122 | 3673 | 0.85 | sym  |
| SOX9 KO | 109 | 2963 | 2622 | 1.13 | sym  |
| SOX9 KO | 110 | 2065 | 383  | 5.39 | asym |
| SOX9 KO | 111 | 2115 | 480  | 4.41 | asym |
| SOX9 KO | 112 | 2600 | 720  | 3.61 | asym |
| SOX9 KO | 113 | 3425 | 730  | 4.69 | asym |
| SOX9 KO | 114 | 2410 | 1435 | 1.68 | sym  |
| SOX9 KO | 115 | 1972 | 1210 | 1.63 | sym  |

|         |     |      |      |      |      |
|---------|-----|------|------|------|------|
| SOX9 KO | 117 | 1826 | 321  | 5.68 | asym |
| SOX9 KO | 118 | 1975 | 1110 | 1.78 | sym  |
| SOX9 KO | 119 | 2049 | 479  | 4.28 | asym |
| SOX9 KO | 120 | 2582 | 1555 | 1.66 | sym  |
| SOX9 KO | 121 | 3043 | 1602 | 1.9  | sym  |
| SOX9 KO | 122 | 2090 | 391  | 5.35 | asym |
| SOX9 KO | 123 | 2501 | 451  | 5.55 | asym |
| SOX9 KO | 124 | 2207 | 968  | 2.28 | asym |
| SOX9 KO | 125 | 1834 | 413  | 4.44 | asym |
| SOX9 KO | 126 | 2770 | 772  | 3.59 | asym |
| SOX9 KO | 127 | 2904 | 955  | 3.04 | asym |
| SOX9 KO | 128 | 3198 | 2479 | 1.29 | sym  |
| SOX9 KO | 129 | 3239 | 897  | 3.61 | asym |
| SOX9 KO | 130 | 3166 | 2261 | 1.4  | sym  |
| SOX9 KO | 131 | 2372 | 866  | 2.74 | asym |
| SOX9 KO | 132 | 3019 | 2340 | 1.29 | sym  |
| SOX9 KO | 133 | 2794 | 2636 | 1.06 | sym  |
| SOX9 KO | 134 | 3182 | 642  | 4.96 | asym |
| SOX9 KO | 135 | 2791 | 771  | 3.62 | asym |
| SOX9 KO | 136 | 2353 | 550  | 4.28 | asym |
| SOX9 KO | 137 | 2451 | 494  | 4.96 | asym |
| SOX9 KO | 138 | 2556 | 833  | 3.07 | asym |
| SOX9 KO | 139 | 2323 | 1873 | 1.24 | sym  |
| SOX9 KO | 140 | 2563 | 443  | 5.78 | asym |
| SOX9 KO | 141 | 2046 | 377  | 5.43 | asym |
| SOX9 KO | 142 | 2284 | 2217 | 1.03 | sym  |
| SOX9 KO | 143 | 2705 | 998  | 2.71 | asym |
| SOX9 KO | 144 | 3414 | 864  | 3.95 | asym |
| SOX9 KO | 145 | 2073 | 587  | 3.53 | asym |
| SOX9 KO | 146 | 2395 | 2158 | 1.11 | sym  |
| SOX9 KO | 147 | 2984 | 3209 | 0.93 | sym  |
| SOX9 KO | 148 | 1939 | 1310 | 1.48 | sym  |
| SOX9 KO | 149 | 2280 | 1281 | 1.78 | sym  |
| SOX9 KO | 150 | 2617 | 622  | 4.21 | asym |
| SOX9 KO | 151 | 2307 | 1775 | 1.3  | sym  |
| SOX9 KO | 152 | 3424 | 667  | 5.13 | asym |
| SOX9 KO | 153 | 3321 | 3047 | 1.09 | sym  |
| SOX9 KO | 154 | 3380 | 1910 | 1.77 | sym  |
| SOX9 KO | 155 | 2280 | 473  | 4.82 | asym |
| SOX9 KO | 156 | 2628 | 672  | 3.91 | asym |
| SOX9 KO | 157 | 3084 | 1928 | 1.6  | sym  |
| SOX9 KO | 158 | 2378 | 513  | 4.64 | asym |
| SOX9 KO | 159 | 3311 | 1254 | 2.64 | asym |
| SOX9 KO | 160 | 3063 | 649  | 4.72 | asym |
| SOX9 KO | 161 | 2565 | 463  | 5.54 | asym |
| SOX9 KO | 162 | 1819 | 989  | 1.84 | sym  |
| SOX9 KO | 163 | 3303 | 3270 | 1.01 | sym  |
| SOX9 KO | 164 | 3354 | 1114 | 3.01 | asym |
| SOX9 KO | 165 | 2984 | 1018 | 2.93 | asym |
| SOX9 KO | 166 | 2136 | 2373 | 0.9  | sym  |
| SOX9 KO | 167 | 3340 | 2715 | 1.23 | sym  |
| SOX9 KO | 168 | 2383 | 407  | 5.86 | asym |
| SOX9 KO | 169 | 2169 | 540  | 4.02 | asym |
| SOX9 KO | 170 | 2086 | 2426 | 0.86 | sym  |
| SOX9 KO | 171 | 2555 | 574  | 4.45 | asym |
| SOX9 KO | 172 | 2315 | 429  | 5.39 | asym |
| SOX9 KO | 173 | 3319 | 1424 | 2.33 | asym |
| SOX9 KO | 174 | 3186 | 3319 | 0.96 | sym  |

|         |     |      |      |      |      |
|---------|-----|------|------|------|------|
| SOX9 KO | 176 | 2876 | 667  | 4.31 | asym |
| SOX9 KO | 177 | 3409 | 1904 | 1.79 | sym  |
| SOX9 KO | 178 | 2583 | 873  | 2.96 | asym |
| SOX9 KO | 179 | 1968 | 663  | 2.97 | asym |
| SOX9 KO | 180 | 2043 | 625  | 3.27 | asym |
| SOX9 KO | 181 | 2353 | 474  | 4.96 | asym |
| SOX9 KO | 182 | 3293 | 1444 | 2.28 | asym |
| SOX9 KO | 183 | 2115 | 2299 | 0.92 | sym  |
| SOX9 KO | 184 | 3383 | 1151 | 2.94 | asym |
| SOX9 KO | 185 | 1802 | 1201 | 1.5  | sym  |
| SOX9 KO | 186 | 2499 | 980  | 2.55 | asym |
| SOX9 KO | 187 | 3493 | 587  | 5.95 | asym |
| SOX9 KO | 188 | 3285 | 2119 | 1.55 | sym  |
| SOX9 KO | 189 | 2023 | 472  | 4.29 | asym |
| SOX9 KO | 190 | 2566 | 470  | 5.46 | asym |
| SOX9 KO | 191 | 2757 | 691  | 3.99 | asym |
| SOX9 KO | 192 | 2024 | 830  | 2.44 | asym |
| SOX9 KO | 193 | 2739 | 473  | 5.79 | asym |
| SOX9 KO | 194 | 2812 | 2083 | 1.35 | sym  |
| SOX9 KO | 195 | 3363 | 2014 | 1.67 | sym  |
| SOX9 KO | 196 | 3340 | 1290 | 2.59 | asym |
| SOX9 KO | 197 | 2536 | 2438 | 1.04 | sym  |
| SOX9 KO | 198 | 1962 | 352  | 5.58 | asym |
| SOX9 KO | 199 | 3459 | 3391 | 1.02 | sym  |
| SOX9 KO | 200 | 2612 | 665  | 3.93 | asym |
| SOX9 KO | 201 | 2318 | 453  | 5.12 | asym |
| SOX9 KO | 202 | 3045 | 793  | 3.84 | asym |
| SOX9 KO | 203 | 3156 | 2238 | 1.41 | sym  |
| SOX9 KO | 204 | 3062 | 619  | 4.95 | asym |
| SOX9 KO | 205 | 3477 | 726  | 4.79 | asym |
| SOX9 KO | 206 | 3123 | 594  | 5.26 | asym |
| SOX9 KO | 207 | 1847 | 2030 | 0.91 | sym  |
| SOX9 KO | 208 | 2541 | 761  | 3.34 | asym |
| SOX9 KO | 209 | 2389 | 438  | 5.46 | asym |
| SOX9 KO | 210 | 3397 | 1297 | 2.62 | asym |
| SOX9 KO | 211 | 1826 | 1373 | 1.33 | sym  |
| SOX9 KO | 212 | 2087 | 614  | 3.4  | asym |
| SOX9 KO | 213 | 1804 | 449  | 4.02 | asym |
| SOX9 KO | 214 | 2913 | 573  | 5.08 | asym |
| SOX9 KO | 215 | 2781 | 1225 | 2.27 | asym |
| SOX9 KO | 216 | 2692 | 1276 | 2.11 | asym |
| SOX9 KO | 217 | 3484 | 723  | 4.82 | asym |
| SOX9 KO | 218 | 3426 | 632  | 5.42 | asym |
| SOX9 KO | 219 | 1905 | 1305 | 1.46 | sym  |
| SOX9 KO | 220 | 3080 | 1890 | 1.63 | sym  |
| SOX9 KO | 221 | 2794 | 670  | 4.17 | asym |
| SOX9 KO | 222 | 2771 | 2235 | 1.24 | sym  |
| SOX9 KO | 223 | 3432 | 1816 | 1.89 | sym  |
| SOX9 KO | 224 | 2976 | 783  | 3.8  | asym |
| SOX9 KO | 225 | 2107 | 2479 | 0.85 | sym  |
| SOX9 KO | 226 | 2966 | 610  | 4.86 | asym |
| SOX9 KO | 227 | 1889 | 583  | 3.24 | asym |
| SOX9 KO | 228 | 2656 | 539  | 4.93 | asym |
| SOX9 KO | 229 | 3230 | 571  | 5.66 | asym |
| SOX9 KO | 230 | 3311 | 883  | 3.75 | asym |
| SOX9 KO | 231 | 2719 | 479  | 5.68 | asym |
| SOX9 KO | 232 | 2953 | 3434 | 0.86 | sym  |
| SOX9 KO | 233 | 2578 | 2604 | 0.99 | sym  |

|         |     |      |      |      |      |
|---------|-----|------|------|------|------|
| SOX9 KO | 235 | 2897 | 705  | 4.11 | asym |
| SOX9 KO | 236 | 3335 | 929  | 3.59 | asym |
| SOX9 KO | 237 | 3274 | 895  | 3.66 | asym |
| SOX9 KO | 238 | 3070 | 645  | 4.76 | asym |
| SOX9 KO | 239 | 2238 | 2487 | 0.9  | sym  |
| SOX9 KO | 240 | 2399 | 1904 | 1.26 | sym  |
| SOX9 KO | 241 | 2191 | 456  | 4.8  | asym |
| SOX9 KO | 242 | 1837 | 371  | 4.95 | asym |
| SOX9 KO | 243 | 2490 | 669  | 3.72 | asym |
| SOX9 KO | 244 | 2176 | 651  | 3.34 | asym |
| SOX9 KO | 245 | 2262 | 2308 | 0.98 | sym  |
| SOX9 KO | 246 | 2616 | 767  | 3.41 | asym |
| SOX9 KO | 247 | 2841 | 514  | 5.53 | asym |
| SOX9 KO | 248 | 1959 | 723  | 2.71 | asym |
| SOX9 KO | 249 | 2411 | 709  | 3.4  | asym |
| SOX9 KO | 250 | 2577 | 880  | 2.93 | asym |
| SOX9 KO | 251 | 3263 | 2161 | 1.51 | sym  |
| SOX9 KO | 252 | 2210 | 2105 | 1.05 | sym  |
| SOX9 KO | 253 | 2984 | 1421 | 2.1  | asym |
| SOX9 KO | 254 | 3319 | 2423 | 1.37 | sym  |
| SOX9 KO | 255 | 3338 | 2211 | 1.51 | sym  |
| SOX9 KO | 256 | 3344 | 3278 | 1.02 | sym  |
| SOX9 KO | 257 | 3057 | 815  | 3.75 | asym |
| SOX9 KO | 258 | 3352 | 2841 | 1.18 | sym  |
| SOX9 KO | 259 | 2795 | 541  | 5.17 | asym |
| SOX9 KO | 260 | 2457 | 1718 | 1.43 | sym  |
| SOX9 KO | 261 | 2302 | 460  | 5    | asym |
| SOX9 KO | 262 | 2582 | 1528 | 1.69 | sym  |
| SOX9 KO | 263 | 2460 | 687  | 3.58 | asym |
| SOX9 KO | 264 | 3440 | 953  | 3.61 | asym |
| SOX9 KO | 265 | 3411 | 927  | 3.68 | asym |
| SOX9 KO | 266 | 2563 | 520  | 4.93 | asym |
| SOX9 KO | 267 | 2009 | 337  | 5.96 | asym |
| SOX9 KO | 268 | 2532 | 917  | 2.76 | asym |
| SOX9 KO | 269 | 2872 | 748  | 3.84 | asym |
| SOX9 KO | 270 | 2817 | 2584 | 1.09 | sym  |
| SOX9 KO | 271 | 3114 | 2133 | 1.46 | sym  |
| SOX9 KO | 272 | 1946 | 597  | 3.26 | asym |
| SOX9 KO | 273 | 2905 | 1210 | 2.4  | asym |
| SOX9 KO | 274 | 2675 | 1884 | 1.42 | sym  |
| SOX9 KO | 275 | 1809 | 521  | 3.47 | asym |
| SOX9 KO | 276 | 2018 | 1614 | 1.25 | sym  |
| SOX9 KO | 277 | 1834 | 385  | 4.76 | asym |
| SOX9 KO | 278 | 2434 | 406  | 6    | asym |
| SOX9 KO | 279 | 2390 | 885  | 2.7  | asym |
| SOX9 KO | 280 | 2827 | 1234 | 2.29 | asym |
| SOX9 KO | 281 | 2890 | 737  | 3.92 | asym |
| SOX9 KO | 282 | 2614 | 1502 | 1.74 | sym  |
| SOX9 KO | 283 | 2595 | 505  | 5.14 | asym |
| SOX9 KO | 284 | 3007 | 3456 | 0.87 | sym  |
| SOX9 KO | 285 | 2788 | 1532 | 1.82 | sym  |
| SOX9 KO | 286 | 2862 | 984  | 2.91 | asym |
| SOX9 KO | 287 | 2478 | 2193 | 1.13 | sym  |
| SOX9 KO | 288 | 2464 | 523  | 4.71 | asym |
| SOX9 KO | 289 | 1999 | 1058 | 1.89 | sym  |
| SOX9 KO | 290 | 2352 | 2283 | 1.03 | sym  |
| SOX9 KO | 291 | 1829 | 553  | 3.31 | asym |
| SOX9 KO | 292 | 1973 | 415  | 4.75 | asym |

|         |     |      |      |      |      |
|---------|-----|------|------|------|------|
| SOX9 KO | 294 | 2252 | 1272 | 1.77 | sym  |
| SOX9 KO | 295 | 2082 | 352  | 5.91 | asym |
| SOX9 KO | 296 | 2352 | 1600 | 1.47 | sym  |
| SOX9 KO | 297 | 2326 | 541  | 4.3  | asym |
| SOX9 KO | 298 | 2670 | 1534 | 1.74 | sym  |
| SOX9 KO | 299 | 2928 | 1042 | 2.81 | asym |
| SOX9 KO | 300 | 2340 | 1671 | 1.4  | sym  |
| SOX9 KO | 301 | 1824 | 577  | 3.16 | asym |
| SOX9 KO | 302 | 3000 | 1695 | 1.77 | sym  |
| SOX9 KO | 303 | 3144 | 603  | 5.21 | asym |
| SOX9 KO | 304 | 2219 | 1734 | 1.28 | sym  |
| SOX9 KO | 305 | 3206 | 1762 | 1.82 | sym  |
| SOX9 KO | 306 | 2584 | 1420 | 1.82 | sym  |
| SOX9 KO | 307 | 2658 | 1146 | 2.32 | asym |
| SOX9 KO | 308 | 3185 | 900  | 3.54 | asym |
| SOX9 KO | 309 | 2386 | 757  | 3.15 | asym |
| SOX9 KO | 310 | 2088 | 782  | 2.67 | asym |
| SOX9 KO | 311 | 2820 | 678  | 4.16 | asym |
| SOX9 KO | 312 | 2250 | 2446 | 0.92 | sym  |
| SOX9 KO | 313 | 2646 | 928  | 2.85 | asym |
| SOX9 KO | 314 | 2931 | 3186 | 0.92 | sym  |
| SOX9 KO | 315 | 2514 | 1822 | 1.38 | sym  |
| SOX9 KO | 316 | 1946 | 591  | 3.29 | asym |
| SOX9 KO | 317 | 3120 | 997  | 3.13 | asym |
| SOX9 KO | 318 | 2581 | 1067 | 2.42 | asym |
| SOX9 KO | 319 | 1865 | 313  | 5.95 | asym |
| SOX9 KO | 320 | 3482 | 4299 | 0.81 | sym  |
| SOX9 KO | 321 | 2760 | 2680 | 1.03 | sym  |
| SOX9 KO | 322 | 3083 | 1803 | 1.71 | sym  |
| SOX9 KO | 323 | 2045 | 1182 | 1.73 | sym  |
| SOX9 KO | 324 | 3250 | 550  | 5.91 | asym |
| SOX9 KO | 325 | 2397 | 1324 | 1.81 | sym  |
| SOX9 KO | 326 | 2953 | 3558 | 0.83 | sym  |
| SOX9 KO | 327 | 2467 | 2741 | 0.9  | sym  |
| SOX9 KO | 328 | 2360 | 499  | 4.73 | asym |
| SOX9 KO | 329 | 2719 | 804  | 3.38 | asym |
| SOX9 KO | 330 | 2823 | 604  | 4.67 | asym |
| SOX9 KO | 331 | 2962 | 1851 | 1.6  | sym  |
| SOX9 KO | 332 | 3425 | 1134 | 3.02 | asym |
| SOX9 KO | 333 | 2627 | 973  | 2.7  | asym |
| SOX9 KO | 334 | 2443 | 456  | 5.36 | asym |
| SOX9 KO | 335 | 2656 | 2887 | 0.92 | sym  |
| SOX9 KO | 336 | 2385 | 587  | 4.06 | asym |
| SOX9 KO | 337 | 2832 | 818  | 3.46 | asym |
| SOX9 KO | 338 | 2530 | 616  | 4.11 | asym |
| SOX9 KO | 339 | 3192 | 551  | 5.79 | asym |
| SOX9 KO | 340 | 2580 | 472  | 5.47 | asym |
| SOX9 KO | 341 | 2499 | 692  | 3.61 | asym |
| SOX9 KO | 342 | 2393 | 716  | 3.34 | asym |
| SOX9 KO | 343 | 2411 | 419  | 5.75 | asym |
| SOX9 KO | 344 | 1861 | 513  | 3.63 | asym |
| SOX9 KO | 345 | 2874 | 2933 | 0.98 | sym  |
| SOX9 KO | 346 | 1848 | 703  | 2.63 | asym |
| SOX9 KO | 347 | 3376 | 1542 | 2.19 | asym |
| SOX9 KO | 348 | 2078 | 1453 | 1.43 | sym  |
| SOX9 KO | 349 | 3495 | 1392 | 2.51 | asym |
| SOX9 KO | 350 | 3294 | 629  | 5.24 | asym |
| SOX9 KO | 351 | 2832 | 617  | 4.59 | asym |

|         |     |      |      |      |      |
|---------|-----|------|------|------|------|
| SOX9 KO | 353 | 3254 | 625  | 5.21 | asym |
| SOX9 KO | 354 | 3388 | 1122 | 3.02 | asym |
| SOX9 KO | 355 | 2676 | 1037 | 2.58 | asym |
| SOX9 KO | 356 | 3116 | 3085 | 1.01 | sym  |
| SOX9 KO | 357 | 2121 | 1657 | 1.28 | sym  |
| SOX9 KO | 358 | 2331 | 416  | 5.6  | asym |
| SOX9 KO | 359 | 3044 | 2057 | 1.48 | sym  |
| SOX9 KO | 360 | 2848 | 2094 | 1.36 | sym  |
| SOX9 KO | 361 | 2972 | 1304 | 2.28 | asym |
| SOX9 KO | 362 | 2271 | 1018 | 2.23 | asym |
| SOX9 KO | 363 | 2831 | 1838 | 1.54 | sym  |
| SOX9 KO | 364 | 2933 | 937  | 3.13 | asym |
| SOX9 KO | 365 | 3112 | 2394 | 1.3  | sym  |
| SOX9 KO | 366 | 3103 | 593  | 5.23 | asym |
| SOX9 KO | 367 | 1956 | 374  | 5.23 | asym |
| SOX9 KO | 368 | 3319 | 899  | 3.69 | asym |
| SOX9 KO | 369 | 2135 | 450  | 4.74 | asym |
| SOX9 KO | 370 | 3006 | 1405 | 2.14 | asym |
| SOX9 KO | 371 | 3174 | 1463 | 2.17 | asym |
| SOX9 KO | 372 | 3177 | 596  | 5.33 | asym |
| SOX9 KO | 373 | 3095 | 2496 | 1.24 | sym  |
| SOX9 KO | 374 | 2614 | 1665 | 1.57 | sym  |
| SOX9 KO | 375 | 2021 | 548  | 3.69 | asym |
| SOX9 KO | 376 | 2296 | 2417 | 0.95 | sym  |
| SOX9 KO | 377 | 2017 | 516  | 3.91 | asym |
| SOX9 KO | 378 | 1840 | 462  | 3.98 | asym |
| SOX9 KO | 379 | 2939 | 2070 | 1.42 | sym  |
| SOX9 KO | 380 | 1865 | 1793 | 1.04 | sym  |
| SOX9 KO | 381 | 3407 | 1163 | 2.93 | asym |
| SOX9 KO | 382 | 3283 | 767  | 4.28 | asym |
| SOX9 KO | 383 | 2935 | 578  | 5.08 | asym |
| SOX9 KO | 384 | 3084 | 921  | 3.35 | asym |
| SOX9 KO | 385 | 2492 | 1051 | 2.37 | asym |
| SOX9 KO | 386 | 3264 | 1070 | 3.05 | asym |
| SOX9 KO | 387 | 2953 | 779  | 3.79 | asym |
| SOX9 KO | 388 | 2127 | 837  | 2.54 | asym |
| SOX9 KO | 389 | 3177 | 1381 | 2.3  | asym |
| SOX9 KO | 390 | 2596 | 2128 | 1.22 | sym  |
| SOX9 KO | 391 | 2466 | 1409 | 1.75 | sym  |
| SOX9 KO | 392 | 2559 | 666  | 3.84 | asym |
| SOX9 KO | 393 | 2557 | 649  | 3.94 | asym |
| SOX9 KO | 394 | 3444 | 2629 | 1.31 | sym  |
| SOX9 KO | 395 | 2372 | 704  | 3.37 | asym |
| SOX9 KO | 396 | 2090 | 425  | 4.92 | asym |
| SOX9 KO | 397 | 1968 | 781  | 2.52 | asym |
| SOX9 KO | 398 | 3310 | 1235 | 2.68 | asym |
| SOX9 KO | 399 | 2739 | 592  | 4.63 | asym |
| SOX9 KO | 400 | 2928 | 635  | 4.61 | asym |



| Group   | Pair cell No. | BrdU intensive value |           | Relative value | Pair cell type | SOX9 intensive value |             | Relative value |
|---------|---------------|----------------------|-----------|----------------|----------------|----------------------|-------------|----------------|
|         |               | First cell           | Second ce |                |                | First cell           | Second cell |                |
| Control | 1             | 2353                 | 1612      | 1.46           | Sym            | 2719                 | 2324        | 1.17           |
| Control | 2             | 2401                 | 2001      | 1.2            | Sym            | 2640                 | 2336        | 1.13           |
| Control | 3             | 3044                 | 2647      | 1.15           | Sym            | 2201                 | 2246        | 0.98           |
| Control | 4             | 2927                 | 2957      | 0.99           | Sym            | 2867                 | 2515        | 1.14           |
| Control | 5             | 2431                 | 1491      | 1.63           | Sym            | 3094                 | 2022        | 1.53           |
| Control | 6             | 3367                 | 1772      | 1.9            | Sym            | 2691                 | 2170        | 1.24           |
| Control | 7             | 1812                 | 1294      | 1.4            | Sym            | 2806                 | 2528        | 1.11           |
| Control | 8             | 1838                 | 715       | 2.57           | Asym           | 3142                 | 752         | 4.18           |
| Control | 9             | 2680                 | 2945      | 0.91           | Sym            | 2597                 | 1982        | 1.31           |
| Control | 10            | 2566                 | 1677      | 1.53           | Sym            | 2536                 | 1679        | 1.51           |
| Control | 11            | 3198                 | 1738      | 1.84           | Sym            | 2406                 | 2934        | 0.82           |
| Control | 12            | 2970                 | 3713      | 0.8            | Sym            | 2844                 | 2046        | 1.39           |
| Control | 13            | 3242                 | 2679      | 1.21           | Sym            | 2653                 | 2434        | 1.09           |
| Control | 14            | 3390                 | 2371      | 1.43           | Sym            | 3376                 | 1845        | 1.83           |
| Control | 15            | 1981                 | 1193      | 1.66           | Sym            | 3444                 | 4305        | 0.8            |
| Control | 16            | 2726                 | 1482      | 1.84           | Sym            | 2810                 | 2958        | 0.95           |
| Control | 17            | 2435                 | 1571      | 1.55           | Sym            | 2787                 | 1991        | 1.4            |
| Control | 18            | 2369                 | 1316      | 1.8            | Sym            | 2863                 | 1564        | 1.83           |
| Control | 19            | 2731                 | 2375      | 1.15           | Sym            | 2249                 | 1190        | 1.89           |
| Control | 20            | 3315                 | 1873      | 1.77           | Sym            | 2244                 | 1753        | 1.28           |
| Control | 21            | 2076                 | 2163      | 0.96           | Sym            | 2145                 | 1262        | 1.7            |
| Control | 22            | 2051                 | 1455      | 1.41           | Sym            | 2283                 | 1297        | 1.76           |
| Control | 23            | 3095                 | 2537      | 1.22           | Sym            | 3135                 | 1912        | 1.64           |
| Control | 24            | 2831                 | 1792      | 1.58           | Sym            | 3101                 | 2542        | 1.22           |
| Control | 25            | 2214                 | 1785      | 1.24           | Sym            | 3491                 | 2182        | 1.6            |
| Control | 26            | 3237                 | 1927      | 1.68           | Sym            | 1875                 | 1689        | 1.11           |
| Control | 27            | 3236                 | 3596      | 0.9            | Sym            | 2362                 | 2339        | 1.01           |
| Control | 28            | 3030                 | 1906      | 1.59           | Sym            | 3373                 | 2499        | 1.35           |
| Control | 29            | 3475                 | 905       | 3.84           | Asym           | 2754                 | 615         | 4.48           |
| Control | 30            | 2744                 | 1499      | 1.83           | Sym            | 2772                 | 1860        | 1.49           |
| Control | 31            | 1838                 | 2020      | 0.91           | Sym            | 2920                 | 2835        | 1.03           |
| Control | 32            | 3112                 | 2964      | 1.05           | Sym            | 2371                 | 2549        | 0.93           |
| Control | 33            | 3358                 | 2224      | 1.51           | Sym            | 1840                 | 1373        | 1.34           |
| Control | 34            | 2343                 | 2169      | 1.08           | Sym            | 3324                 | 2557        | 1.3            |
| Control | 35            | 2087                 | 1569      | 1.33           | Sym            | 2598                 | 2986        | 0.87           |
| Control | 36            | 3127                 | 558       | 5.6            | Asym           | 2324                 | 551         | 4.22           |
| Control | 37            | 2975                 | 2220      | 1.34           | Sym            | 2810                 | 1735        | 1.62           |
| Control | 38            | 2157                 | 1299      | 1.66           | Sym            | 3351                 | 2311        | 1.45           |
| Control | 39            | 2987                 | 2531      | 1.18           | Sym            | 1902                 | 1132        | 1.68           |
| Control | 40            | 2377                 | 1415      | 1.68           | Sym            | 2179                 | 1305        | 1.67           |
| Control | 41            | 3266                 | 2384      | 1.37           | Sym            | 2185                 | 2121        | 1.03           |
| Control | 42            | 2987                 | 2371      | 1.26           | Sym            | 2107                 | 1453        | 1.45           |
| Control | 43            | 2480                 | 835       | 2.97           | Asym           | 2375                 | 910         | 2.61           |
| Control | 44            | 2796                 | 1955      | 1.43           | Sym            | 2302                 | 1525        | 1.51           |
| Control | 45            | 2000                 | 1087      | 1.84           | Sym            | 2929                 | 2306        | 1.27           |
| Control | 46            | 2782                 | 2484      | 1.12           | Sym            | 2199                 | 1222        | 1.8            |
| Control | 47            | 3486                 | 1606      | 2.17           | Asym           | 3261                 | 553         | 5.9            |
| Control | 48            | 2960                 | 3654      | 0.81           | Sym            | 3193                 | 2514        | 1.27           |
| Control | 49            | 2633                 | 1936      | 1.36           | Sym            | 3024                 | 1800        | 1.68           |
| Control | 50            | 3210                 | 3087      | 1.04           | Sym            | 2884                 | 1696        | 1.7            |
| Control | 51            | 1943                 | 1092      | 1.78           | Sym            | 3269                 | 3892        | 0.84           |
| Control | 52            | 2919                 | 2178      | 1.34           | Sym            | 3297                 | 2867        | 1.15           |
| Control | 53            | 2827                 | 3365      | 0.84           | Sym            | 2212                 | 1475        | 1.5            |
| Control | 54            | 2086                 | 1783      | 1.17           | Sym            | 3272                 | 1818        | 1.8            |
| Control | 55            | 2814                 | 2513      | 1.12           | Sym            | 2010                 | 1129        | 1.78           |
| Control | 56            | 1998                 | 1537      | 1.3            | Sym            | 2230                 | 1604        | 1.39           |
| Control | 57            | 2585                 | 1225      | 2.11           | Asym           | 3015                 | 779         | 3.87           |
| Control | 58            | 2071                 | 1113      | 1.86           | Sym            | 2288                 | 1476        | 1.55           |
| Control | 59            | 2020                 | 2149      | 0.94           | Sym            | 2841                 | 3423        | 0.83           |
| Control | 60            | 3168                 | 2296      | 1.38           | Sym            | 3472                 | 2846        | 1.22           |
| Control | 61            | 2334                 | 2141      | 1.09           | Sym            | 3227                 | 2582        | 1.25           |

|         |     |      |      |      |      |      |      |      |
|---------|-----|------|------|------|------|------|------|------|
| Control | 63  | 3288 | 1858 | 1.77 | Sym  | 2075 | 1621 | 1.28 |
| Control | 64  | 3314 | 1973 | 1.68 | Sym  | 2786 | 2211 | 1.26 |
| Control | 65  | 2810 | 2782 | 1.01 | Sym  | 2193 | 1443 | 1.52 |
| Control | 66  | 3480 | 3446 | 1.01 | Sym  | 2506 | 2914 | 0.86 |
| Control | 67  | 2115 | 1365 | 1.55 | Sym  | 3345 | 3279 | 1.02 |
| Control | 68  | 1971 | 1101 | 1.79 | Sym  | 3262 | 2399 | 1.36 |
| Control | 69  | 2099 | 2120 | 0.99 | Sym  | 2382 | 1778 | 1.34 |
| Control | 70  | 3180 | 3495 | 0.91 | Sym  | 3302 | 2428 | 1.36 |
| Control | 71  | 2746 | 1560 | 1.76 | Sym  | 2513 | 1351 | 1.86 |
| Control | 72  | 2536 | 1335 | 1.9  | Sym  | 3262 | 1763 | 1.85 |
| Control | 73  | 2008 | 2308 | 0.87 | Sym  | 2077 | 1423 | 1.46 |
| Control | 74  | 3283 | 2379 | 1.38 | Sym  | 2875 | 1691 | 1.7  |
| Control | 75  | 2211 | 2513 | 0.88 | Sym  | 2741 | 2061 | 1.33 |
| Control | 76  | 1909 | 1171 | 1.63 | Sym  | 3341 | 2856 | 1.17 |
| Control | 77  | 3413 | 1886 | 1.81 | Sym  | 2065 | 1167 | 1.77 |
| Control | 78  | 3138 | 3692 | 0.85 | Sym  | 3359 | 2999 | 1.12 |
| Control | 79  | 2280 | 1253 | 1.82 | Sym  | 3443 | 2918 | 1.18 |
| Control | 80  | 2430 | 2189 | 1.11 | Sym  | 1919 | 1060 | 1.81 |
| Control | 81  | 2849 | 2175 | 1.31 | Sym  | 2625 | 3241 | 0.81 |
| Control | 82  | 2680 | 2291 | 1.17 | Sym  | 3033 | 1872 | 1.62 |
| Control | 83  | 2779 | 2550 | 1.09 | Sym  | 3436 | 2322 | 1.48 |
| Control | 84  | 3409 | 1833 | 1.86 | Sym  | 2288 | 1278 | 1.79 |
| Control | 85  | 3408 | 1623 | 2.1  | Asym | 3406 | 860  | 3.96 |
| Control | 86  | 2415 | 2464 | 0.98 | Sym  | 2101 | 2040 | 1.03 |
| Control | 87  | 1910 | 1201 | 1.59 | Sym  | 2224 | 1417 | 1.57 |
| Control | 88  | 2614 | 1828 | 1.43 | Sym  | 3359 | 3691 | 0.91 |
| Control | 89  | 2252 | 1958 | 1.15 | Sym  | 2770 | 1699 | 1.63 |
| Control | 90  | 2526 | 1844 | 1.37 | Sym  | 2142 | 1170 | 1.83 |
| Control | 91  | 2685 | 2050 | 1.31 | Sym  | 3115 | 2148 | 1.45 |
| Control | 92  | 2678 | 1695 | 1.58 | Sym  | 2869 | 1668 | 1.72 |
| Control | 93  | 3009 | 575  | 5.23 | Asym | 2735 | 800  | 3.42 |
| Control | 94  | 1842 | 2093 | 0.88 | Sym  | 2451 | 2380 | 1.03 |
| Control | 95  | 2278 | 1381 | 1.65 | Sym  | 2741 | 2538 | 1.08 |
| Control | 96  | 2722 | 1479 | 1.84 | Sym  | 2919 | 2146 | 1.36 |
| Control | 97  | 1937 | 1729 | 1.12 | Sym  | 2576 | 1684 | 1.53 |
| Control | 98  | 2356 | 1530 | 1.54 | Sym  | 3032 | 2506 | 1.21 |
| Control | 99  | 2778 | 3347 | 0.83 | Sym  | 2805 | 1508 | 1.86 |
| Control | 100 | 2160 | 1543 | 1.4  | Sym  | 2742 | 3264 | 0.84 |
| Control | 101 | 1847 | 1240 | 1.49 | Sym  | 2088 | 1755 | 1.19 |
| Control | 102 | 2453 | 1348 | 1.82 | Sym  | 2211 | 1755 | 1.26 |
| Control | 103 | 3095 | 2920 | 1.06 | Sym  | 3435 | 2290 | 1.5  |
| Control | 104 | 2487 | 1625 | 1.53 | Sym  | 1981 | 1753 | 1.13 |
| Control | 105 | 2024 | 1425 | 1.42 | Sym  | 3479 | 3550 | 0.98 |
| Control | 106 | 2380 | 2288 | 1.04 | Sym  | 3399 | 2428 | 1.4  |
| Control | 107 | 2830 | 1675 | 1.69 | Sym  | 2582 | 2002 | 1.29 |
| Control | 108 | 2478 | 2555 | 0.97 | Sym  | 2508 | 2200 | 1.14 |
| Control | 109 | 1990 | 1496 | 1.33 | Sym  | 2887 | 2468 | 1.17 |
| Control | 110 | 2286 | 1772 | 1.29 | Sym  | 3403 | 2521 | 1.35 |
| Control | 111 | 2307 | 1398 | 1.65 | Sym  | 3186 | 3705 | 0.86 |
| Control | 112 | 1890 | 384  | 4.92 | Asym | 2228 | 860  | 2.59 |
| Control | 113 | 2569 | 1538 | 1.67 | Sym  | 3483 | 3255 | 1.07 |
| Control | 114 | 2418 | 3023 | 0.8  | Sym  | 2670 | 2495 | 1.07 |
| Control | 115 | 2983 | 522  | 5.72 | Asym | 1887 | 773  | 2.44 |
| Control | 116 | 2526 | 2255 | 1.12 | Sym  | 2611 | 2440 | 1.07 |
| Control | 117 | 3296 | 2424 | 1.36 | Sym  | 2072 | 1248 | 1.66 |
| Control | 118 | 3018 | 1786 | 1.69 | Sym  | 3163 | 2396 | 1.32 |
| Control | 119 | 2859 | 1906 | 1.5  | Sym  | 2907 | 1690 | 1.72 |
| Control | 120 | 2964 | 2334 | 1.27 | Sym  | 3269 | 2123 | 1.54 |
| Control | 121 | 3280 | 1072 | 3.06 | Asym | 1930 | 835  | 2.31 |
| Control | 122 | 3127 | 2044 | 1.53 | Sym  | 2355 | 2264 | 1.04 |
| Control | 123 | 2553 | 1737 | 1.47 | Sym  | 2704 | 1779 | 1.52 |
| Control | 124 | 3491 | 2530 | 1.38 | Sym  | 2141 | 1508 | 1.42 |
| Control | 125 | 3311 | 2207 | 1.5  | Sym  | 2853 | 2692 | 1.06 |

|         |     |      |      |      |      |      |      |      |
|---------|-----|------|------|------|------|------|------|------|
| Control | 127 | 2999 | 2026 | 1.48 | Sym  | 1860 | 1301 | 1.43 |
| Control | 128 | 2075 | 1206 | 1.72 | Sym  | 1883 | 1029 | 1.83 |
| Control | 129 | 3074 | 3074 | 1    | Sym  | 2844 | 2031 | 1.4  |
| Control | 130 | 2914 | 3598 | 0.81 | Sym  | 2717 | 2245 | 1.21 |
| Control | 131 | 2491 | 1730 | 1.44 | Sym  | 2768 | 1797 | 1.54 |
| Control | 132 | 2972 | 1718 | 1.73 | Sym  | 2635 | 1432 | 1.84 |
| Control | 133 | 2530 | 1524 | 1.66 | Sym  | 2814 | 1914 | 1.47 |
| Control | 134 | 2269 | 1036 | 2.19 | Asym | 2237 | 407  | 5.49 |
| Control | 135 | 3240 | 2893 | 1.12 | Sym  | 3304 | 2104 | 1.57 |
| Control | 136 | 2639 | 1660 | 1.59 | Sym  | 1876 | 1226 | 1.53 |
| Control | 137 | 2436 | 3045 | 0.8  | Sym  | 2870 | 1840 | 1.56 |
| Control | 138 | 2470 | 2352 | 1.05 | Sym  | 2951 | 1844 | 1.6  |
| Control | 139 | 2978 | 1731 | 1.72 | Sym  | 1936 | 2225 | 0.87 |
| Control | 140 | 2295 | 1897 | 1.21 | Sym  | 3019 | 2270 | 1.33 |
| Control | 141 | 2066 | 458  | 4.51 | Asym | 2167 | 496  | 4.37 |
| Control | 142 | 2937 | 2128 | 1.38 | Sym  | 2998 | 1675 | 1.79 |
| Control | 143 | 2952 | 2079 | 1.42 | Sym  | 2392 | 1945 | 1.23 |
| Control | 144 | 1863 | 1122 | 1.66 | Sym  | 2786 | 2322 | 1.2  |
| Control | 145 | 2254 | 1288 | 1.75 | Sym  | 3067 | 1893 | 1.62 |
| Control | 146 | 2919 | 3355 | 0.87 | Sym  | 2015 | 1334 | 1.51 |
| Control | 147 | 2093 | 1661 | 1.26 | Sym  | 3334 | 1783 | 1.87 |
| Control | 148 | 1865 | 499  | 3.74 | Asym | 2607 | 605  | 4.31 |
| Control | 149 | 2104 | 664  | 3.17 | Asym | 1821 | 788  | 2.31 |
| Control | 150 | 2341 | 1245 | 1.88 | Sym  | 2999 | 2479 | 1.21 |
| Control | 151 | 2081 | 1239 | 1.68 | Sym  | 3392 | 2950 | 1.15 |
| Control | 152 | 2096 | 1497 | 1.4  | Sym  | 2935 | 2575 | 1.14 |
| Control | 153 | 2172 | 1448 | 1.5  | Sym  | 1864 | 1381 | 1.35 |
| Control | 154 | 2774 | 1541 | 1.8  | Sym  | 2093 | 1464 | 1.43 |
| Control | 155 | 3018 | 2902 | 1.04 | Sym  | 2165 | 2102 | 1.03 |
| Control | 156 | 2797 | 547  | 5.11 | Asym | 2077 | 366  | 5.67 |
| Control | 157 | 2145 | 1459 | 1.47 | Sym  | 2988 | 2197 | 1.36 |
| Control | 158 | 3167 | 2661 | 1.19 | Sym  | 3196 | 2103 | 1.52 |
| Control | 159 | 2595 | 2852 | 0.91 | Sym  | 2269 | 1343 | 1.69 |
| Control | 160 | 3114 | 3210 | 0.97 | Sym  | 2374 | 1785 | 1.33 |
| Control | 161 | 2301 | 385  | 5.97 | Asym | 2224 | 478  | 4.65 |
| Control | 162 | 3463 | 2025 | 1.71 | Sym  | 2145 | 1625 | 1.32 |
| Control | 163 | 2701 | 2728 | 0.99 | Sym  | 1840 | 1533 | 1.2  |
| Control | 164 | 1947 | 2140 | 0.91 | Sym  | 2875 | 2162 | 1.33 |
| Control | 165 | 1892 | 1205 | 1.57 | Sym  | 3438 | 1868 | 1.84 |
| Control | 166 | 2528 | 520  | 4.86 | Asym | 2307 | 1012 | 2.28 |
| Control | 167 | 1888 | 1187 | 1.59 | Sym  | 2221 | 2243 | 0.99 |
| Control | 168 | 3392 | 593  | 5.72 | Asym | 3463 | 726  | 4.77 |
| Control | 169 | 2017 | 1868 | 1.08 | Sym  | 3277 | 4096 | 0.8  |
| Control | 170 | 3224 | 1990 | 1.62 | Sym  | 3396 | 2479 | 1.37 |
| Control | 171 | 2144 | 1499 | 1.43 | Sym  | 3073 | 1617 | 1.9  |
| Control | 172 | 2532 | 2845 | 0.89 | Sym  | 3053 | 2063 | 1.48 |
| Control | 173 | 2591 | 1851 | 1.4  | Sym  | 3357 | 3730 | 0.9  |
| Control | 174 | 2612 | 2353 | 1.11 | Sym  | 3343 | 2857 | 1.17 |
| Control | 175 | 2454 | 3068 | 0.8  | Sym  | 3276 | 1733 | 1.89 |
| Control | 176 | 2894 | 1654 | 1.75 | Sym  | 3047 | 2673 | 1.14 |
| Control | 177 | 2252 | 2066 | 1.09 | Sym  | 3350 | 3350 | 1    |
| Control | 178 | 3305 | 3592 | 0.92 | Sym  | 2978 | 1959 | 1.52 |
| Control | 179 | 1814 | 1148 | 1.58 | Sym  | 2017 | 1293 | 1.56 |
| Control | 180 | 2272 | 2443 | 0.93 | Sym  | 3303 | 3670 | 0.9  |
| Control | 181 | 2448 | 1375 | 1.78 | Sym  | 2619 | 1912 | 1.37 |
| Control | 182 | 2555 | 1558 | 1.64 | Sym  | 3125 | 2003 | 1.56 |
| Control | 183 | 2069 | 1989 | 1.04 | Sym  | 3096 | 3870 | 0.8  |
| Control | 184 | 3045 | 1603 | 1.9  | Sym  | 2640 | 3220 | 0.82 |
| Control | 185 | 3307 | 669  | 4.94 | Asym | 2140 | 375  | 5.7  |
| Control | 186 | 2177 | 1146 | 1.9  | Sym  | 2655 | 2918 | 0.91 |
| Control | 187 | 2018 | 1140 | 1.77 | Sym  | 2707 | 1829 | 1.48 |
| Control | 188 | 3120 | 3152 | 0.99 | Sym  | 2730 | 1706 | 1.6  |
| Control | 189 | 3286 | 3190 | 1.03 | Sym  | 2792 | 2609 | 1.07 |

|         |     |      |      |      |      |      |      |      |
|---------|-----|------|------|------|------|------|------|------|
| Control | 191 | 3181 | 2790 | 1.14 | Sym  | 2201 | 2269 | 0.97 |
| Control | 192 | 2180 | 1703 | 1.28 | Sym  | 2342 | 1473 | 1.59 |
| Control | 193 | 2892 | 1643 | 1.76 | Sym  | 3344 | 2171 | 1.54 |
| Control | 194 | 3276 | 2100 | 1.56 | Sym  | 2518 | 1368 | 1.84 |
| Control | 195 | 2909 | 2020 | 1.44 | Sym  | 2546 | 1819 | 1.4  |
| Control | 196 | 2360 | 1439 | 1.64 | Sym  | 1831 | 1606 | 1.14 |
| Control | 197 | 1859 | 2187 | 0.85 | Sym  | 1987 | 1565 | 1.27 |
| Control | 198 | 1895 | 1620 | 1.17 | Sym  | 2239 | 1736 | 1.29 |
| Control | 199 | 2140 | 1621 | 1.32 | Sym  | 3491 | 3232 | 1.08 |
| Control | 200 | 2668 | 1827 | 1.46 | Sym  | 3038 | 2250 | 1.35 |
| Control | 201 | 2190 | 1281 | 1.71 | Sym  | 2497 | 1734 | 1.44 |
| Control | 202 | 2520 | 1615 | 1.56 | Sym  | 2676 | 2212 | 1.21 |
| Control | 203 | 2200 | 1507 | 1.46 | Sym  | 3091 | 2944 | 1.05 |
| Control | 204 | 3397 | 2376 | 1.43 | Sym  | 2641 | 2001 | 1.32 |
| Control | 205 | 2938 | 2084 | 1.41 | Sym  | 2035 | 1204 | 1.69 |
| Control | 206 | 3022 | 2798 | 1.08 | Sym  | 2285 | 1904 | 1.2  |
| Control | 207 | 2896 | 2335 | 1.24 | Sym  | 3324 | 3324 | 1    |
| Control | 208 | 2870 | 1527 | 1.88 | Sym  | 2738 | 1521 | 1.8  |
| Control | 209 | 2997 | 2540 | 1.18 | Sym  | 2975 | 2917 | 1.02 |
| Control | 210 | 2632 | 1841 | 1.43 | Sym  | 3043 | 2158 | 1.41 |
| Control | 211 | 1854 | 1030 | 1.8  | Sym  | 3353 | 2163 | 1.55 |
| Control | 212 | 2400 | 2143 | 1.12 | Sym  | 2442 | 1565 | 1.56 |
| Control | 213 | 2504 | 1941 | 1.29 | Sym  | 3232 | 1983 | 1.63 |
| Control | 214 | 3071 | 2209 | 1.39 | Sym  | 3002 | 2972 | 1.01 |
| Control | 215 | 1949 | 1949 | 1    | Sym  | 2473 | 2027 | 1.22 |
| Control | 216 | 1835 | 1359 | 1.35 | Sym  | 3063 | 1951 | 1.57 |
| Control | 217 | 2752 | 952  | 2.89 | Asym | 3254 | 551  | 5.91 |
| Control | 218 | 2920 | 1872 | 1.56 | Sym  | 3005 | 2782 | 1.08 |
| Control | 219 | 3449 | 2269 | 1.52 | Sym  | 2255 | 1401 | 1.61 |
| Control | 220 | 1993 | 1208 | 1.65 | Sym  | 2762 | 1959 | 1.41 |
| Control | 221 | 1861 | 1739 | 1.07 | Sym  | 2141 | 1755 | 1.22 |
| Control | 222 | 3161 | 1904 | 1.66 | Sym  | 3322 | 3134 | 1.06 |
| Control | 223 | 2408 | 1824 | 1.32 | Sym  | 3206 | 3375 | 0.95 |
| Control | 224 | 2591 | 1751 | 1.48 | Sym  | 1895 | 1280 | 1.48 |
| Control | 225 | 2875 | 1742 | 1.65 | Sym  | 2799 | 2221 | 1.26 |
| Control | 226 | 2195 | 1199 | 1.83 | Sym  | 2977 | 1627 | 1.83 |
| Control | 227 | 2328 | 1361 | 1.71 | Sym  | 1952 | 1284 | 1.52 |
| Control | 228 | 3244 | 2749 | 1.18 | Sym  | 2961 | 2260 | 1.31 |
| Control | 229 | 2912 | 513  | 5.68 | Asym | 1876 | 356  | 5.27 |
| Control | 230 | 2134 | 1569 | 1.36 | Sym  | 2693 | 1593 | 1.69 |
| Control | 231 | 3107 | 2285 | 1.36 | Sym  | 2773 | 2641 | 1.05 |
| Control | 232 | 3163 | 1748 | 1.81 | Sym  | 2346 | 2256 | 1.04 |
| Control | 233 | 2349 | 2526 | 0.93 | Sym  | 3163 | 2614 | 1.21 |
| Control | 234 | 2359 | 1887 | 1.25 | Sym  | 1894 | 1076 | 1.76 |
| Control | 235 | 3283 | 2468 | 1.33 | Sym  | 1818 | 1337 | 1.36 |
| Control | 236 | 3203 | 2373 | 1.35 | Sym  | 3146 | 3115 | 1.01 |
| Control | 237 | 2281 | 1825 | 1.25 | Sym  | 2292 | 1559 | 1.47 |
| Control | 238 | 3418 | 2249 | 1.52 | Sym  | 3138 | 1763 | 1.78 |
| Control | 239 | 1892 | 1514 | 1.25 | Sym  | 2324 | 1277 | 1.82 |
| Control | 240 | 1871 | 2227 | 0.84 | Sym  | 3420 | 3931 | 0.87 |
| Control | 241 | 2497 | 1906 | 1.31 | Sym  | 1988 | 1657 | 1.2  |
| Control | 242 | 3271 | 2681 | 1.22 | Sym  | 3034 | 2685 | 1.13 |
| Control | 243 | 2020 | 1788 | 1.13 | Sym  | 1849 | 1350 | 1.37 |
| Control | 244 | 2135 | 1334 | 1.6  | Sym  | 2346 | 1268 | 1.85 |
| Control | 245 | 3099 | 1999 | 1.55 | Sym  | 2739 | 2107 | 1.3  |
| Control | 246 | 2384 | 439  | 5.43 | Asym | 3032 | 1184 | 2.56 |
| Control | 247 | 3056 | 2108 | 1.45 | Sym  | 3087 | 2270 | 1.36 |
| Control | 248 | 3192 | 2086 | 1.53 | Sym  | 2009 | 2208 | 0.91 |
| Control | 249 | 2018 | 851  | 2.37 | Asym | 3486 | 771  | 4.52 |
| Control | 250 | 2114 | 744  | 2.84 | Asym | 2574 | 562  | 4.58 |
| Control | 251 | 2781 | 2156 | 1.29 | Sym  | 2792 | 1745 | 1.6  |
| Control | 252 | 1928 | 1872 | 1.03 | Sym  | 2126 | 1915 | 1.11 |
| Control | 253 | 2254 | 1273 | 1.77 | Sym  | 2897 | 1628 | 1.78 |

|         |     |      |      |      |      |      |      |      |
|---------|-----|------|------|------|------|------|------|------|
| Control | 255 | 3174 | 3377 | 0.94 | Sym  | 3379 | 2938 | 1.15 |
| Control | 256 | 2539 | 2673 | 0.95 | Sym  | 2696 | 1912 | 1.41 |
| Control | 257 | 3330 | 2313 | 1.44 | Sym  | 3054 | 3054 | 1    |
| Control | 258 | 1856 | 1751 | 1.06 | Sym  | 2553 | 1713 | 1.49 |
| Control | 259 | 3365 | 2116 | 1.59 | Sym  | 1880 | 2161 | 0.87 |
| Control | 260 | 2954 | 2272 | 1.3  | Sym  | 3139 | 2012 | 1.56 |
| Control | 261 | 2856 | 1623 | 1.76 | Sym  | 2375 | 1270 | 1.87 |
| Control | 262 | 3346 | 1980 | 1.69 | Sym  | 1950 | 2143 | 0.91 |
| Control | 263 | 2082 | 1614 | 1.29 | Sym  | 1933 | 1757 | 1.1  |
| Control | 264 | 2240 | 1238 | 1.81 | Sym  | 3130 | 1692 | 1.85 |
| Control | 265 | 3213 | 2843 | 1.13 | Sym  | 2945 | 1645 | 1.79 |
| Control | 266 | 3085 | 2779 | 1.11 | Sym  | 2361 | 1723 | 1.37 |
| Control | 267 | 2319 | 1784 | 1.3  | Sym  | 2988 | 2958 | 1.01 |
| Control | 268 | 2628 | 2037 | 1.29 | Sym  | 2843 | 1846 | 1.54 |
| Control | 269 | 2404 | 1531 | 1.57 | Sym  | 3114 | 2273 | 1.37 |
| Control | 270 | 2407 | 1308 | 1.84 | Sym  | 2204 | 1763 | 1.25 |
| Control | 271 | 2068 | 1209 | 1.71 | Sym  | 2731 | 1707 | 1.6  |
| Control | 272 | 2397 | 2888 | 0.83 | Sym  | 1891 | 1444 | 1.31 |
| Control | 273 | 3125 | 3511 | 0.89 | Sym  | 2896 | 2563 | 1.13 |
| Control | 274 | 3231 | 3801 | 0.85 | Sym  | 3047 | 2380 | 1.28 |
| Control | 275 | 2780 | 657  | 4.23 | Asym | 2650 | 1008 | 2.63 |
| Control | 276 | 2027 | 678  | 2.99 | Asym | 3263 | 688  | 4.74 |
| Control | 277 | 2161 | 1863 | 1.16 | Sym  | 3251 | 1786 | 1.82 |
| Control | 278 | 2763 | 2228 | 1.24 | Sym  | 3242 | 1762 | 1.84 |
| Control | 279 | 2507 | 3020 | 0.83 | Sym  | 2140 | 1132 | 1.89 |
| Control | 280 | 2678 | 2029 | 1.32 | Sym  | 3495 | 2774 | 1.26 |
| Control | 281 | 1898 | 1026 | 1.85 | Sym  | 3458 | 2096 | 1.65 |
| Control | 282 | 1810 | 1828 | 0.99 | Sym  | 1856 | 1933 | 0.96 |
| Control | 283 | 2395 | 2521 | 0.95 | Sym  | 3212 | 2471 | 1.3  |
| Control | 284 | 2395 | 399  | 6    | Asym | 2469 | 741  | 3.33 |
| Control | 285 | 2440 | 1781 | 1.37 | Sym  | 2969 | 3577 | 0.83 |
| Control | 286 | 3012 | 2896 | 1.04 | Sym  | 3416 | 3349 | 1.02 |
| Control | 287 | 2357 | 2773 | 0.85 | Sym  | 1952 | 1337 | 1.46 |
| Control | 288 | 2936 | 2276 | 1.29 | Sym  | 2336 | 1469 | 1.59 |
| Control | 289 | 2247 | 1422 | 1.58 | Sym  | 2210 | 1535 | 1.44 |
| Control | 290 | 2732 | 2788 | 0.98 | Sym  | 2011 | 1093 | 1.84 |
| Control | 291 | 2519 | 1439 | 1.75 | Sym  | 2029 | 1215 | 1.67 |
| Control | 292 | 1924 | 1203 | 1.6  | Sym  | 3274 | 2183 | 1.5  |
| Control | 293 | 2735 | 1563 | 1.75 | Sym  | 3247 | 3454 | 0.94 |
| Control | 294 | 2888 | 1839 | 1.57 | Sym  | 3474 | 3440 | 1.01 |
| Control | 295 | 2321 | 1488 | 1.56 | Sym  | 3294 | 2656 | 1.24 |
| Control | 296 | 3389 | 3389 | 1    | Sym  | 3429 | 3235 | 1.06 |
| Control | 297 | 1837 | 993  | 1.85 | Sym  | 2126 | 2311 | 0.92 |
| Control | 298 | 2062 | 1235 | 1.67 | Sym  | 2781 | 2959 | 0.94 |
| Control | 299 | 2454 | 2697 | 0.91 | Sym  | 2029 | 1514 | 1.34 |
| Control | 300 | 2882 | 2252 | 1.28 | Sym  | 2136 | 1327 | 1.61 |
| Control | 301 | 2012 | 1341 | 1.5  | Sym  | 2623 | 1499 | 1.75 |
| Control | 302 | 3402 | 1989 | 1.71 | Sym  | 3417 | 2390 | 1.43 |
| Control | 303 | 2420 | 1399 | 1.73 | Sym  | 3036 | 2169 | 1.4  |
| Control | 304 | 2087 | 2046 | 1.02 | Sym  | 2474 | 1537 | 1.61 |
| Control | 305 | 3062 | 3093 | 0.99 | Sym  | 2757 | 2105 | 1.31 |
| Control | 306 | 3355 | 3459 | 0.97 | Sym  | 2260 | 2379 | 0.95 |
| Control | 307 | 1877 | 1104 | 1.7  | Sym  | 3467 | 2051 | 1.69 |
| Control | 308 | 1905 | 1121 | 1.7  | Sym  | 3332 | 4165 | 0.8  |
| Control | 309 | 3483 | 3666 | 0.95 | Sym  | 2794 | 3366 | 0.83 |
| Control | 310 | 3302 | 2231 | 1.48 | Sym  | 3295 | 3621 | 0.91 |
| Control | 311 | 3123 | 1940 | 1.61 | Sym  | 3205 | 1723 | 1.86 |
| Control | 312 | 3058 | 2831 | 1.08 | Sym  | 3033 | 2426 | 1.25 |
| Control | 313 | 3007 | 3007 | 1    | Sym  | 2545 | 2828 | 0.9  |
| Control | 314 | 1884 | 2191 | 0.86 | Sym  | 2639 | 1670 | 1.58 |
| Control | 315 | 2131 | 1430 | 1.49 | Sym  | 2483 | 1496 | 1.66 |
| Control | 316 | 1824 | 1322 | 1.38 | Sym  | 2065 | 2197 | 0.94 |
| Control | 317 | 2883 | 2912 | 0.99 | Sym  | 2457 | 2100 | 1.17 |

|         |     |      |      |      |      |      |      |      |
|---------|-----|------|------|------|------|------|------|------|
| Control | 319 | 3058 | 3028 | 1.01 | Sym  | 3134 | 1781 | 1.76 |
| Control | 320 | 3093 | 1921 | 1.61 | Sym  | 2137 | 1174 | 1.82 |
| Control | 321 | 2833 | 1647 | 1.72 | Sym  | 1951 | 1823 | 1.07 |
| Control | 322 | 3012 | 550  | 5.48 | Asym | 2539 | 648  | 3.92 |
| Control | 323 | 2240 | 2113 | 1.06 | Sym  | 1986 | 1482 | 1.34 |
| Control | 324 | 2223 | 1967 | 1.13 | Sym  | 3425 | 2210 | 1.55 |
| Control | 325 | 2354 | 1481 | 1.59 | Sym  | 3487 | 2583 | 1.35 |
| Control | 326 | 3400 | 4000 | 0.85 | Sym  | 3158 | 1891 | 1.67 |
| Control | 327 | 3244 | 2079 | 1.56 | Sym  | 3166 | 2729 | 1.16 |
| Control | 328 | 3385 | 3679 | 0.92 | Sym  | 2752 | 3440 | 0.8  |
| Control | 329 | 2169 | 1339 | 1.62 | Sym  | 2457 | 1694 | 1.45 |
| Control | 330 | 2766 | 2538 | 1.09 | Sym  | 3477 | 2634 | 1.32 |
| Control | 331 | 1843 | 2071 | 0.89 | Sym  | 2749 | 1774 | 1.55 |
| Control | 332 | 2354 | 1757 | 1.34 | Sym  | 1851 | 1115 | 1.66 |
| Control | 333 | 2697 | 2670 | 1.01 | Sym  | 2282 | 1391 | 1.64 |
| Control | 334 | 3243 | 3003 | 1.08 | Sym  | 3141 | 2362 | 1.33 |
| Control | 335 | 2590 | 2515 | 1.03 | Sym  | 1804 | 1289 | 1.4  |
| Control | 336 | 2033 | 1255 | 1.62 | Sym  | 1928 | 1244 | 1.55 |
| Control | 337 | 2288 | 422  | 5.42 | Asym | 3257 | 1441 | 2.26 |
| Control | 338 | 2616 | 1721 | 1.52 | Sym  | 2984 | 2350 | 1.27 |
| Control | 339 | 2389 | 2541 | 0.94 | Sym  | 1875 | 1720 | 1.09 |
| Control | 340 | 3451 | 2655 | 1.3  | Sym  | 2100 | 1228 | 1.71 |
| Control | 341 | 3447 | 1123 | 3.07 | Asym | 2576 | 578  | 4.46 |
| Control | 342 | 3311 | 1780 | 1.86 | Sym  | 2542 | 2118 | 1.2  |
| Control | 343 | 1892 | 1094 | 1.73 | Sym  | 2938 | 2369 | 1.24 |
| Control | 344 | 2862 | 3077 | 0.93 | Sym  | 3278 | 3246 | 1.01 |
| Control | 345 | 3092 | 1777 | 1.74 | Sym  | 3439 | 3620 | 0.95 |
| Control | 346 | 2816 | 2657 | 1.06 | Sym  | 2863 | 1909 | 1.5  |
| Control | 347 | 2399 | 2822 | 0.85 | Sym  | 3340 | 2212 | 1.51 |
| Control | 348 | 2569 | 2854 | 0.9  | Sym  | 2425 | 2021 | 1.2  |
| Control | 349 | 1883 | 738  | 2.55 | Asym | 2483 | 446  | 5.57 |
| Control | 350 | 3450 | 2974 | 1.16 | Sym  | 2559 | 3121 | 0.82 |
| Control | 351 | 2295 | 531  | 4.32 | Asym | 2863 | 748  | 3.83 |
| Control | 352 | 2952 | 1905 | 1.55 | Sym  | 2351 | 1729 | 1.36 |
| Control | 353 | 1829 | 820  | 2.23 | Asym | 1843 | 430  | 4.29 |
| Control | 354 | 2042 | 1428 | 1.43 | Sym  | 2661 | 1603 | 1.66 |
| Control | 355 | 2096 | 1184 | 1.77 | Sym  | 1890 | 995  | 1.9  |
| Control | 356 | 3321 | 1989 | 1.67 | Sym  | 3099 | 2066 | 1.5  |
| Control | 357 | 2002 | 1100 | 1.82 | Sym  | 3447 | 4153 | 0.83 |
| Control | 358 | 3082 | 3113 | 0.99 | Sym  | 2603 | 1505 | 1.73 |
| Control | 359 | 3470 | 1886 | 1.84 | Sym  | 2067 | 2247 | 0.92 |
| Control | 360 | 3232 | 1847 | 1.75 | Sym  | 2481 | 1356 | 1.83 |
| Control | 361 | 3231 | 1912 | 1.69 | Sym  | 2273 | 1709 | 1.33 |
| Control | 362 | 3234 | 2156 | 1.5  | Sym  | 3389 | 2456 | 1.38 |
| Control | 363 | 2552 | 1410 | 1.81 | Sym  | 3186 | 1686 | 1.89 |
| Control | 364 | 2861 | 1616 | 1.77 | Sym  | 1831 | 1221 | 1.5  |
| Control | 365 | 2103 | 1216 | 1.73 | Sym  | 2235 | 2304 | 0.97 |
| Control | 366 | 3134 | 1649 | 1.9  | Sym  | 2331 | 2428 | 0.96 |
| Control | 367 | 2934 | 1736 | 1.69 | Sym  | 2746 | 1855 | 1.48 |
| Control | 368 | 2294 | 2030 | 1.13 | Sym  | 3168 | 2185 | 1.45 |
| Control | 369 | 3470 | 2551 | 1.36 | Sym  | 3293 | 3967 | 0.83 |
| Control | 370 | 2839 | 3120 | 0.91 | Sym  | 2340 | 1490 | 1.57 |
| Control | 371 | 2778 | 1625 | 1.71 | Sym  | 2075 | 1526 | 1.36 |
| Control | 372 | 1834 | 1054 | 1.74 | Sym  | 3069 | 2646 | 1.16 |
| Control | 373 | 3207 | 2258 | 1.42 | Sym  | 1980 | 1112 | 1.78 |
| Control | 374 | 2765 | 1268 | 2.18 | Asym | 3178 | 1471 | 2.16 |
| Control | 375 | 3073 | 1635 | 1.88 | Sym  | 2133 | 2051 | 1.04 |
| Control | 376 | 2351 | 1442 | 1.63 | Sym  | 3159 | 2527 | 1.25 |
| Control | 377 | 2333 | 2011 | 1.16 | Sym  | 3428 | 2721 | 1.26 |
| Control | 378 | 3042 | 869  | 3.5  | Asym | 1957 | 497  | 3.94 |
| Control | 379 | 2239 | 1197 | 1.87 | Sym  | 2140 | 1574 | 1.36 |
| Control | 380 | 2875 | 1904 | 1.51 | Sym  | 3057 | 2658 | 1.15 |
| Control | 381 | 3093 | 2474 | 1.25 | Sym  | 2043 | 2491 | 0.82 |

|         |     |      |      |      |      |      |      |      |
|---------|-----|------|------|------|------|------|------|------|
| Control | 383 | 2840 | 1552 | 1.83 | Sym  | 2986 | 1788 | 1.67 |
| Control | 384 | 2214 | 1350 | 1.64 | Sym  | 2773 | 2330 | 1.19 |
| Control | 385 | 3144 | 2807 | 1.12 | Sym  | 3291 | 2438 | 1.35 |
| Control | 386 | 3078 | 2824 | 1.09 | Sym  | 3219 | 2596 | 1.24 |
| Control | 387 | 2057 | 1480 | 1.39 | Sym  | 3130 | 2653 | 1.18 |
| Control | 388 | 1886 | 317  | 5.95 | Asym | 3194 | 897  | 3.56 |
| Control | 389 | 3239 | 2037 | 1.59 | Sym  | 2667 | 3175 | 0.84 |
| Control | 390 | 3295 | 550  | 5.99 | Asym | 2146 | 613  | 3.5  |
| Control | 391 | 1923 | 1748 | 1.1  | Sym  | 1926 | 1035 | 1.86 |
| Control | 392 | 2202 | 1866 | 1.18 | Sym  | 3078 | 2080 | 1.48 |
| Control | 393 | 2045 | 1088 | 1.88 | Sym  | 2484 | 2791 | 0.89 |
| Control | 394 | 1879 | 1112 | 1.69 | Sym  | 3219 | 1975 | 1.63 |
| Control | 395 | 3472 | 753  | 4.61 | Asym | 2167 | 467  | 4.64 |
| Control | 396 | 2446 | 1653 | 1.48 | Sym  | 3142 | 2554 | 1.23 |
| Control | 397 | 2305 | 1273 | 1.81 | Sym  | 2507 | 2532 | 0.99 |
| Control | 398 | 1873 | 1058 | 1.77 | Sym  | 2944 | 1558 | 1.89 |
| Control | 399 | 2844 | 1847 | 1.54 | Sym  | 2417 | 1998 | 1.21 |
| Control | 400 | 2189 | 1377 | 1.59 | Sym  | 2664 | 2003 | 1.33 |

| Group   | Pair cell No | BrdU intensive value |             | Relative value | Pair cell type |
|---------|--------------|----------------------|-------------|----------------|----------------|
|         |              | First cell           | Second cell |                |                |
| SOX9 KO | 1            | 2457                 | 1935        | 1.27           | sym            |
| SOX9 KO | 2            | 3489                 | 1608        | 2.17           | asym           |
| SOX9 KO | 3            | 1834                 | 981         | 1.87           | sym            |
| SOX9 KO | 4            | 3139                 | 3527        | 0.89           | sym            |
| SOX9 KO | 5            | 2537                 | 1738        | 1.46           | sym            |
| SOX9 KO | 6            | 3370                 | 711         | 4.74           | asym           |
| SOX9 KO | 7            | 3336                 | 808         | 4.13           | asym           |
| SOX9 KO | 8            | 2404                 | 1098        | 2.19           | asym           |
| SOX9 KO | 9            | 1893                 | 1564        | 1.21           | sym            |
| SOX9 KO | 10           | 2285                 | 647         | 3.53           | asym           |
| SOX9 KO | 11           | 2363                 | 538         | 4.39           | asym           |
| SOX9 KO | 12           | 2993                 | 2093        | 1.43           | sym            |
| SOX9 KO | 13           | 3421                 | 2461        | 1.39           | sym            |
| SOX9 KO | 14           | 2769                 | 473         | 5.85           | asym           |
| SOX9 KO | 15           | 3103                 | 1410        | 2.2            | asym           |
| SOX9 KO | 16           | 3019                 | 609         | 4.96           | asym           |
| SOX9 KO | 17           | 2793                 | 3365        | 0.83           | sym            |
| SOX9 KO | 18           | 2749                 | 553         | 4.97           | asym           |
| SOX9 KO | 19           | 2526                 | 460         | 5.49           | asym           |
| SOX9 KO | 20           | 3363                 | 623         | 5.4            | asym           |
| SOX9 KO | 21           | 2463                 | 650         | 3.79           | asym           |
| SOX9 KO | 22           | 2798                 | 758         | 3.69           | asym           |
| SOX9 KO | 23           | 2811                 | 1779        | 1.58           | sym            |
| SOX9 KO | 24           | 2574                 | 797         | 3.23           | asym           |
| SOX9 KO | 25           | 2144                 | 2233        | 0.96           | sym            |
| SOX9 KO | 26           | 3186                 | 3063        | 1.04           | sym            |
| SOX9 KO | 27           | 3233                 | 860         | 3.76           | asym           |
| SOX9 KO | 28           | 2729                 | 600         | 4.55           | asym           |
| SOX9 KO | 29           | 3052                 | 1413        | 2.16           | asym           |
| SOX9 KO | 30           | 2330                 | 649         | 3.59           | asym           |
| SOX9 KO | 31           | 2101                 | 515         | 4.08           | asym           |
| SOX9 KO | 32           | 2172                 | 405         | 5.36           | asym           |
| SOX9 KO | 33           | 3190                 | 2045        | 1.56           | sym            |
| SOX9 KO | 34           | 2326                 | 538         | 4.32           | asym           |
| SOX9 KO | 35           | 2174                 | 460         | 4.73           | asym           |
| SOX9 KO | 36           | 2492                 | 586         | 4.25           | asym           |
| SOX9 KO | 37           | 3210                 | 633         | 5.07           | asym           |
| SOX9 KO | 38           | 2045                 | 387         | 5.29           | asym           |
| SOX9 KO | 39           | 1987                 | 662         | 3              | asym           |
| SOX9 KO | 40           | 1896                 | 1003        | 1.89           | sym            |
| SOX9 KO | 41           | 3302                 | 622         | 5.31           | asym           |
| SOX9 KO | 42           | 1989                 | 739         | 2.69           | asym           |
| SOX9 KO | 43           | 3215                 | 563         | 5.71           | asym           |
| SOX9 KO | 44           | 2794                 | 573         | 4.88           | asym           |
| SOX9 KO | 45           | 2691                 | 527         | 5.11           | asym           |
| SOX9 KO | 46           | 2977                 | 2222        | 1.34           | sym            |
| SOX9 KO | 47           | 3346                 | 1809        | 1.85           | sym            |
| SOX9 KO | 48           | 3376                 | 1468        | 2.3            | asym           |
| SOX9 KO | 49           | 2692                 | 680         | 3.96           | asym           |
| SOX9 KO | 50           | 3374                 | 2678        | 1.26           | sym            |
| SOX9 KO | 51           | 2740                 | 1305        | 2.1            | asym           |
| SOX9 KO | 52           | 1878                 | 1015        | 1.85           | sym            |
| SOX9 KO | 53           | 1874                 | 352         | 5.33           | asym           |
| SOX9 KO | 54           | 3134                 | 2798        | 1.12           | sym            |
| SOX9 KO | 55           | 2643                 | 626         | 4.22           | asym           |
| SOX9 KO | 56           | 2107                 | 2107        | 1              | sym            |



|         |     |      |      |      |      |
|---------|-----|------|------|------|------|
| SOX9 KO | 58  | 3408 | 659  | 5.17 | asym |
| SOX9 KO | 59  | 2655 | 491  | 5.41 | asym |
| SOX9 KO | 60  | 3137 | 1936 | 1.62 | sym  |
| SOX9 KO | 61  | 2486 | 2021 | 1.23 | sym  |
| SOX9 KO | 62  | 3022 | 2159 | 1.4  | sym  |
| SOX9 KO | 63  | 3080 | 3111 | 0.99 | sym  |
| SOX9 KO | 64  | 3409 | 668  | 5.1  | asym |
| SOX9 KO | 65  | 2167 | 1321 | 1.64 | sym  |
| SOX9 KO | 66  | 3348 | 1913 | 1.75 | sym  |
| SOX9 KO | 67  | 3423 | 2876 | 1.19 | sym  |
| SOX9 KO | 68  | 3169 | 1434 | 2.21 | asym |
| SOX9 KO | 69  | 2751 | 972  | 2.83 | asym |
| SOX9 KO | 70  | 3053 | 670  | 4.56 | asym |
| SOX9 KO | 71  | 2082 | 448  | 4.65 | asym |
| SOX9 KO | 72  | 2387 | 449  | 5.32 | asym |
| SOX9 KO | 73  | 1894 | 734  | 2.58 | asym |
| SOX9 KO | 74  | 2326 | 1593 | 1.46 | sym  |
| SOX9 KO | 75  | 2275 | 813  | 2.8  | asym |
| SOX9 KO | 76  | 2940 | 964  | 3.05 | asym |
| SOX9 KO | 77  | 1961 | 1083 | 1.81 | sym  |
| SOX9 KO | 78  | 2550 | 1861 | 1.37 | sym  |
| SOX9 KO | 79  | 2016 | 1102 | 1.83 | sym  |
| SOX9 KO | 80  | 3313 | 872  | 3.8  | asym |
| SOX9 KO | 81  | 2519 | 692  | 3.64 | asym |
| SOX9 KO | 82  | 2164 | 2081 | 1.04 | sym  |
| SOX9 KO | 83  | 3483 | 1935 | 1.8  | sym  |
| SOX9 KO | 84  | 2734 | 673  | 4.06 | asym |
| SOX9 KO | 85  | 2347 | 1575 | 1.49 | sym  |
| SOX9 KO | 86  | 3071 | 1312 | 2.34 | asym |
| SOX9 KO | 87  | 3400 | 2411 | 1.41 | sym  |
| SOX9 KO | 88  | 1876 | 361  | 5.2  | asym |
| SOX9 KO | 89  | 2740 | 1489 | 1.84 | sym  |
| SOX9 KO | 90  | 3034 | 1850 | 1.64 | sym  |
| SOX9 KO | 91  | 2782 | 756  | 3.68 | asym |
| SOX9 KO | 92  | 1936 | 371  | 5.22 | asym |
| SOX9 KO | 93  | 2932 | 583  | 5.03 | asym |
| SOX9 KO | 94  | 3477 | 2484 | 1.4  | sym  |
| SOX9 KO | 95  | 2657 | 631  | 4.21 | asym |
| SOX9 KO | 96  | 2240 | 1483 | 1.51 | sym  |
| SOX9 KO | 97  | 3310 | 680  | 4.87 | asym |
| SOX9 KO | 98  | 3339 | 1484 | 2.25 | asym |
| SOX9 KO | 99  | 2179 | 364  | 5.99 | asym |
| SOX9 KO | 100 | 3354 | 1863 | 1.8  | sym  |
| SOX9 KO | 101 | 2244 | 1344 | 1.67 | sym  |
| SOX9 KO | 102 | 3461 | 3762 | 0.92 | sym  |
| SOX9 KO | 103 | 2140 | 866  | 2.47 | asym |
| SOX9 KO | 104 | 3323 | 3135 | 1.06 | sym  |
| SOX9 KO | 105 | 3120 | 726  | 4.3  | asym |
| SOX9 KO | 106 | 2451 | 1377 | 1.78 | sym  |
| SOX9 KO | 107 | 3318 | 3770 | 0.88 | sym  |
| SOX9 KO | 108 | 3341 | 1498 | 2.23 | asym |
| SOX9 KO | 109 | 2565 | 530  | 4.84 | asym |
| SOX9 KO | 110 | 2378 | 1071 | 2.22 | asym |
| SOX9 KO | 111 | 2373 | 804  | 2.95 | asym |
| SOX9 KO | 112 | 2932 | 891  | 3.29 | asym |
| SOX9 KO | 113 | 2800 | 685  | 4.09 | asym |
| SOX9 KO | 114 | 2265 | 521  | 4.35 | asym |
| SOX9 KO | 115 | 2669 | 699  | 3.82 | asym |

|         |     |      |      |      |      |
|---------|-----|------|------|------|------|
| SOX9 KO | 117 | 2610 | 2270 | 1.15 | sym  |
| SOX9 KO | 118 | 1883 | 1207 | 1.56 | sym  |
| SOX9 KO | 119 | 3220 | 739  | 4.36 | asym |
| SOX9 KO | 120 | 2807 | 1040 | 2.7  | asym |
| SOX9 KO | 121 | 2117 | 1997 | 1.06 | sym  |
| SOX9 KO | 122 | 2799 | 1854 | 1.51 | sym  |
| SOX9 KO | 123 | 2154 | 2071 | 1.04 | sym  |
| SOX9 KO | 124 | 3169 | 767  | 4.13 | asym |
| SOX9 KO | 125 | 2781 | 590  | 4.71 | asym |
| SOX9 KO | 126 | 2522 | 1025 | 2.46 | asym |
| SOX9 KO | 127 | 2487 | 1463 | 1.7  | sym  |
| SOX9 KO | 128 | 2540 | 656  | 3.87 | asym |
| SOX9 KO | 129 | 2208 | 2165 | 1.02 | sym  |
| SOX9 KO | 130 | 3478 | 2655 | 1.31 | sym  |
| SOX9 KO | 131 | 3480 | 1294 | 2.69 | asym |
| SOX9 KO | 132 | 2709 | 1101 | 2.46 | asym |
| SOX9 KO | 133 | 1831 | 1213 | 1.51 | sym  |
| SOX9 KO | 134 | 3023 | 769  | 3.93 | asym |
| SOX9 KO | 135 | 2552 | 448  | 5.7  | asym |
| SOX9 KO | 136 | 2030 | 446  | 4.55 | asym |
| SOX9 KO | 137 | 3230 | 1700 | 1.9  | sym  |
| SOX9 KO | 138 | 1960 | 2390 | 0.82 | sym  |
| SOX9 KO | 139 | 2335 | 1588 | 1.47 | sym  |
| SOX9 KO | 140 | 2434 | 573  | 4.25 | asym |
| SOX9 KO | 141 | 2680 | 597  | 4.49 | asym |
| SOX9 KO | 142 | 3474 | 1941 | 1.79 | sym  |
| SOX9 KO | 143 | 2990 | 849  | 3.52 | asym |
| SOX9 KO | 144 | 2469 | 802  | 3.08 | asym |
| SOX9 KO | 145 | 3251 | 3737 | 0.87 | sym  |
| SOX9 KO | 146 | 1976 | 413  | 4.78 | asym |
| SOX9 KO | 147 | 2528 | 1053 | 2.4  | asym |
| SOX9 KO | 148 | 2600 | 2680 | 0.97 | sym  |
| SOX9 KO | 149 | 2525 | 1065 | 2.37 | asym |
| SOX9 KO | 150 | 3036 | 693  | 4.38 | asym |
| SOX9 KO | 151 | 2196 | 1255 | 1.75 | sym  |
| SOX9 KO | 152 | 3199 | 824  | 3.88 | asym |
| SOX9 KO | 153 | 2645 | 1191 | 2.22 | asym |
| SOX9 KO | 154 | 2142 | 571  | 3.75 | asym |
| SOX9 KO | 155 | 2905 | 730  | 3.98 | asym |
| SOX9 KO | 156 | 2879 | 1986 | 1.45 | sym  |
| SOX9 KO | 157 | 1987 | 475  | 4.18 | asym |
| SOX9 KO | 158 | 2484 | 463  | 5.37 | asym |
| SOX9 KO | 159 | 2516 | 1108 | 2.27 | asym |
| SOX9 KO | 160 | 1831 | 852  | 2.15 | asym |
| SOX9 KO | 161 | 2578 | 2261 | 1.14 | sym  |
| SOX9 KO | 162 | 3387 | 746  | 4.54 | asym |
| SOX9 KO | 163 | 1940 | 2205 | 0.88 | sym  |
| SOX9 KO | 164 | 2211 | 1208 | 1.83 | sym  |
| SOX9 KO | 165 | 2542 | 1599 | 1.59 | sym  |
| SOX9 KO | 166 | 3222 | 571  | 5.64 | asym |
| SOX9 KO | 167 | 2197 | 1758 | 1.25 | sym  |
| SOX9 KO | 168 | 3176 | 1035 | 3.07 | asym |
| SOX9 KO | 169 | 3495 | 657  | 5.32 | asym |
| SOX9 KO | 170 | 2681 | 779  | 3.44 | asym |
| SOX9 KO | 171 | 2736 | 516  | 5.3  | asym |
| SOX9 KO | 172 | 3102 | 1951 | 1.59 | sym  |
| SOX9 KO | 173 | 2884 | 3517 | 0.82 | sym  |
| SOX9 KO | 174 | 2578 | 914  | 2.82 | asym |

|         |     |      |      |      |      |
|---------|-----|------|------|------|------|
| SOX9 KO | 176 | 3151 | 552  | 5.71 | asym |
| SOX9 KO | 177 | 2835 | 2116 | 1.34 | sym  |
| SOX9 KO | 178 | 2753 | 2294 | 1.2  | sym  |
| SOX9 KO | 179 | 2852 | 3355 | 0.85 | sym  |
| SOX9 KO | 180 | 3174 | 1312 | 2.42 | asym |
| SOX9 KO | 181 | 2936 | 1631 | 1.8  | sym  |
| SOX9 KO | 182 | 2564 | 458  | 5.6  | asym |
| SOX9 KO | 183 | 2540 | 1984 | 1.28 | sym  |
| SOX9 KO | 184 | 2994 | 1983 | 1.51 | sym  |
| SOX9 KO | 185 | 2056 | 875  | 2.35 | asym |
| SOX9 KO | 186 | 2258 | 469  | 4.81 | asym |
| SOX9 KO | 187 | 1951 | 461  | 4.23 | asym |
| SOX9 KO | 188 | 3399 | 3332 | 1.02 | sym  |
| SOX9 KO | 189 | 2956 | 778  | 3.8  | asym |
| SOX9 KO | 190 | 2479 | 1967 | 1.26 | sym  |
| SOX9 KO | 191 | 2128 | 434  | 4.9  | asym |
| SOX9 KO | 192 | 2447 | 1735 | 1.41 | sym  |
| SOX9 KO | 193 | 2542 | 782  | 3.25 | asym |
| SOX9 KO | 194 | 2781 | 2439 | 1.14 | sym  |
| SOX9 KO | 195 | 3331 | 672  | 4.96 | asym |
| SOX9 KO | 196 | 3072 | 590  | 5.21 | asym |
| SOX9 KO | 197 | 2413 | 2462 | 0.98 | sym  |
| SOX9 KO | 198 | 2345 | 489  | 4.8  | asym |
| SOX9 KO | 199 | 2949 | 2920 | 1.01 | sym  |
| SOX9 KO | 200 | 3200 | 1758 | 1.82 | sym  |
| SOX9 KO | 201 | 2420 | 441  | 5.49 | asym |
| SOX9 KO | 202 | 3364 | 609  | 5.52 | asym |
| SOX9 KO | 203 | 3346 | 818  | 4.09 | asym |
| SOX9 KO | 204 | 2366 | 1024 | 2.31 | asym |
| SOX9 KO | 205 | 3042 | 1800 | 1.69 | sym  |
| SOX9 KO | 206 | 3384 | 819  | 4.13 | asym |
| SOX9 KO | 207 | 3370 | 1518 | 2.22 | asym |
| SOX9 KO | 208 | 2406 | 2480 | 0.97 | sym  |
| SOX9 KO | 209 | 2238 | 1250 | 1.79 | sym  |
| SOX9 KO | 210 | 2086 | 491  | 4.25 | asym |
| SOX9 KO | 211 | 2643 | 1716 | 1.54 | sym  |
| SOX9 KO | 212 | 3402 | 1087 | 3.13 | asym |
| SOX9 KO | 213 | 2983 | 2572 | 1.16 | sym  |
| SOX9 KO | 214 | 2800 | 903  | 3.1  | asym |
| SOX9 KO | 215 | 2027 | 630  | 3.22 | asym |
| SOX9 KO | 216 | 2325 | 2193 | 1.06 | sym  |
| SOX9 KO | 217 | 2679 | 690  | 3.88 | asym |
| SOX9 KO | 218 | 2764 | 634  | 4.36 | asym |
| SOX9 KO | 219 | 2261 | 499  | 4.53 | asym |
| SOX9 KO | 220 | 2581 | 2225 | 1.16 | sym  |
| SOX9 KO | 221 | 3236 | 624  | 5.19 | asym |
| SOX9 KO | 222 | 2943 | 772  | 3.81 | asym |
| SOX9 KO | 223 | 1989 | 1894 | 1.05 | sym  |
| SOX9 KO | 224 | 1936 | 338  | 5.72 | asym |
| SOX9 KO | 225 | 3287 | 643  | 5.11 | asym |
| SOX9 KO | 226 | 2232 | 535  | 4.17 | asym |
| SOX9 KO | 227 | 2082 | 1498 | 1.39 | sym  |
| SOX9 KO | 228 | 2949 | 1180 | 2.5  | asym |
| SOX9 KO | 229 | 3117 | 2474 | 1.26 | sym  |
| SOX9 KO | 230 | 3089 | 2914 | 1.06 | sym  |
| SOX9 KO | 231 | 3104 | 892  | 3.48 | asym |
| SOX9 KO | 232 | 2361 | 843  | 2.8  | asym |
| SOX9 KO | 233 | 2284 | 1368 | 1.67 | sym  |

|         |     |      |      |      |      |
|---------|-----|------|------|------|------|
| SOX9 KO | 235 | 2638 | 1832 | 1.44 | sym  |
| SOX9 KO | 236 | 2387 | 793  | 3.01 | asym |
| SOX9 KO | 237 | 2453 | 810  | 3.03 | asym |
| SOX9 KO | 238 | 2828 | 2525 | 1.12 | sym  |
| SOX9 KO | 239 | 2356 | 854  | 2.76 | asym |
| SOX9 KO | 240 | 3485 | 734  | 4.75 | asym |
| SOX9 KO | 241 | 2256 | 1484 | 1.52 | sym  |
| SOX9 KO | 242 | 3119 | 3318 | 0.94 | sym  |
| SOX9 KO | 243 | 2163 | 781  | 2.77 | asym |
| SOX9 KO | 244 | 2058 | 593  | 3.47 | asym |
| SOX9 KO | 245 | 3124 | 2125 | 1.47 | sym  |
| SOX9 KO | 246 | 2382 | 603  | 3.95 | asym |
| SOX9 KO | 247 | 2179 | 376  | 5.79 | asym |
| SOX9 KO | 248 | 2478 | 1158 | 2.14 | asym |
| SOX9 KO | 249 | 3432 | 2119 | 1.62 | sym  |
| SOX9 KO | 250 | 2850 | 1135 | 2.51 | asym |
| SOX9 KO | 251 | 2382 | 1861 | 1.28 | sym  |
| SOX9 KO | 252 | 1976 | 1098 | 1.8  | sym  |
| SOX9 KO | 253 | 2155 | 623  | 3.46 | asym |
| SOX9 KO | 254 | 2237 | 968  | 2.31 | asym |
| SOX9 KO | 255 | 2539 | 2287 | 1.11 | sym  |
| SOX9 KO | 256 | 1931 | 815  | 2.37 | asym |
| SOX9 KO | 257 | 2712 | 2260 | 1.2  | sym  |
| SOX9 KO | 258 | 3046 | 2957 | 1.03 | sym  |
| SOX9 KO | 259 | 2560 | 977  | 2.62 | asym |
| SOX9 KO | 260 | 3211 | 907  | 3.54 | asym |
| SOX9 KO | 261 | 2979 | 676  | 4.41 | asym |
| SOX9 KO | 262 | 2423 | 2264 | 1.07 | sym  |
| SOX9 KO | 263 | 1950 | 418  | 4.66 | asym |
| SOX9 KO | 264 | 2240 | 1445 | 1.55 | sym  |
| SOX9 KO | 265 | 2316 | 481  | 4.81 | asym |
| SOX9 KO | 266 | 3410 | 2368 | 1.44 | sym  |
| SOX9 KO | 267 | 2068 | 614  | 3.37 | asym |
| SOX9 KO | 268 | 3416 | 1366 | 2.5  | asym |
| SOX9 KO | 269 | 2798 | 962  | 2.91 | asym |
| SOX9 KO | 270 | 2181 | 1474 | 1.48 | sym  |
| SOX9 KO | 271 | 2566 | 2138 | 1.2  | sym  |
| SOX9 KO | 272 | 1853 | 504  | 3.68 | asym |
| SOX9 KO | 273 | 1951 | 1774 | 1.1  | sym  |
| SOX9 KO | 274 | 1988 | 825  | 2.41 | asym |
| SOX9 KO | 275 | 3210 | 540  | 5.94 | asym |
| SOX9 KO | 276 | 3381 | 672  | 5.03 | asym |
| SOX9 KO | 277 | 2969 | 800  | 3.71 | asym |
| SOX9 KO | 278 | 2440 | 493  | 4.95 | asym |
| SOX9 KO | 279 | 3057 | 2805 | 1.09 | sym  |
| SOX9 KO | 280 | 3010 | 645  | 4.67 | asym |
| SOX9 KO | 281 | 3347 | 720  | 4.65 | asym |
| SOX9 KO | 282 | 2714 | 694  | 3.91 | asym |
| SOX9 KO | 283 | 3398 | 3861 | 0.88 | sym  |
| SOX9 KO | 284 | 3455 | 1294 | 2.67 | asym |
| SOX9 KO | 285 | 3144 | 682  | 4.61 | asym |
| SOX9 KO | 286 | 3213 | 2700 | 1.19 | sym  |
| SOX9 KO | 287 | 2344 | 1789 | 1.31 | sym  |
| SOX9 KO | 288 | 2194 | 1199 | 1.83 | sym  |
| SOX9 KO | 289 | 2490 | 626  | 3.98 | asym |
| SOX9 KO | 290 | 2428 | 2961 | 0.82 | sym  |
| SOX9 KO | 291 | 3344 | 947  | 3.53 | asym |
| SOX9 KO | 292 | 2796 | 808  | 3.46 | asym |

|         |     |      |      |      |      |
|---------|-----|------|------|------|------|
| SOX9 KO | 294 | 2071 | 1593 | 1.3  | sym  |
| SOX9 KO | 295 | 2715 | 3157 | 0.86 | sym  |
| SOX9 KO | 296 | 2306 | 2261 | 1.02 | sym  |
| SOX9 KO | 297 | 2374 | 2047 | 1.16 | sym  |
| SOX9 KO | 298 | 2589 | 1370 | 1.89 | sym  |
| SOX9 KO | 299 | 1807 | 376  | 4.8  | asym |
| SOX9 KO | 300 | 2316 | 510  | 4.54 | asym |
| SOX9 KO | 301 | 2614 | 1665 | 1.57 | sym  |
| SOX9 KO | 302 | 3218 | 2750 | 1.17 | sym  |
| SOX9 KO | 303 | 2132 | 420  | 5.08 | asym |
| SOX9 KO | 304 | 1853 | 674  | 2.75 | asym |
| SOX9 KO | 305 | 3048 | 2959 | 1.03 | sym  |
| SOX9 KO | 306 | 2376 | 410  | 5.79 | asym |
| SOX9 KO | 307 | 3420 | 748  | 4.57 | asym |
| SOX9 KO | 308 | 2789 | 518  | 5.38 | asym |
| SOX9 KO | 309 | 3410 | 3444 | 0.99 | sym  |
| SOX9 KO | 310 | 2269 | 1240 | 1.83 | sym  |
| SOX9 KO | 311 | 1813 | 991  | 1.83 | sym  |
| SOX9 KO | 312 | 1815 | 390  | 4.65 | asym |
| SOX9 KO | 313 | 2504 | 532  | 4.71 | asym |
| SOX9 KO | 314 | 2303 | 1212 | 1.9  | sym  |
| SOX9 KO | 315 | 2255 | 532  | 4.24 | asym |
| SOX9 KO | 316 | 2486 | 528  | 4.71 | asym |
| SOX9 KO | 317 | 2799 | 1206 | 2.32 | asym |
| SOX9 KO | 318 | 1868 | 625  | 2.99 | asym |
| SOX9 KO | 319 | 3273 | 689  | 4.75 | asym |
| SOX9 KO | 320 | 2193 | 2611 | 0.84 | sym  |
| SOX9 KO | 321 | 1967 | 596  | 3.3  | asym |
| SOX9 KO | 322 | 3337 | 3667 | 0.91 | sym  |
| SOX9 KO | 323 | 2104 | 1783 | 1.18 | sym  |
| SOX9 KO | 324 | 2733 | 2024 | 1.35 | sym  |
| SOX9 KO | 325 | 2853 | 3566 | 0.8  | sym  |
| SOX9 KO | 326 | 2276 | 2014 | 1.13 | sym  |
| SOX9 KO | 327 | 2041 | 1701 | 1.2  | sym  |
| SOX9 KO | 328 | 3002 | 1225 | 2.45 | asym |
| SOX9 KO | 329 | 1881 | 1425 | 1.32 | sym  |
| SOX9 KO | 330 | 2415 | 1438 | 1.68 | sym  |
| SOX9 KO | 331 | 2267 | 1326 | 1.71 | sym  |
| SOX9 KO | 332 | 3387 | 2016 | 1.68 | sym  |
| SOX9 KO | 333 | 2457 | 2118 | 1.16 | sym  |
| SOX9 KO | 334 | 3201 | 655  | 4.89 | asym |
| SOX9 KO | 335 | 2242 | 1446 | 1.55 | sym  |
| SOX9 KO | 336 | 3088 | 800  | 3.86 | asym |
| SOX9 KO | 337 | 3167 | 825  | 3.84 | asym |
| SOX9 KO | 338 | 3362 | 2923 | 1.15 | sym  |
| SOX9 KO | 339 | 3422 | 1494 | 2.29 | asym |
| SOX9 KO | 340 | 2297 | 424  | 5.42 | asym |
| SOX9 KO | 341 | 2629 | 1891 | 1.39 | sym  |
| SOX9 KO | 342 | 2149 | 1761 | 1.22 | sym  |
| SOX9 KO | 343 | 2583 | 452  | 5.71 | asym |
| SOX9 KO | 344 | 3098 | 863  | 3.59 | asym |
| SOX9 KO | 345 | 2254 | 780  | 2.89 | asym |
| SOX9 KO | 346 | 2474 | 2079 | 1.19 | sym  |
| SOX9 KO | 347 | 2362 | 438  | 5.39 | asym |
| SOX9 KO | 348 | 2602 | 2387 | 1.09 | sym  |
| SOX9 KO | 349 | 2989 | 2959 | 1.01 | sym  |
| SOX9 KO | 350 | 1848 | 570  | 3.24 | asym |
| SOX9 KO | 351 | 2702 | 2729 | 0.99 | sym  |

|         |     |      |      |      |      |
|---------|-----|------|------|------|------|
| SOX9 KO | 353 | 2625 | 2134 | 1.23 | sym  |
| SOX9 KO | 354 | 2482 | 489  | 5.08 | asym |
| SOX9 KO | 355 | 2645 | 1438 | 1.84 | sym  |
| SOX9 KO | 356 | 3310 | 1403 | 2.36 | asym |
| SOX9 KO | 357 | 3312 | 928  | 3.57 | asym |
| SOX9 KO | 358 | 1848 | 590  | 3.13 | asym |
| SOX9 KO | 359 | 3285 | 550  | 5.97 | asym |
| SOX9 KO | 360 | 2927 | 895  | 3.27 | asym |
| SOX9 KO | 361 | 2484 | 444  | 5.6  | asym |
| SOX9 KO | 362 | 2751 | 1937 | 1.42 | sym  |
| SOX9 KO | 363 | 2386 | 1491 | 1.6  | sym  |
| SOX9 KO | 364 | 2299 | 386  | 5.95 | asym |
| SOX9 KO | 365 | 3219 | 572  | 5.63 | asym |
| SOX9 KO | 366 | 2727 | 770  | 3.54 | asym |
| SOX9 KO | 367 | 2122 | 2002 | 1.06 | sym  |
| SOX9 KO | 368 | 3453 | 778  | 4.44 | asym |
| SOX9 KO | 369 | 1883 | 2325 | 0.81 | sym  |
| SOX9 KO | 370 | 2584 | 1770 | 1.46 | sym  |
| SOX9 KO | 371 | 2829 | 604  | 4.68 | asym |
| SOX9 KO | 372 | 1942 | 486  | 4    | asym |
| SOX9 KO | 373 | 1953 | 458  | 4.26 | asym |
| SOX9 KO | 374 | 2881 | 689  | 4.18 | asym |
| SOX9 KO | 375 | 3299 | 1274 | 2.59 | asym |
| SOX9 KO | 376 | 2217 | 414  | 5.35 | asym |
| SOX9 KO | 377 | 2982 | 1744 | 1.71 | sym  |
| SOX9 KO | 378 | 3081 | 663  | 4.65 | asym |
| SOX9 KO | 379 | 3127 | 1681 | 1.86 | sym  |
| SOX9 KO | 380 | 1914 | 1622 | 1.18 | sym  |
| SOX9 KO | 381 | 3450 | 2315 | 1.49 | sym  |
| SOX9 KO | 382 | 2329 | 1941 | 1.2  | sym  |
| SOX9 KO | 383 | 2687 | 496  | 5.42 | asym |
| SOX9 KO | 384 | 1946 | 2237 | 0.87 | sym  |
| SOX9 KO | 385 | 2558 | 1075 | 2.38 | asym |
| SOX9 KO | 386 | 2979 | 2503 | 1.19 | sym  |
| SOX9 KO | 387 | 2888 | 581  | 4.97 | asym |
| SOX9 KO | 388 | 1949 | 805  | 2.42 | asym |
| SOX9 KO | 389 | 2575 | 671  | 3.84 | asym |
| SOX9 KO | 390 | 3377 | 4169 | 0.81 | sym  |
| SOX9 KO | 391 | 2127 | 861  | 2.47 | asym |
| SOX9 KO | 392 | 3275 | 589  | 5.56 | asym |
| SOX9 KO | 393 | 2150 | 1693 | 1.27 | sym  |
| SOX9 KO | 394 | 3160 | 1892 | 1.67 | sym  |
| SOX9 KO | 395 | 1921 | 404  | 4.75 | asym |
| SOX9 KO | 396 | 2294 | 500  | 4.59 | asym |
| SOX9 KO | 397 | 3215 | 2172 | 1.48 | sym  |
| SOX9 KO | 398 | 2881 | 616  | 4.68 | asym |
| SOX9 KO | 399 | 2792 | 821  | 3.4  | asym |
| SOX9 KO | 400 | 3116 | 552  | 5.64 | asym |

| Group   | Pair cell No. | BrdU intensive value |             | Relative value | Pair cell type | SOX9 intensive value |            | Relative value |
|---------|---------------|----------------------|-------------|----------------|----------------|----------------------|------------|----------------|
|         |               | First cell           | Second cell |                |                | First cell           | Second cel |                |
| Control | 1             | 3107                 | 1895        | 1.64           | Sym            | 3326                 | 2376       | 1.4            |
| Control | 2             | 2791                 | 1493        | 1.87           | Sym            | 1841                 | 1841       | 1              |
| Control | 3             | 2869                 | 1839        | 1.56           | Sym            | 3440                 | 3373       | 1.02           |
| Control | 4             | 2433                 | 1978        | 1.23           | Sym            | 2009                 | 1913       | 1.05           |
| Control | 5             | 3083                 | 1880        | 1.64           | Sym            | 3469                 | 2053       | 1.69           |
| Control | 6             | 3160                 | 3901        | 0.81           | Sym            | 3496                 | 2185       | 1.6            |
| Control | 7             | 3025                 | 509         | 5.94           | Asym           | 3158                 | 639        | 4.94           |
| Control | 8             | 2336                 | 2290        | 1.02           | Sym            | 2097                 | 1226       | 1.71           |
| Control | 9             | 3098                 | 2137        | 1.45           | Sym            | 2759                 | 3449       | 0.8            |
| Control | 10            | 2673                 | 779         | 3.43           | Asym           | 3387                 | 857        | 3.95           |
| Control | 11            | 2377                 | 877         | 2.71           | Asym           | 3049                 | 1109       | 2.75           |
| Control | 12            | 3236                 | 613         | 5.28           | Asym           | 3437                 | 629        | 5.46           |
| Control | 13            | 2522                 | 3002        | 0.84           | Sym            | 3048                 | 2628       | 1.16           |
| Control | 14            | 2404                 | 2037        | 1.18           | Sym            | 2932                 | 3119       | 0.94           |
| Control | 15            | 1967                 | 1058        | 1.86           | Sym            | 3146                 | 3243       | 0.97           |
| Control | 16            | 1954                 | 471         | 4.15           | Asym           | 2866                 | 922        | 3.11           |
| Control | 17            | 2525                 | 1419        | 1.78           | Sym            | 3246                 | 2556       | 1.27           |
| Control | 18            | 2771                 | 2664        | 1.04           | Sym            | 2559                 | 2976       | 0.86           |
| Control | 19            | 2285                 | 1377        | 1.66           | Sym            | 2783                 | 3353       | 0.83           |
| Control | 20            | 3275                 | 3522        | 0.93           | Sym            | 1837                 | 1934       | 0.95           |
| Control | 21            | 2783                 | 1538        | 1.81           | Sym            | 2886                 | 1739       | 1.66           |
| Control | 22            | 2304                 | 1800        | 1.28           | Sym            | 2287                 | 2137       | 1.07           |
| Control | 23            | 2310                 | 2063        | 1.12           | Sym            | 3470                 | 2427       | 1.43           |
| Control | 24            | 3415                 | 586         | 5.83           | Asym           | 2566                 | 752        | 3.41           |
| Control | 25            | 2533                 | 2611        | 0.97           | Sym            | 2158                 | 1420       | 1.52           |
| Control | 26            | 3389                 | 2801        | 1.21           | Sym            | 3063                 | 1926       | 1.59           |
| Control | 27            | 1865                 | 1492        | 1.25           | Sym            | 3089                 | 1745       | 1.77           |
| Control | 28            | 1802                 | 459         | 3.93           | Asym           | 2920                 | 697        | 4.19           |
| Control | 29            | 2386                 | 1318        | 1.81           | Sym            | 2133                 | 1262       | 1.69           |
| Control | 30            | 2969                 | 3299        | 0.9            | Sym            | 2312                 | 1418       | 1.63           |
| Control | 31            | 2687                 | 1233        | 2.18           | Asym           | 1922                 | 821        | 2.34           |
| Control | 32            | 2746                 | 1772        | 1.55           | Sym            | 2662                 | 1504       | 1.77           |
| Control | 33            | 2328                 | 1455        | 1.6            | Sym            | 2955                 | 2157       | 1.37           |
| Control | 34            | 3043                 | 3538        | 0.86           | Sym            | 2008                 | 1476       | 1.36           |
| Control | 35            | 2917                 | 2297        | 1.27           | Sym            | 1845                 | 1708       | 1.08           |
| Control | 36            | 2980                 | 2113        | 1.41           | Sym            | 2658                 | 1749       | 1.52           |
| Control | 37            | 1835                 | 1147        | 1.6            | Sym            | 2910                 | 2256       | 1.29           |
| Control | 38            | 2383                 | 2432        | 0.98           | Sym            | 3120                 | 1825       | 1.71           |
| Control | 39            | 2423                 | 985         | 2.46           | Asym           | 2707                 | 957        | 2.83           |
| Control | 40            | 2058                 | 399         | 5.16           | Asym           | 2041                 | 932        | 2.19           |
| Control | 41            | 3337                 | 4070        | 0.82           | Sym            | 2043                 | 1502       | 1.36           |
| Control | 42            | 3179                 | 1999        | 1.59           | Sym            | 2778                 | 1736       | 1.6            |
| Control | 43            | 2561                 | 1778        | 1.44           | Sym            | 2612                 | 1949       | 1.34           |
| Control | 44            | 2731                 | 828         | 3.3            | Asym           | 3190                 | 1512       | 2.11           |
| Control | 45            | 3500                 | 2035        | 1.72           | Sym            | 2829                 | 2319       | 1.22           |
| Control | 46            | 2862                 | 1934        | 1.48           | Sym            | 2737                 | 2683       | 1.02           |
| Control | 47            | 2391                 | 1638        | 1.46           | Sym            | 2500                 | 1645       | 1.52           |
| Control | 48            | 2137                 | 678         | 3.15           | Asym           | 2745                 | 787        | 3.49           |
| Control | 49            | 2181                 | 1947        | 1.12           | Sym            | 2756                 | 2136       | 1.29           |
| Control | 50            | 3086                 | 565         | 5.46           | Asym           | 3132                 | 685        | 4.57           |
| Control | 51            | 2831                 | 765         | 3.7            | Asym           | 2281                 | 592        | 3.85           |
| Control | 52            | 3384                 | 2995        | 1.13           | Sym            | 3407                 | 3663       | 0.93           |
| Control | 53            | 2080                 | 1475        | 1.41           | Sym            | 2011                 | 1070       | 1.88           |
| Control | 54            | 3348                 | 1781        | 1.88           | Sym            | 2590                 | 2910       | 0.89           |
| Control | 55            | 2144                 | 1211        | 1.77           | Sym            | 2023                 | 2248       | 0.9            |
| Control | 56            | 1840                 | 1172        | 1.57           | Sym            | 1804                 | 1596       | 1.13           |
| Control | 57            | 2383                 | 1528        | 1.56           | Sym            | 2225                 | 2023       | 1.1            |
| Control | 58            | 2847                 | 3129        | 0.91           | Sym            | 3247                 | 2706       | 1.2            |
| Control | 59            | 1987                 | 1967        | 1.01           | Sym            | 2710                 | 1760       | 1.54           |
| Control | 60            | 3200                 | 2883        | 1.11           | Sym            | 2303                 | 1265       | 1.82           |
| Control | 61            | 2044                 | 1622        | 1.26           | Sym            | 3147                 | 2518       | 1.25           |

|         |     |      |      |      |      |      |      |      |
|---------|-----|------|------|------|------|------|------|------|
| Control | 63  | 2877 | 558  | 5.16 | Asym | 1903 | 752  | 2.53 |
| Control | 64  | 2069 | 455  | 4.55 | Asym | 3251 | 836  | 3.89 |
| Control | 65  | 2060 | 1504 | 1.37 | Sym  | 2290 | 2602 | 0.88 |
| Control | 66  | 1888 | 1748 | 1.08 | Sym  | 3054 | 3085 | 0.99 |
| Control | 67  | 1951 | 374  | 5.22 | Asym | 2123 | 641  | 3.31 |
| Control | 68  | 2319 | 1770 | 1.31 | Sym  | 2116 | 1383 | 1.53 |
| Control | 69  | 2565 | 2490 | 1.03 | Sym  | 2721 | 2616 | 1.04 |
| Control | 70  | 2229 | 2423 | 0.92 | Sym  | 3121 | 2497 | 1.25 |
| Control | 71  | 3002 | 1632 | 1.84 | Sym  | 2838 | 1957 | 1.45 |
| Control | 72  | 2865 | 3256 | 0.88 | Sym  | 2611 | 1776 | 1.47 |
| Control | 73  | 2122 | 1166 | 1.82 | Sym  | 3303 | 1887 | 1.75 |
| Control | 74  | 2729 | 2052 | 1.33 | Sym  | 3180 | 2585 | 1.23 |
| Control | 75  | 1890 | 1800 | 1.05 | Sym  | 3176 | 2715 | 1.17 |
| Control | 76  | 2717 | 1518 | 1.79 | Sym  | 3445 | 3828 | 0.9  |
| Control | 77  | 2640 | 798  | 3.31 | Asym | 2332 | 785  | 2.97 |
| Control | 78  | 1974 | 1182 | 1.67 | Sym  | 2987 | 3247 | 0.92 |
| Control | 79  | 2480 | 2787 | 0.89 | Sym  | 3320 | 3018 | 1.1  |
| Control | 80  | 1891 | 739  | 2.56 | Asym | 1813 | 393  | 4.61 |
| Control | 81  | 3153 | 1704 | 1.85 | Sym  | 3198 | 1938 | 1.65 |
| Control | 82  | 3361 | 2453 | 1.37 | Sym  | 2560 | 2876 | 0.89 |
| Control | 83  | 3312 | 1937 | 1.71 | Sym  | 3277 | 2324 | 1.41 |
| Control | 84  | 2304 | 1422 | 1.62 | Sym  | 2256 | 2350 | 0.96 |
| Control | 85  | 3121 | 1724 | 1.81 | Sym  | 3103 | 2847 | 1.09 |
| Control | 86  | 3247 | 2423 | 1.34 | Sym  | 1912 | 1346 | 1.42 |
| Control | 87  | 3390 | 3531 | 0.96 | Sym  | 1998 | 1249 | 1.6  |
| Control | 88  | 2292 | 852  | 2.69 | Asym | 2150 | 501  | 4.29 |
| Control | 89  | 2196 | 1580 | 1.39 | Sym  | 3460 | 3495 | 0.99 |
| Control | 90  | 2413 | 2488 | 0.97 | Sym  | 2699 | 2782 | 0.97 |
| Control | 91  | 2242 | 1384 | 1.62 | Sym  | 2600 | 1405 | 1.85 |
| Control | 92  | 2378 | 1843 | 1.29 | Sym  | 2829 | 3143 | 0.9  |
| Control | 93  | 3329 | 3329 | 1    | Sym  | 3350 | 3895 | 0.86 |
| Control | 94  | 2311 | 2889 | 0.8  | Sym  | 2986 | 2619 | 1.14 |
| Control | 95  | 2838 | 2468 | 1.15 | Sym  | 3140 | 2617 | 1.2  |
| Control | 96  | 3296 | 2724 | 1.21 | Sym  | 3431 | 3689 | 0.93 |
| Control | 97  | 2155 | 2113 | 1.02 | Sym  | 2708 | 2579 | 1.05 |
| Control | 98  | 2130 | 1121 | 1.9  | Sym  | 2788 | 2213 | 1.26 |
| Control | 99  | 1822 | 341  | 5.34 | Asym | 2497 | 932  | 2.68 |
| Control | 100 | 2145 | 1198 | 1.79 | Sym  | 3130 | 2032 | 1.54 |
| Control | 101 | 2793 | 2024 | 1.38 | Sym  | 2302 | 2131 | 1.08 |
| Control | 102 | 2785 | 2004 | 1.39 | Sym  | 3440 | 2177 | 1.58 |
| Control | 103 | 2983 | 3278 | 0.91 | Sym  | 3359 | 2452 | 1.37 |
| Control | 104 | 1856 | 1146 | 1.62 | Sym  | 1837 | 2213 | 0.83 |
| Control | 105 | 3060 | 1832 | 1.67 | Sym  | 2685 | 1755 | 1.53 |
| Control | 106 | 3046 | 2986 | 1.02 | Sym  | 2746 | 1644 | 1.67 |
| Control | 107 | 2078 | 1267 | 1.64 | Sym  | 2858 | 1520 | 1.88 |
| Control | 108 | 3039 | 1164 | 2.61 | Asym | 2665 | 478  | 5.57 |
| Control | 109 | 3136 | 2658 | 1.18 | Sym  | 3407 | 2469 | 1.38 |
| Control | 110 | 2958 | 1599 | 1.85 | Sym  | 3101 | 3876 | 0.8  |
| Control | 111 | 2878 | 2525 | 1.14 | Sym  | 3459 | 2724 | 1.27 |
| Control | 112 | 2899 | 3371 | 0.86 | Sym  | 3494 | 2443 | 1.43 |
| Control | 113 | 1867 | 1518 | 1.23 | Sym  | 2293 | 2730 | 0.84 |
| Control | 114 | 2585 | 1596 | 1.62 | Sym  | 1849 | 1849 | 1    |
| Control | 115 | 3015 | 3077 | 0.98 | Sym  | 3240 | 1770 | 1.83 |
| Control | 116 | 3083 | 2028 | 1.52 | Sym  | 1861 | 1465 | 1.27 |
| Control | 117 | 1883 | 1494 | 1.26 | Sym  | 2347 | 1269 | 1.85 |
| Control | 118 | 3061 | 1637 | 1.87 | Sym  | 2255 | 1996 | 1.13 |
| Control | 119 | 2945 | 2975 | 0.99 | Sym  | 3310 | 3805 | 0.87 |
| Control | 120 | 3079 | 530  | 5.81 | Asym | 3451 | 575  | 6    |
| Control | 121 | 2183 | 2568 | 0.85 | Sym  | 2478 | 1362 | 1.82 |
| Control | 122 | 2216 | 1666 | 1.33 | Sym  | 3467 | 3210 | 1.08 |
| Control | 123 | 2877 | 1607 | 1.79 | Sym  | 1986 | 1552 | 1.28 |
| Control | 124 | 3332 | 2164 | 1.54 | Sym  | 1972 | 1565 | 1.26 |
| Control | 125 | 1843 | 986  | 1.87 | Sym  | 2631 | 1790 | 1.47 |



|         |     |      |      |      |      |      |      |      |
|---------|-----|------|------|------|------|------|------|------|
| Control | 127 | 2444 | 2628 | 0.93 | Sym  | 3037 | 2410 | 1.26 |
| Control | 128 | 2638 | 1418 | 1.86 | Sym  | 2224 | 1794 | 1.24 |
| Control | 129 | 2866 | 2429 | 1.18 | Sym  | 3068 | 1733 | 1.77 |
| Control | 130 | 1990 | 1157 | 1.72 | Sym  | 3225 | 2879 | 1.12 |
| Control | 131 | 1837 | 606  | 3.03 | Asym | 2853 | 489  | 5.84 |
| Control | 132 | 2298 | 2298 | 1    | Sym  | 2261 | 1338 | 1.69 |
| Control | 133 | 2337 | 1558 | 1.5  | Sym  | 3427 | 4231 | 0.81 |
| Control | 134 | 2167 | 1642 | 1.32 | Sym  | 2833 | 2485 | 1.14 |
| Control | 135 | 3286 | 2176 | 1.51 | Sym  | 2378 | 2530 | 0.94 |
| Control | 136 | 2518 | 1574 | 1.6  | Sym  | 2488 | 1740 | 1.43 |
| Control | 137 | 2294 | 452  | 5.07 | Asym | 1921 | 374  | 5.13 |
| Control | 138 | 1938 | 474  | 4.09 | Asym | 2441 | 763  | 3.2  |
| Control | 139 | 2567 | 1930 | 1.33 | Sym  | 3093 | 3555 | 0.87 |
| Control | 140 | 2787 | 3441 | 0.81 | Sym  | 2036 | 1725 | 1.18 |
| Control | 141 | 2900 | 2042 | 1.42 | Sym  | 1861 | 1632 | 1.14 |
| Control | 142 | 3445 | 1991 | 1.73 | Sym  | 2185 | 2401 | 0.91 |
| Control | 143 | 2767 | 1870 | 1.48 | Sym  | 2606 | 2190 | 1.19 |
| Control | 144 | 3203 | 2408 | 1.33 | Sym  | 2694 | 3061 | 0.88 |
| Control | 145 | 2291 | 1225 | 1.87 | Sym  | 2503 | 2052 | 1.22 |
| Control | 146 | 2952 | 2400 | 1.23 | Sym  | 3321 | 2913 | 1.14 |
| Control | 147 | 2338 | 1812 | 1.29 | Sym  | 2065 | 2488 | 0.83 |
| Control | 148 | 2554 | 2717 | 0.94 | Sym  | 2450 | 1485 | 1.65 |
| Control | 149 | 2262 | 2486 | 0.91 | Sym  | 2054 | 1698 | 1.21 |
| Control | 150 | 3314 | 680  | 4.87 | Asym | 2949 | 532  | 5.54 |
| Control | 151 | 3338 | 3514 | 0.95 | Sym  | 2757 | 1490 | 1.85 |
| Control | 152 | 2382 | 1751 | 1.36 | Sym  | 1812 | 1461 | 1.24 |
| Control | 153 | 2505 | 1883 | 1.33 | Sym  | 1872 | 1163 | 1.61 |
| Control | 154 | 3167 | 1919 | 1.65 | Sym  | 2658 | 1469 | 1.81 |
| Control | 155 | 2374 | 1326 | 1.79 | Sym  | 3168 | 1676 | 1.89 |
| Control | 156 | 3284 | 4105 | 0.8  | Sym  | 2657 | 2657 | 1    |
| Control | 157 | 2143 | 1315 | 1.63 | Sym  | 2818 | 1917 | 1.47 |
| Control | 158 | 3001 | 2363 | 1.27 | Sym  | 2689 | 1601 | 1.68 |
| Control | 159 | 3193 | 1707 | 1.87 | Sym  | 1828 | 1101 | 1.66 |
| Control | 160 | 1959 | 1076 | 1.82 | Sym  | 2607 | 2507 | 1.04 |
| Control | 161 | 2048 | 1296 | 1.58 | Sym  | 2030 | 2030 | 1    |
| Control | 162 | 2982 | 2242 | 1.33 | Sym  | 3123 | 1764 | 1.77 |
| Control | 163 | 2672 | 2386 | 1.12 | Sym  | 1939 | 1701 | 1.14 |
| Control | 164 | 2331 | 2649 | 0.88 | Sym  | 2105 | 2567 | 0.82 |
| Control | 165 | 1928 | 824  | 2.34 | Asym | 2653 | 448  | 5.92 |
| Control | 166 | 1911 | 1300 | 1.47 | Sym  | 3383 | 3284 | 1.03 |
| Control | 167 | 3365 | 2274 | 1.48 | Sym  | 1861 | 1662 | 1.12 |
| Control | 168 | 2520 | 1326 | 1.9  | Sym  | 2657 | 1510 | 1.76 |
| Control | 169 | 3428 | 2414 | 1.42 | Sym  | 2295 | 1289 | 1.78 |
| Control | 170 | 1911 | 1022 | 1.87 | Sym  | 3295 | 2968 | 1.11 |
| Control | 171 | 2471 | 2025 | 1.22 | Sym  | 3485 | 2766 | 1.26 |
| Control | 172 | 3350 | 2538 | 1.32 | Sym  | 2258 | 1851 | 1.22 |
| Control | 173 | 2425 | 2449 | 0.99 | Sym  | 2915 | 1695 | 1.72 |
| Control | 174 | 3483 | 1427 | 2.44 | Asym | 2252 | 461  | 4.88 |
| Control | 175 | 2906 | 1579 | 1.84 | Sym  | 2792 | 2038 | 1.37 |
| Control | 176 | 2448 | 1033 | 2.37 | Asym | 3158 | 1071 | 2.95 |
| Control | 177 | 2542 | 2173 | 1.17 | Sym  | 2926 | 2167 | 1.35 |
| Control | 178 | 2561 | 1506 | 1.7  | Sym  | 3116 | 2120 | 1.47 |
| Control | 179 | 2699 | 1038 | 2.6  | Asym | 2686 | 619  | 4.34 |
| Control | 180 | 2514 | 1533 | 1.64 | Sym  | 3430 | 2287 | 1.5  |
| Control | 181 | 2278 | 2449 | 0.93 | Sym  | 2294 | 1390 | 1.65 |
| Control | 182 | 2775 | 521  | 5.33 | Asym | 2032 | 498  | 4.08 |
| Control | 183 | 1842 | 1485 | 1.24 | Sym  | 3372 | 2555 | 1.32 |
| Control | 184 | 3407 | 3786 | 0.9  | Sym  | 3266 | 2384 | 1.37 |
| Control | 185 | 2596 | 2917 | 0.89 | Sym  | 2927 | 1673 | 1.75 |
| Control | 186 | 3392 | 736  | 4.61 | Asym | 3041 | 529  | 5.75 |
| Control | 187 | 3363 | 2002 | 1.68 | Sym  | 2912 | 1636 | 1.78 |
| Control | 188 | 2356 | 623  | 3.78 | Asym | 3278 | 967  | 3.39 |
| Control | 189 | 2208 | 2567 | 0.86 | Sym  | 3329 | 2581 | 1.29 |

|         |     |      |      |      |      |      |      |      |
|---------|-----|------|------|------|------|------|------|------|
| Control | 191 | 2134 | 1192 | 1.79 | Sym  | 3042 | 1728 | 1.76 |
| Control | 192 | 2902 | 3120 | 0.93 | Sym  | 3403 | 1923 | 1.77 |
| Control | 193 | 2068 | 1149 | 1.8  | Sym  | 2378 | 1711 | 1.39 |
| Control | 194 | 2899 | 2989 | 0.97 | Sym  | 3043 | 1855 | 1.64 |
| Control | 195 | 2505 | 1193 | 2.1  | Asym | 3275 | 1187 | 2.76 |
| Control | 196 | 1862 | 1017 | 1.83 | Sym  | 2751 | 1752 | 1.57 |
| Control | 197 | 3405 | 2169 | 1.57 | Sym  | 2497 | 1621 | 1.54 |
| Control | 198 | 3043 | 3538 | 0.86 | Sym  | 2144 | 1702 | 1.26 |
| Control | 199 | 3449 | 1982 | 1.74 | Sym  | 2382 | 2561 | 0.93 |
| Control | 200 | 2726 | 2869 | 0.95 | Sym  | 2408 | 1584 | 1.52 |
| Control | 201 | 2571 | 608  | 4.23 | Asym | 2298 | 672  | 3.42 |
| Control | 202 | 3183 | 1840 | 1.73 | Sym  | 3331 | 2431 | 1.37 |
| Control | 203 | 2638 | 3032 | 0.87 | Sym  | 3009 | 1729 | 1.74 |
| Control | 204 | 2372 | 1811 | 1.31 | Sym  | 2490 | 1886 | 1.32 |
| Control | 205 | 2343 | 2130 | 1.1  | Sym  | 3085 | 3085 | 1    |
| Control | 206 | 2393 | 790  | 3.03 | Asym | 3272 | 1194 | 2.74 |
| Control | 207 | 2930 | 2007 | 1.46 | Sym  | 2050 | 2412 | 0.85 |
| Control | 208 | 2093 | 1325 | 1.58 | Sym  | 3420 | 3758 | 0.91 |
| Control | 209 | 3243 | 1977 | 1.64 | Sym  | 3073 | 2227 | 1.38 |
| Control | 210 | 2866 | 701  | 4.09 | Asym | 2785 | 523  | 5.33 |
| Control | 211 | 2201 | 2057 | 1.07 | Sym  | 2802 | 2437 | 1.15 |
| Control | 212 | 2198 | 574  | 3.83 | Asym | 2032 | 675  | 3.01 |
| Control | 213 | 3270 | 1787 | 1.83 | Sym  | 1917 | 1229 | 1.56 |
| Control | 214 | 2893 | 1564 | 1.85 | Sym  | 2452 | 1542 | 1.59 |
| Control | 215 | 3423 | 2760 | 1.24 | Sym  | 3371 | 2809 | 1.2  |
| Control | 216 | 3028 | 2940 | 1.03 | Sym  | 2907 | 1938 | 1.5  |
| Control | 217 | 1846 | 1634 | 1.13 | Sym  | 3091 | 2240 | 1.38 |
| Control | 218 | 2159 | 724  | 2.98 | Asym | 2957 | 611  | 4.84 |
| Control | 219 | 2686 | 1421 | 1.89 | Sym  | 2224 | 1951 | 1.14 |
| Control | 220 | 1874 | 1179 | 1.59 | Sym  | 2981 | 1665 | 1.79 |
| Control | 221 | 2330 | 1316 | 1.77 | Sym  | 2172 | 2586 | 0.84 |
| Control | 222 | 2884 | 3315 | 0.87 | Sym  | 2233 | 2376 | 0.94 |
| Control | 223 | 1814 | 2212 | 0.82 | Sym  | 3216 | 1720 | 1.87 |
| Control | 224 | 2732 | 2627 | 1.04 | Sym  | 2563 | 2642 | 0.97 |
| Control | 225 | 3253 | 3354 | 0.97 | Sym  | 2110 | 1529 | 1.38 |
| Control | 226 | 2955 | 3518 | 0.84 | Sym  | 3494 | 2607 | 1.34 |
| Control | 227 | 2107 | 1771 | 1.19 | Sym  | 3465 | 3300 | 1.05 |
| Control | 228 | 2543 | 2734 | 0.93 | Sym  | 3464 | 3012 | 1.15 |
| Control | 229 | 2320 | 1373 | 1.69 | Sym  | 3213 | 2312 | 1.39 |
| Control | 230 | 2495 | 857  | 2.91 | Asym | 2212 | 395  | 5.6  |
| Control | 231 | 2820 | 1986 | 1.42 | Sym  | 2918 | 1667 | 1.75 |
| Control | 232 | 2168 | 1153 | 1.88 | Sym  | 2715 | 2207 | 1.23 |
| Control | 233 | 3037 | 1934 | 1.57 | Sym  | 2665 | 2835 | 0.94 |
| Control | 234 | 2009 | 1339 | 1.5  | Sym  | 2440 | 1506 | 1.62 |
| Control | 235 | 3426 | 4230 | 0.81 | Sym  | 2670 | 1679 | 1.59 |
| Control | 236 | 2566 | 1614 | 1.59 | Sym  | 2231 | 1594 | 1.4  |
| Control | 237 | 2997 | 556  | 5.39 | Asym | 3110 | 772  | 4.03 |
| Control | 238 | 2660 | 1446 | 1.84 | Sym  | 3334 | 3509 | 0.95 |
| Control | 239 | 2638 | 683  | 3.86 | Asym | 2811 | 1094 | 2.57 |
| Control | 240 | 2150 | 395  | 5.44 | Asym | 3126 | 936  | 3.34 |
| Control | 241 | 3364 | 2027 | 1.66 | Sym  | 3001 | 2480 | 1.21 |
| Control | 242 | 2667 | 1515 | 1.76 | Sym  | 2559 | 2285 | 1.12 |
| Control | 243 | 3298 | 2919 | 1.13 | Sym  | 3365 | 3365 | 1    |
| Control | 244 | 2260 | 2690 | 0.84 | Sym  | 2916 | 3276 | 0.89 |
| Control | 245 | 2897 | 2455 | 1.18 | Sym  | 3313 | 1984 | 1.67 |
| Control | 246 | 2073 | 1607 | 1.29 | Sym  | 2836 | 2383 | 1.19 |
| Control | 247 | 2360 | 1333 | 1.77 | Sym  | 2273 | 1270 | 1.79 |
| Control | 248 | 2429 | 1883 | 1.29 | Sym  | 2703 | 2291 | 1.18 |
| Control | 249 | 3389 | 3987 | 0.85 | Sym  | 2230 | 1385 | 1.61 |
| Control | 250 | 2553 | 1576 | 1.62 | Sym  | 2709 | 3187 | 0.85 |
| Control | 251 | 1828 | 1164 | 1.57 | Sym  | 2951 | 3279 | 0.9  |
| Control | 252 | 2672 | 2323 | 1.15 | Sym  | 2055 | 1117 | 1.84 |
| Control | 253 | 2069 | 1629 | 1.27 | Sym  | 3220 | 2776 | 1.16 |

|         |     |      |      |      |      |      |      |      |
|---------|-----|------|------|------|------|------|------|------|
| Control | 255 | 2892 | 2537 | 1.14 | Sym  | 3196 | 2577 | 1.24 |
| Control | 256 | 2404 | 1541 | 1.56 | Sym  | 3332 | 3744 | 0.89 |
| Control | 257 | 3083 | 1742 | 1.77 | Sym  | 2879 | 2440 | 1.18 |
| Control | 258 | 2002 | 1251 | 1.6  | Sym  | 2688 | 1659 | 1.62 |
| Control | 259 | 2150 | 1352 | 1.59 | Sym  | 2924 | 2565 | 1.14 |
| Control | 260 | 2417 | 2120 | 1.14 | Sym  | 3082 | 2506 | 1.23 |
| Control | 261 | 2342 | 1354 | 1.73 | Sym  | 1854 | 991  | 1.87 |
| Control | 262 | 3314 | 2785 | 1.19 | Sym  | 2436 | 2486 | 0.98 |
| Control | 263 | 2956 | 2384 | 1.24 | Sym  | 2642 | 1592 | 1.66 |
| Control | 264 | 2960 | 2387 | 1.24 | Sym  | 2946 | 1796 | 1.64 |
| Control | 265 | 3076 | 533  | 5.77 | Asym | 3124 | 737  | 4.24 |
| Control | 266 | 2338 | 1635 | 1.43 | Sym  | 2100 | 1409 | 1.49 |
| Control | 267 | 3361 | 3001 | 1.12 | Sym  | 3313 | 4040 | 0.82 |
| Control | 268 | 3473 | 2517 | 1.38 | Sym  | 3283 | 2132 | 1.54 |
| Control | 269 | 2617 | 2566 | 1.02 | Sym  | 2698 | 1861 | 1.45 |
| Control | 270 | 2879 | 1745 | 1.65 | Sym  | 2872 | 1784 | 1.61 |
| Control | 271 | 3399 | 2073 | 1.64 | Sym  | 3386 | 2822 | 1.2  |
| Control | 272 | 2132 | 820  | 2.6  | Asym | 3422 | 1209 | 2.83 |
| Control | 273 | 2083 | 525  | 3.97 | Asym | 2509 | 532  | 4.72 |
| Control | 274 | 2327 | 2424 | 0.96 | Sym  | 3498 | 2070 | 1.69 |
| Control | 275 | 2877 | 1673 | 1.72 | Sym  | 2563 | 3204 | 0.8  |
| Control | 276 | 2144 | 2023 | 1.06 | Sym  | 2963 | 1743 | 1.7  |
| Control | 277 | 2416 | 1430 | 1.69 | Sym  | 2427 | 1618 | 1.5  |
| Control | 278 | 3477 | 2133 | 1.63 | Sym  | 2498 | 2839 | 0.88 |
| Control | 279 | 2425 | 1585 | 1.53 | Sym  | 1980 | 1833 | 1.08 |
| Control | 280 | 3076 | 2875 | 1.07 | Sym  | 2171 | 1227 | 1.77 |
| Control | 281 | 2552 | 1501 | 1.7  | Sym  | 2376 | 1662 | 1.43 |
| Control | 282 | 3356 | 2010 | 1.67 | Sym  | 2903 | 1910 | 1.52 |
| Control | 283 | 2761 | 3210 | 0.86 | Sym  | 1894 | 1857 | 1.02 |
| Control | 284 | 3015 | 2201 | 1.37 | Sym  | 2804 | 1575 | 1.78 |
| Control | 285 | 3165 | 3768 | 0.84 | Sym  | 3162 | 1786 | 1.77 |
| Control | 286 | 2263 | 1451 | 1.56 | Sym  | 3348 | 2499 | 1.34 |
| Control | 287 | 2498 | 1373 | 1.82 | Sym  | 2263 | 2219 | 1.02 |
| Control | 288 | 2396 | 2178 | 1.1  | Sym  | 2040 | 1594 | 1.28 |
| Control | 289 | 2083 | 1894 | 1.1  | Sym  | 2142 | 1508 | 1.42 |
| Control | 290 | 1810 | 1885 | 0.96 | Sym  | 3233 | 2141 | 1.51 |
| Control | 291 | 3446 | 3829 | 0.9  | Sym  | 2438 | 2158 | 1.13 |
| Control | 292 | 2322 | 1814 | 1.28 | Sym  | 3091 | 3434 | 0.9  |
| Control | 293 | 3098 | 1822 | 1.7  | Sym  | 3334 | 1792 | 1.86 |
| Control | 294 | 2916 | 1576 | 1.85 | Sym  | 2674 | 2815 | 0.95 |
| Control | 295 | 3419 | 2085 | 1.64 | Sym  | 2575 | 1384 | 1.86 |
| Control | 296 | 2566 | 2086 | 1.23 | Sym  | 3107 | 1661 | 1.87 |
| Control | 297 | 2845 | 2933 | 0.97 | Sym  | 1815 | 1911 | 0.95 |
| Control | 298 | 2687 | 2020 | 1.33 | Sym  | 2853 | 3206 | 0.89 |
| Control | 299 | 3386 | 3164 | 1.07 | Sym  | 1983 | 1469 | 1.35 |
| Control | 300 | 2431 | 1677 | 1.45 | Sym  | 2566 | 1974 | 1.3  |
| Control | 301 | 3262 | 1063 | 3.07 | Asym | 3370 | 653  | 5.16 |
| Control | 302 | 2820 | 2029 | 1.39 | Sym  | 2061 | 1184 | 1.74 |
| Control | 303 | 3327 | 3577 | 0.93 | Sym  | 2181 | 1212 | 1.8  |
| Control | 304 | 1885 | 1156 | 1.63 | Sym  | 2261 | 1528 | 1.48 |
| Control | 305 | 2641 | 2257 | 1.17 | Sym  | 3390 | 4084 | 0.83 |
| Control | 306 | 2258 | 1221 | 1.85 | Sym  | 3306 | 3149 | 1.05 |
| Control | 307 | 2344 | 2232 | 1.05 | Sym  | 2084 | 2063 | 1.01 |
| Control | 308 | 2023 | 1556 | 1.3  | Sym  | 3431 | 2287 | 1.5  |
| Control | 309 | 3254 | 2141 | 1.52 | Sym  | 1833 | 1255 | 1.46 |
| Control | 310 | 3076 | 1853 | 1.66 | Sym  | 2666 | 2279 | 1.17 |
| Control | 311 | 3474 | 2316 | 1.5  | Sym  | 2443 | 2395 | 1.02 |
| Control | 312 | 1932 | 455  | 4.25 | Asym | 3410 | 988  | 3.45 |
| Control | 313 | 2316 | 1379 | 1.68 | Sym  | 2149 | 1990 | 1.08 |
| Control | 314 | 3233 | 1234 | 2.62 | Asym | 1949 | 725  | 2.69 |
| Control | 315 | 2668 | 3102 | 0.86 | Sym  | 2959 | 2845 | 1.04 |
| Control | 316 | 2420 | 1862 | 1.3  | Sym  | 2826 | 3405 | 0.83 |
| Control | 317 | 1859 | 1419 | 1.31 | Sym  | 2425 | 1386 | 1.75 |

|         |     |      |      |      |      |      |      |      |
|---------|-----|------|------|------|------|------|------|------|
| Control | 319 | 2576 | 1198 | 2.15 | Asym | 2244 | 618  | 3.63 |
| Control | 320 | 2010 | 1489 | 1.35 | Sym  | 2129 | 2476 | 0.86 |
| Control | 321 | 2216 | 1385 | 1.6  | Sym  | 2879 | 2571 | 1.12 |
| Control | 322 | 2513 | 1323 | 1.9  | Sym  | 2498 | 2715 | 0.92 |
| Control | 323 | 2014 | 1637 | 1.23 | Sym  | 2880 | 1714 | 1.68 |
| Control | 324 | 2015 | 1113 | 1.81 | Sym  | 2811 | 3470 | 0.81 |
| Control | 325 | 1893 | 2309 | 0.82 | Sym  | 3465 | 2139 | 1.62 |
| Control | 326 | 2165 | 2005 | 1.08 | Sym  | 1839 | 1372 | 1.34 |
| Control | 327 | 2095 | 1301 | 1.61 | Sym  | 3332 | 1861 | 1.79 |
| Control | 328 | 2162 | 1272 | 1.7  | Sym  | 3198 | 2518 | 1.27 |
| Control | 329 | 2183 | 2119 | 1.03 | Sym  | 2214 | 1295 | 1.71 |
| Control | 330 | 1909 | 2194 | 0.87 | Sym  | 1881 | 1529 | 1.23 |
| Control | 331 | 3166 | 562  | 5.63 | Asym | 3410 | 726  | 4.7  |
| Control | 332 | 2156 | 1597 | 1.35 | Sym  | 3268 | 3890 | 0.84 |
| Control | 333 | 2488 | 2023 | 1.23 | Sym  | 2019 | 1063 | 1.9  |
| Control | 334 | 2322 | 2580 | 0.9  | Sym  | 1842 | 1007 | 1.83 |
| Control | 335 | 2747 | 668  | 4.11 | Asym | 2473 | 693  | 3.57 |
| Control | 336 | 2280 | 2151 | 1.06 | Sym  | 2149 | 2362 | 0.91 |
| Control | 337 | 2030 | 1678 | 1.21 | Sym  | 2161 | 1431 | 1.51 |
| Control | 338 | 3380 | 2364 | 1.43 | Sym  | 3140 | 1847 | 1.7  |
| Control | 339 | 2784 | 2125 | 1.31 | Sym  | 2291 | 1372 | 1.67 |
| Control | 340 | 3183 | 3701 | 0.86 | Sym  | 2666 | 1578 | 1.69 |
| Control | 341 | 3017 | 3725 | 0.81 | Sym  | 1947 | 1264 | 1.54 |
| Control | 342 | 2471 | 1350 | 1.83 | Sym  | 2547 | 1481 | 1.72 |
| Control | 343 | 2746 | 2233 | 1.23 | Sym  | 3378 | 2559 | 1.32 |
| Control | 344 | 2516 | 2029 | 1.24 | Sym  | 1881 | 2266 | 0.83 |
| Control | 345 | 2908 | 1616 | 1.8  | Sym  | 3113 | 2306 | 1.35 |
| Control | 346 | 1937 | 2176 | 0.89 | Sym  | 2413 | 1319 | 1.83 |
| Control | 347 | 3162 | 3720 | 0.85 | Sym  | 2398 | 2050 | 1.17 |
| Control | 348 | 2344 | 1605 | 1.46 | Sym  | 3215 | 2115 | 1.52 |
| Control | 349 | 2471 | 2149 | 1.15 | Sym  | 2066 | 1812 | 1.14 |
| Control | 350 | 2571 | 2521 | 1.02 | Sym  | 1983 | 1819 | 1.09 |
| Control | 351 | 2697 | 3330 | 0.81 | Sym  | 2056 | 1996 | 1.03 |
| Control | 352 | 2053 | 1755 | 1.17 | Sym  | 3283 | 4004 | 0.82 |
| Control | 353 | 2996 | 1628 | 1.84 | Sym  | 1842 | 1899 | 0.97 |
| Control | 354 | 3036 | 1755 | 1.73 | Sym  | 2893 | 1819 | 1.59 |
| Control | 355 | 2837 | 2101 | 1.35 | Sym  | 2678 | 1728 | 1.55 |
| Control | 356 | 3205 | 1978 | 1.62 | Sym  | 2768 | 1883 | 1.47 |
| Control | 357 | 3371 | 2443 | 1.38 | Sym  | 3209 | 2244 | 1.43 |
| Control | 358 | 3298 | 2407 | 1.37 | Sym  | 2019 | 2103 | 0.96 |
| Control | 359 | 2754 | 1765 | 1.56 | Sym  | 2992 | 1870 | 1.6  |
| Control | 360 | 2186 | 1401 | 1.56 | Sym  | 2445 | 1287 | 1.9  |
| Control | 361 | 2144 | 1147 | 1.87 | Sym  | 1947 | 1401 | 1.39 |
| Control | 362 | 2484 | 2435 | 1.02 | Sym  | 2418 | 1406 | 1.72 |
| Control | 363 | 3332 | 1841 | 1.81 | Sym  | 1988 | 1227 | 1.62 |
| Control | 364 | 1886 | 1179 | 1.6  | Sym  | 2032 | 1441 | 1.41 |
| Control | 365 | 1856 | 1417 | 1.31 | Sym  | 3276 | 3377 | 0.97 |
| Control | 366 | 2556 | 1618 | 1.58 | Sym  | 2247 | 1469 | 1.53 |
| Control | 367 | 2579 | 1803 | 1.43 | Sym  | 2197 | 2154 | 1.02 |
| Control | 368 | 3458 | 4217 | 0.82 | Sym  | 2651 | 1828 | 1.45 |
| Control | 369 | 3305 | 1333 | 2.48 | Asym | 2929 | 1131 | 2.59 |
| Control | 370 | 2726 | 510  | 5.35 | Asym | 2767 | 650  | 4.26 |
| Control | 371 | 2213 | 661  | 3.35 | Asym | 3061 | 1451 | 2.11 |
| Control | 372 | 2933 | 1051 | 2.79 | Asym | 2628 | 597  | 4.4  |
| Control | 373 | 3473 | 3308 | 1.05 | Sym  | 2301 | 1224 | 1.88 |
| Control | 374 | 2678 | 1927 | 1.39 | Sym  | 2203 | 1412 | 1.56 |
| Control | 375 | 3266 | 1856 | 1.76 | Sym  | 3481 | 3703 | 0.94 |
| Control | 376 | 3290 | 1437 | 2.29 | Asym | 1802 | 301  | 5.98 |
| Control | 377 | 3059 | 1924 | 1.59 | Sym  | 2432 | 1632 | 1.49 |
| Control | 378 | 2314 | 1338 | 1.73 | Sym  | 3074 | 1971 | 1.56 |
| Control | 379 | 2988 | 2165 | 1.38 | Sym  | 2807 | 2095 | 1.34 |
| Control | 380 | 1918 | 1341 | 1.43 | Sym  | 1846 | 1199 | 1.54 |
| Control | 381 | 3269 | 1816 | 1.8  | Sym  | 3045 | 2436 | 1.25 |

|         |     |      |      |      |      |      |      |      |
|---------|-----|------|------|------|------|------|------|------|
| Control | 383 | 2007 | 2113 | 0.95 | Sym  | 2810 | 2266 | 1.24 |
| Control | 384 | 2972 | 1143 | 2.6  | Asym | 2273 | 706  | 3.22 |
| Control | 385 | 2997 | 1656 | 1.81 | Sym  | 2318 | 2016 | 1.15 |
| Control | 386 | 2736 | 2682 | 1.02 | Sym  | 3304 | 3059 | 1.08 |
| Control | 387 | 3147 | 3211 | 0.98 | Sym  | 2632 | 1462 | 1.8  |
| Control | 388 | 3278 | 2062 | 1.59 | Sym  | 2088 | 2088 | 1    |
| Control | 389 | 2709 | 2556 | 1.06 | Sym  | 3485 | 2026 | 1.72 |
| Control | 390 | 2462 | 1431 | 1.72 | Sym  | 1907 | 2192 | 0.87 |
| Control | 391 | 2014 | 2238 | 0.9  | Sym  | 2170 | 1206 | 1.8  |
| Control | 392 | 2344 | 2894 | 0.81 | Sym  | 2953 | 1834 | 1.61 |
| Control | 393 | 2276 | 1423 | 1.6  | Sym  | 2572 | 1905 | 1.35 |
| Control | 394 | 3186 | 1780 | 1.79 | Sym  | 2634 | 1678 | 1.57 |
| Control | 395 | 2460 | 1344 | 1.83 | Sym  | 1913 | 1396 | 1.37 |
| Control | 396 | 3296 | 2273 | 1.45 | Sym  | 2342 | 1661 | 1.41 |
| Control | 397 | 2266 | 2079 | 1.09 | Sym  | 2320 | 1441 | 1.61 |
| Control | 398 | 2509 | 2302 | 1.09 | Sym  | 1856 | 1395 | 1.33 |
| Control | 399 | 3045 | 2719 | 1.12 | Sym  | 2310 | 1242 | 1.86 |
| Control | 400 | 2894 | 1929 | 1.5  | Sym  | 2547 | 1781 | 1.43 |

| Group   | Pair cell No. | BrdU intensive value |             | Relative value | Pair cell type |
|---------|---------------|----------------------|-------------|----------------|----------------|
|         |               | First cell           | Second cell |                |                |
| SOX9 KO | 1             | 2263                 | 2076        | 1.09           | Sym            |
| SOX9 KO | 2             | 2265                 | 1407        | 1.61           | Sym            |
| SOX9 KO | 3             | 1995                 | 759         | 2.63           | Asym           |
| SOX9 KO | 4             | 2353                 | 2064        | 1.14           | Sym            |
| SOX9 KO | 5             | 3452                 | 666         | 5.18           | Asym           |
| SOX9 KO | 6             | 2265                 | 1245        | 1.82           | Sym            |
| SOX9 KO | 7             | 2288                 | 1476        | 1.55           | Sym            |
| SOX9 KO | 8             | 3371                 | 2019        | 1.67           | Sym            |
| SOX9 KO | 9             | 2418                 | 526         | 4.6            | Asym           |
| SOX9 KO | 10            | 2742                 | 1490        | 1.84           | Sym            |
| SOX9 KO | 11            | 2873                 | 1763        | 1.63           | Sym            |
| SOX9 KO | 12            | 1806                 | 1196        | 1.51           | Sym            |
| SOX9 KO | 13            | 2487                 | 501         | 4.96           | Asym           |
| SOX9 KO | 14            | 2063                 | 1563        | 1.32           | Sym            |
| SOX9 KO | 15            | 3353                 | 1363        | 2.46           | Asym           |
| SOX9 KO | 16            | 2928                 | 2420        | 1.21           | Sym            |
| SOX9 KO | 17            | 3458                 | 3262        | 1.06           | Sym            |
| SOX9 KO | 18            | 3455                 | 1125        | 3.07           | Asym           |
| SOX9 KO | 19            | 3196                 | 701         | 4.56           | Asym           |
| SOX9 KO | 20            | 3473                 | 1219        | 2.85           | Asym           |
| SOX9 KO | 21            | 2008                 | 1746        | 1.15           | Sym            |
| SOX9 KO | 22            | 2674                 | 1267        | 2.11           | Asym           |
| SOX9 KO | 23            | 2940                 | 955         | 3.08           | Asym           |
| SOX9 KO | 24            | 1985                 | 1873        | 1.06           | Sym            |
| SOX9 KO | 25            | 3159                 | 532         | 5.94           | Asym           |
| SOX9 KO | 26            | 1919                 | 1654        | 1.16           | Sym            |
| SOX9 KO | 27            | 1944                 | 1690        | 1.15           | Sym            |
| SOX9 KO | 28            | 2225                 | 2781        | 0.8            | Sym            |
| SOX9 KO | 29            | 2720                 | 904         | 3.01           | Asym           |
| SOX9 KO | 30            | 3128                 | 1819        | 1.72           | Sym            |
| SOX9 KO | 31            | 2147                 | 1376        | 1.56           | Sym            |
| SOX9 KO | 32            | 2365                 | 2093        | 1.13           | Sym            |
| SOX9 KO | 33            | 2220                 | 376         | 5.91           | Asym           |
| SOX9 KO | 34            | 2061                 | 790         | 2.61           | Asym           |
| SOX9 KO | 35            | 1951                 | 1742        | 1.12           | Sym            |
| SOX9 KO | 36            | 2186                 | 694         | 3.15           | Asym           |
| SOX9 KO | 37            | 2622                 | 3085        | 0.85           | Sym            |
| SOX9 KO | 38            | 2117                 | 590         | 3.59           | Asym           |
| SOX9 KO | 39            | 3205                 | 2995        | 1.07           | Sym            |
| SOX9 KO | 40            | 2308                 | 1649        | 1.4            | Sym            |
| SOX9 KO | 41            | 2224                 | 530         | 4.2            | Asym           |
| SOX9 KO | 42            | 2488                 | 1693        | 1.47           | Sym            |
| SOX9 KO | 43            | 3354                 | 651         | 5.15           | Asym           |
| SOX9 KO | 44            | 3237                 | 2632        | 1.23           | Sym            |
| SOX9 KO | 45            | 2436                 | 768         | 3.17           | Asym           |
| SOX9 KO | 46            | 3346                 | 707         | 4.73           | Asym           |
| SOX9 KO | 47            | 2514                 | 567         | 4.43           | Asym           |
| SOX9 KO | 48            | 2516                 | 2374        | 1.06           | Sym            |
| SOX9 KO | 49            | 2103                 | 398         | 5.29           | Asym           |
| SOX9 KO | 50            | 2724                 | 2961        | 0.92           | Sym            |
| SOX9 KO | 51            | 2782                 | 2226        | 1.25           | Sym            |
| SOX9 KO | 52            | 3396                 | 665         | 5.11           | Asym           |
| SOX9 KO | 53            | 2333                 | 1356        | 1.72           | Sym            |
| SOX9 KO | 54            | 3255                 | 781         | 4.17           | Asym           |
| SOX9 KO | 55            | 2523                 | 695         | 3.63           | Asym           |

|         |     |      |      |      |      |
|---------|-----|------|------|------|------|
| SOX9 KO | 57  | 3210 | 1466 | 2.19 | Asym |
| SOX9 KO | 58  | 2101 | 770  | 2.73 | Asym |
| SOX9 KO | 59  | 1904 | 1849 | 1.03 | Sym  |
| SOX9 KO | 60  | 3319 | 871  | 3.81 | Asym |
| SOX9 KO | 61  | 2375 | 913  | 2.6  | Asym |
| SOX9 KO | 62  | 3177 | 2011 | 1.58 | Sym  |
| SOX9 KO | 63  | 3292 | 3292 | 1    | Sym  |
| SOX9 KO | 64  | 1910 | 1891 | 1.01 | Sym  |
| SOX9 KO | 65  | 2109 | 359  | 5.88 | Asym |
| SOX9 KO | 66  | 2125 | 631  | 3.37 | Asym |
| SOX9 KO | 67  | 2767 | 1480 | 1.87 | Sym  |
| SOX9 KO | 68  | 2733 | 759  | 3.6  | Asym |
| SOX9 KO | 69  | 2268 | 417  | 5.44 | Asym |
| SOX9 KO | 70  | 3011 | 625  | 4.82 | Asym |
| SOX9 KO | 71  | 2791 | 593  | 4.71 | Asym |
| SOX9 KO | 72  | 3062 | 1845 | 1.66 | Sym  |
| SOX9 KO | 73  | 3156 | 2869 | 1.1  | Sym  |
| SOX9 KO | 74  | 2811 | 2627 | 1.07 | Sym  |
| SOX9 KO | 75  | 3306 | 568  | 5.82 | Asym |
| SOX9 KO | 76  | 2699 | 2966 | 0.91 | Sym  |
| SOX9 KO | 77  | 2795 | 1616 | 1.73 | Sym  |
| SOX9 KO | 78  | 2511 | 457  | 5.49 | Asym |
| SOX9 KO | 79  | 2273 | 951  | 2.39 | Asym |
| SOX9 KO | 80  | 3234 | 2327 | 1.39 | Sym  |
| SOX9 KO | 81  | 2113 | 2401 | 0.88 | Sym  |
| SOX9 KO | 82  | 2986 | 627  | 4.76 | Asym |
| SOX9 KO | 83  | 2516 | 669  | 3.76 | Asym |
| SOX9 KO | 84  | 2486 | 1471 | 1.69 | Sym  |
| SOX9 KO | 85  | 3359 | 1030 | 3.26 | Asym |
| SOX9 KO | 86  | 2237 | 417  | 5.36 | Asym |
| SOX9 KO | 87  | 2214 | 788  | 2.81 | Asym |
| SOX9 KO | 88  | 2936 | 2159 | 1.36 | Sym  |
| SOX9 KO | 89  | 1958 | 715  | 2.74 | Asym |
| SOX9 KO | 90  | 2105 | 1108 | 1.9  | Sym  |
| SOX9 KO | 91  | 3321 | 554  | 5.99 | Asym |
| SOX9 KO | 92  | 2110 | 645  | 3.27 | Asym |
| SOX9 KO | 93  | 2843 | 512  | 5.55 | Asym |
| SOX9 KO | 94  | 2990 | 1027 | 2.91 | Asym |
| SOX9 KO | 95  | 2253 | 1959 | 1.15 | Sym  |
| SOX9 KO | 96  | 3102 | 526  | 5.9  | Asym |
| SOX9 KO | 97  | 2414 | 757  | 3.19 | Asym |
| SOX9 KO | 98  | 3038 | 1362 | 2.23 | Asym |
| SOX9 KO | 99  | 3017 | 2453 | 1.23 | Sym  |
| SOX9 KO | 100 | 2722 | 1047 | 2.6  | Asym |
| SOX9 KO | 101 | 2837 | 1659 | 1.71 | Sym  |
| SOX9 KO | 102 | 3300 | 2025 | 1.63 | Sym  |
| SOX9 KO | 103 | 3488 | 599  | 5.82 | Asym |
| SOX9 KO | 104 | 1932 | 1039 | 1.86 | Sym  |
| SOX9 KO | 105 | 3082 | 822  | 3.75 | Asym |
| SOX9 KO | 106 | 3275 | 565  | 5.8  | Asym |
| SOX9 KO | 107 | 2304 | 2375 | 0.97 | Sym  |
| SOX9 KO | 108 | 3156 | 3035 | 1.04 | Sym  |
| SOX9 KO | 109 | 2036 | 693  | 2.94 | Asym |
| SOX9 KO | 110 | 3399 | 766  | 4.44 | Asym |
| SOX9 KO | 111 | 2125 | 372  | 5.71 | Asym |
| SOX9 KO | 112 | 2239 | 550  | 4.07 | Asym |
| SOX9 KO | 113 | 3275 | 769  | 4.26 | Asym |

|         |     |      |      |      |      |
|---------|-----|------|------|------|------|
| SOX9 KO | 115 | 2474 | 680  | 3.64 | Asym |
| SOX9 KO | 116 | 3327 | 1540 | 2.16 | Asym |
| SOX9 KO | 117 | 3463 | 633  | 5.47 | Asym |
| SOX9 KO | 118 | 3425 | 780  | 4.39 | Asym |
| SOX9 KO | 119 | 2932 | 726  | 4.04 | Asym |
| SOX9 KO | 120 | 1875 | 1187 | 1.58 | Sym  |
| SOX9 KO | 121 | 3089 | 767  | 4.03 | Asym |
| SOX9 KO | 122 | 3447 | 3105 | 1.11 | Sym  |
| SOX9 KO | 123 | 2461 | 2895 | 0.85 | Sym  |
| SOX9 KO | 124 | 2823 | 1148 | 2.46 | Asym |
| SOX9 KO | 125 | 2499 | 497  | 5.03 | Asym |
| SOX9 KO | 126 | 2616 | 659  | 3.97 | Asym |
| SOX9 KO | 127 | 3416 | 3077 | 1.11 | Sym  |
| SOX9 KO | 128 | 2730 | 688  | 3.97 | Asym |
| SOX9 KO | 129 | 2155 | 2535 | 0.85 | Sym  |
| SOX9 KO | 130 | 2438 | 799  | 3.05 | Asym |
| SOX9 KO | 131 | 2618 | 3009 | 0.87 | Sym  |
| SOX9 KO | 132 | 2193 | 1329 | 1.65 | Sym  |
| SOX9 KO | 133 | 1901 | 799  | 2.38 | Asym |
| SOX9 KO | 134 | 2085 | 891  | 2.34 | Asym |
| SOX9 KO | 135 | 2775 | 658  | 4.22 | Asym |
| SOX9 KO | 136 | 3284 | 693  | 4.74 | Asym |
| SOX9 KO | 137 | 2323 | 1518 | 1.53 | Sym  |
| SOX9 KO | 138 | 1965 | 1665 | 1.18 | Sym  |
| SOX9 KO | 139 | 1817 | 318  | 5.72 | Asym |
| SOX9 KO | 140 | 2786 | 1601 | 1.74 | Sym  |
| SOX9 KO | 141 | 3248 | 700  | 4.64 | Asym |
| SOX9 KO | 142 | 2140 | 1529 | 1.4  | Sym  |
| SOX9 KO | 143 | 2682 | 491  | 5.46 | Asym |
| SOX9 KO | 144 | 3174 | 820  | 3.87 | Asym |
| SOX9 KO | 145 | 2511 | 734  | 3.42 | Asym |
| SOX9 KO | 146 | 2023 | 467  | 4.33 | Asym |
| SOX9 KO | 147 | 2787 | 555  | 5.02 | Asym |
| SOX9 KO | 148 | 1909 | 654  | 2.92 | Asym |
| SOX9 KO | 149 | 2215 | 441  | 5.02 | Asym |
| SOX9 KO | 150 | 2484 | 1645 | 1.51 | Sym  |
| SOX9 KO | 151 | 2320 | 1441 | 1.61 | Sym  |
| SOX9 KO | 152 | 2294 | 2868 | 0.8  | Sym  |
| SOX9 KO | 153 | 2368 | 437  | 5.42 | Asym |
| SOX9 KO | 154 | 2523 | 1442 | 1.75 | Sym  |
| SOX9 KO | 155 | 2212 | 737  | 3    | Asym |
| SOX9 KO | 156 | 2976 | 2420 | 1.23 | Sym  |
| SOX9 KO | 157 | 1908 | 717  | 2.66 | Asym |
| SOX9 KO | 158 | 2558 | 1968 | 1.3  | Sym  |
| SOX9 KO | 159 | 2340 | 391  | 5.98 | Asym |
| SOX9 KO | 160 | 2319 | 2577 | 0.9  | Sym  |
| SOX9 KO | 161 | 2815 | 2289 | 1.23 | Sym  |
| SOX9 KO | 162 | 2866 | 589  | 4.87 | Asym |
| SOX9 KO | 163 | 2595 | 595  | 4.36 | Asym |
| SOX9 KO | 164 | 3258 | 610  | 5.34 | Asym |
| SOX9 KO | 165 | 2934 | 3121 | 0.94 | Sym  |
| SOX9 KO | 166 | 2950 | 552  | 5.34 | Asym |
| SOX9 KO | 167 | 2552 | 484  | 5.27 | Asym |
| SOX9 KO | 168 | 2322 | 2233 | 1.04 | Sym  |
| SOX9 KO | 169 | 2024 | 556  | 3.64 | Asym |
| SOX9 KO | 170 | 2270 | 417  | 5.44 | Asym |
| SOX9 KO | 171 | 2948 | 1902 | 1.55 | Sym  |



|         |     |      |      |      |      |
|---------|-----|------|------|------|------|
| SOX9 KO | 173 | 2187 | 464  | 4.71 | Asym |
| SOX9 KO | 174 | 2252 | 1586 | 1.42 | Sym  |
| SOX9 KO | 175 | 3338 | 1087 | 3.07 | Asym |
| SOX9 KO | 176 | 2095 | 1455 | 1.44 | Sym  |
| SOX9 KO | 177 | 2462 | 742  | 3.32 | Asym |
| SOX9 KO | 178 | 2492 | 427  | 5.84 | Asym |
| SOX9 KO | 179 | 1928 | 1236 | 1.56 | Sym  |
| SOX9 KO | 180 | 2261 | 1222 | 1.85 | Sym  |
| SOX9 KO | 181 | 1924 | 324  | 5.94 | Asym |
| SOX9 KO | 182 | 2382 | 1361 | 1.75 | Sym  |
| SOX9 KO | 183 | 2923 | 3177 | 0.92 | Sym  |
| SOX9 KO | 184 | 3106 | 1991 | 1.56 | Sym  |
| SOX9 KO | 185 | 2613 | 622  | 4.2  | Asym |
| SOX9 KO | 186 | 1886 | 1266 | 1.49 | Sym  |
| SOX9 KO | 187 | 2240 | 1931 | 1.16 | Sym  |
| SOX9 KO | 188 | 2787 | 2034 | 1.37 | Sym  |
| SOX9 KO | 189 | 2118 | 507  | 4.18 | Asym |
| SOX9 KO | 190 | 2772 | 2615 | 1.06 | Sym  |
| SOX9 KO | 191 | 2447 | 486  | 5.04 | Asym |
| SOX9 KO | 192 | 1946 | 442  | 4.4  | Asym |
| SOX9 KO | 193 | 3140 | 791  | 3.97 | Asym |
| SOX9 KO | 194 | 2751 | 533  | 5.16 | Asym |
| SOX9 KO | 195 | 2295 | 2700 | 0.85 | Sym  |
| SOX9 KO | 196 | 2135 | 1294 | 1.65 | Sym  |
| SOX9 KO | 197 | 2369 | 705  | 3.36 | Asym |
| SOX9 KO | 198 | 3167 | 3519 | 0.9  | Sym  |
| SOX9 KO | 199 | 3208 | 775  | 4.14 | Asym |
| SOX9 KO | 200 | 2306 | 546  | 4.22 | Asym |
| SOX9 KO | 201 | 2049 | 2134 | 0.96 | Sym  |
| SOX9 KO | 202 | 3093 | 1875 | 1.65 | Sym  |
| SOX9 KO | 203 | 1954 | 426  | 4.59 | Asym |
| SOX9 KO | 204 | 2201 | 548  | 4.02 | Asym |
| SOX9 KO | 205 | 3143 | 2709 | 1.16 | Sym  |
| SOX9 KO | 206 | 2643 | 2566 | 1.03 | Sym  |
| SOX9 KO | 207 | 3496 | 777  | 4.5  | Asym |
| SOX9 KO | 208 | 2048 | 383  | 5.35 | Asym |
| SOX9 KO | 209 | 2052 | 2160 | 0.95 | Sym  |
| SOX9 KO | 210 | 3326 | 2004 | 1.66 | Sym  |
| SOX9 KO | 211 | 1924 | 445  | 4.32 | Asym |
| SOX9 KO | 212 | 2673 | 1869 | 1.43 | Sym  |
| SOX9 KO | 213 | 1967 | 594  | 3.31 | Asym |
| SOX9 KO | 214 | 2556 | 547  | 4.67 | Asym |
| SOX9 KO | 215 | 2180 | 586  | 3.72 | Asym |
| SOX9 KO | 216 | 2160 | 391  | 5.53 | Asym |
| SOX9 KO | 217 | 2531 | 616  | 4.11 | Asym |
| SOX9 KO | 218 | 1828 | 1374 | 1.33 | Sym  |
| SOX9 KO | 219 | 3491 | 1283 | 2.72 | Asym |
| SOX9 KO | 220 | 2611 | 1718 | 1.52 | Sym  |
| SOX9 KO | 221 | 2310 | 481  | 4.8  | Asym |
| SOX9 KO | 222 | 2125 | 515  | 4.13 | Asym |
| SOX9 KO | 223 | 2941 | 2163 | 1.36 | Sym  |
| SOX9 KO | 224 | 3124 | 3124 | 1    | Sym  |
| SOX9 KO | 225 | 2208 | 818  | 2.7  | Asym |
| SOX9 KO | 226 | 2930 | 2738 | 1.07 | Sym  |
| SOX9 KO | 227 | 2566 | 544  | 4.72 | Asym |
| SOX9 KO | 228 | 2885 | 666  | 4.33 | Asym |
| SOX9 KO | 229 | 2854 | 2230 | 1.28 | Sym  |

|         |     |      |      |      |      |
|---------|-----|------|------|------|------|
| SOX9 KO | 231 | 3131 | 705  | 4.44 | Asym |
| SOX9 KO | 232 | 2886 | 839  | 3.44 | Asym |
| SOX9 KO | 233 | 3249 | 1177 | 2.76 | Asym |
| SOX9 KO | 234 | 3148 | 645  | 4.88 | Asym |
| SOX9 KO | 235 | 2970 | 692  | 4.29 | Asym |
| SOX9 KO | 236 | 3459 | 3530 | 0.98 | Sym  |
| SOX9 KO | 237 | 2331 | 1260 | 1.85 | Sym  |
| SOX9 KO | 238 | 2847 | 1791 | 1.59 | Sym  |
| SOX9 KO | 239 | 3477 | 2827 | 1.23 | Sym  |
| SOX9 KO | 240 | 2888 | 2256 | 1.28 | Sym  |
| SOX9 KO | 241 | 1824 | 335  | 5.45 | Asym |
| SOX9 KO | 242 | 3367 | 1115 | 3.02 | Asym |
| SOX9 KO | 243 | 3371 | 590  | 5.71 | Asym |
| SOX9 KO | 244 | 3203 | 589  | 5.44 | Asym |
| SOX9 KO | 245 | 2054 | 849  | 2.42 | Asym |
| SOX9 KO | 246 | 1930 | 326  | 5.92 | Asym |
| SOX9 KO | 247 | 2745 | 803  | 3.42 | Asym |
| SOX9 KO | 248 | 3396 | 3430 | 0.99 | Sym  |
| SOX9 KO | 249 | 1885 | 503  | 3.75 | Asym |
| SOX9 KO | 250 | 2990 | 676  | 4.42 | Asym |
| SOX9 KO | 251 | 2507 | 1671 | 1.5  | Sym  |
| SOX9 KO | 252 | 2878 | 1345 | 2.14 | Asym |
| SOX9 KO | 253 | 2660 | 468  | 5.68 | Asym |
| SOX9 KO | 254 | 1949 | 1611 | 1.21 | Sym  |
| SOX9 KO | 255 | 2043 | 619  | 3.3  | Asym |
| SOX9 KO | 256 | 2999 | 1214 | 2.47 | Asym |
| SOX9 KO | 257 | 2672 | 507  | 5.27 | Asym |
| SOX9 KO | 258 | 3220 | 1063 | 3.03 | Asym |
| SOX9 KO | 259 | 2447 | 551  | 4.44 | Asym |
| SOX9 KO | 260 | 3158 | 579  | 5.45 | Asym |
| SOX9 KO | 261 | 2794 | 570  | 4.9  | Asym |
| SOX9 KO | 262 | 2880 | 2182 | 1.32 | Sym  |
| SOX9 KO | 263 | 2558 | 565  | 4.53 | Asym |
| SOX9 KO | 264 | 3197 | 555  | 5.76 | Asym |
| SOX9 KO | 265 | 2318 | 2390 | 0.97 | Sym  |
| SOX9 KO | 266 | 3385 | 2052 | 1.65 | Sym  |
| SOX9 KO | 267 | 2348 | 958  | 2.45 | Asym |
| SOX9 KO | 268 | 2143 | 1499 | 1.43 | Sym  |
| SOX9 KO | 269 | 3078 | 643  | 4.79 | Asym |
| SOX9 KO | 270 | 3121 | 581  | 5.37 | Asym |
| SOX9 KO | 271 | 2164 | 478  | 4.53 | Asym |
| SOX9 KO | 272 | 2947 | 1991 | 1.48 | Sym  |
| SOX9 KO | 273 | 2880 | 3470 | 0.83 | Sym  |
| SOX9 KO | 274 | 3435 | 1112 | 3.09 | Asym |
| SOX9 KO | 275 | 2817 | 1548 | 1.82 | Sym  |
| SOX9 KO | 276 | 2999 | 578  | 5.19 | Asym |
| SOX9 KO | 277 | 1973 | 486  | 4.06 | Asym |
| SOX9 KO | 278 | 1995 | 525  | 3.8  | Asym |
| SOX9 KO | 279 | 3217 | 1313 | 2.45 | Asym |
| SOX9 KO | 280 | 3409 | 589  | 5.79 | Asym |
| SOX9 KO | 281 | 3385 | 2334 | 1.45 | Sym  |
| SOX9 KO | 282 | 3168 | 578  | 5.48 | Asym |
| SOX9 KO | 283 | 2152 | 480  | 4.48 | Asym |
| SOX9 KO | 284 | 2487 | 1764 | 1.41 | Sym  |
| SOX9 KO | 285 | 2264 | 1470 | 1.54 | Sym  |
| SOX9 KO | 286 | 2814 | 763  | 3.69 | Asym |
| SOX9 KO | 287 | 2426 | 967  | 2.51 | Asym |

|         |     |      |      |      |      |
|---------|-----|------|------|------|------|
| SOX9 KO | 289 | 2123 | 367  | 5.79 | Asym |
| SOX9 KO | 290 | 2325 | 1845 | 1.26 | Sym  |
| SOX9 KO | 291 | 3159 | 2149 | 1.47 | Sym  |
| SOX9 KO | 292 | 2239 | 468  | 4.78 | Asym |
| SOX9 KO | 293 | 3266 | 628  | 5.2  | Asym |
| SOX9 KO | 294 | 2537 | 471  | 5.39 | Asym |
| SOX9 KO | 295 | 1967 | 739  | 2.66 | Asym |
| SOX9 KO | 296 | 2301 | 465  | 4.95 | Asym |
| SOX9 KO | 297 | 3444 | 2359 | 1.46 | Sym  |
| SOX9 KO | 298 | 2432 | 619  | 3.93 | Asym |
| SOX9 KO | 299 | 2166 | 744  | 2.91 | Asym |
| SOX9 KO | 300 | 2978 | 3463 | 0.86 | Sym  |
| SOX9 KO | 301 | 2597 | 1882 | 1.38 | Sym  |
| SOX9 KO | 302 | 1880 | 2112 | 0.89 | Sym  |
| SOX9 KO | 303 | 2324 | 571  | 4.07 | Asym |
| SOX9 KO | 304 | 2215 | 879  | 2.52 | Asym |
| SOX9 KO | 305 | 3367 | 626  | 5.38 | Asym |
| SOX9 KO | 306 | 2813 | 2813 | 1    | Sym  |
| SOX9 KO | 307 | 3414 | 575  | 5.94 | Asym |
| SOX9 KO | 308 | 3052 | 681  | 4.48 | Asym |
| SOX9 KO | 309 | 2147 | 364  | 5.9  | Asym |
| SOX9 KO | 310 | 3224 | 1966 | 1.64 | Sym  |
| SOX9 KO | 311 | 2489 | 2146 | 1.16 | Sym  |
| SOX9 KO | 312 | 2268 | 1482 | 1.53 | Sym  |
| SOX9 KO | 313 | 2270 | 532  | 4.27 | Asym |
| SOX9 KO | 314 | 2698 | 2286 | 1.18 | Sym  |
| SOX9 KO | 315 | 3302 | 938  | 3.52 | Asym |
| SOX9 KO | 316 | 2255 | 688  | 3.28 | Asym |
| SOX9 KO | 317 | 2508 | 1754 | 1.43 | Sym  |
| SOX9 KO | 318 | 1979 | 333  | 5.95 | Asym |
| SOX9 KO | 319 | 2919 | 1813 | 1.61 | Sym  |
| SOX9 KO | 320 | 1998 | 1665 | 1.2  | Sym  |
| SOX9 KO | 321 | 2600 | 699  | 3.72 | Asym |
| SOX9 KO | 322 | 3411 | 2030 | 1.68 | Sym  |
| SOX9 KO | 323 | 2077 | 453  | 4.59 | Asym |
| SOX9 KO | 324 | 2005 | 719  | 2.79 | Asym |
| SOX9 KO | 325 | 2828 | 3288 | 0.86 | Sym  |
| SOX9 KO | 326 | 1964 | 569  | 3.45 | Asym |
| SOX9 KO | 327 | 3001 | 503  | 5.97 | Asym |
| SOX9 KO | 328 | 2570 | 2274 | 1.13 | Sym  |
| SOX9 KO | 329 | 1970 | 1515 | 1.3  | Sym  |
| SOX9 KO | 330 | 2268 | 986  | 2.3  | Asym |
| SOX9 KO | 331 | 2868 | 2109 | 1.36 | Sym  |
| SOX9 KO | 332 | 3231 | 921  | 3.51 | Asym |
| SOX9 KO | 333 | 3148 | 621  | 5.07 | Asym |
| SOX9 KO | 334 | 2091 | 1413 | 1.48 | Sym  |
| SOX9 KO | 335 | 3431 | 3036 | 1.13 | Sym  |
| SOX9 KO | 336 | 3458 | 2071 | 1.67 | Sym  |
| SOX9 KO | 337 | 3091 | 611  | 5.06 | Asym |
| SOX9 KO | 338 | 3436 | 1909 | 1.8  | Sym  |
| SOX9 KO | 339 | 2905 | 1002 | 2.9  | Asym |
| SOX9 KO | 340 | 2073 | 776  | 2.67 | Asym |
| SOX9 KO | 341 | 2216 | 511  | 4.34 | Asym |
| SOX9 KO | 342 | 2104 | 1559 | 1.35 | Sym  |
| SOX9 KO | 343 | 3376 | 675  | 5    | Asym |
| SOX9 KO | 344 | 2143 | 515  | 4.16 | Asym |
| SOX9 KO | 345 | 3035 | 1029 | 2.95 | Asym |

|         |     |      |      |      |      |
|---------|-----|------|------|------|------|
| SOX9 KO | 347 | 1867 | 791  | 2.36 | Asym |
| SOX9 KO | 348 | 2934 | 1298 | 2.26 | Asym |
| SOX9 KO | 349 | 1942 | 641  | 3.03 | Asym |
| SOX9 KO | 350 | 2276 | 2557 | 0.89 | Sym  |
| SOX9 KO | 351 | 2768 | 1600 | 1.73 | Sym  |
| SOX9 KO | 352 | 2657 | 970  | 2.74 | Asym |
| SOX9 KO | 353 | 3078 | 1202 | 2.56 | Asym |
| SOX9 KO | 354 | 3325 | 1127 | 2.95 | Asym |
| SOX9 KO | 355 | 2306 | 1830 | 1.26 | Sym  |
| SOX9 KO | 356 | 2922 | 1207 | 2.42 | Asym |
| SOX9 KO | 357 | 3055 | 1934 | 1.58 | Sym  |
| SOX9 KO | 358 | 3395 | 605  | 5.61 | Asym |
| SOX9 KO | 359 | 3237 | 1713 | 1.89 | Sym  |
| SOX9 KO | 360 | 2930 | 2325 | 1.26 | Sym  |
| SOX9 KO | 361 | 3055 | 934  | 3.27 | Asym |
| SOX9 KO | 362 | 2621 | 904  | 2.9  | Asym |
| SOX9 KO | 363 | 1960 | 875  | 2.24 | Asym |
| SOX9 KO | 364 | 2161 | 363  | 5.95 | Asym |
| SOX9 KO | 365 | 2479 | 497  | 4.99 | Asym |
| SOX9 KO | 366 | 2605 | 544  | 4.79 | Asym |
| SOX9 KO | 367 | 2490 | 2830 | 0.88 | Sym  |
| SOX9 KO | 368 | 3437 | 693  | 4.96 | Asym |
| SOX9 KO | 369 | 3467 | 2375 | 1.46 | Sym  |
| SOX9 KO | 370 | 2041 | 1633 | 1.25 | Sym  |
| SOX9 KO | 371 | 3064 | 2236 | 1.37 | Sym  |
| SOX9 KO | 372 | 3152 | 1668 | 1.89 | Sym  |
| SOX9 KO | 373 | 2003 | 415  | 4.83 | Asym |
| SOX9 KO | 374 | 2855 | 1133 | 2.52 | Asym |
| SOX9 KO | 375 | 2669 | 1076 | 2.48 | Asym |
| SOX9 KO | 376 | 2915 | 3005 | 0.97 | Sym  |
| SOX9 KO | 377 | 3411 | 886  | 3.85 | Asym |
| SOX9 KO | 378 | 3119 | 1824 | 1.71 | Sym  |
| SOX9 KO | 379 | 2338 | 649  | 3.6  | Asym |
| SOX9 KO | 380 | 1950 | 441  | 4.42 | Asym |
| SOX9 KO | 381 | 2780 | 825  | 3.37 | Asym |
| SOX9 KO | 382 | 3040 | 924  | 3.29 | Asym |
| SOX9 KO | 383 | 2047 | 660  | 3.1  | Asym |
| SOX9 KO | 384 | 2570 | 1962 | 1.31 | Sym  |
| SOX9 KO | 385 | 3343 | 557  | 6    | Asym |
| SOX9 KO | 386 | 2127 | 650  | 3.27 | Asym |
| SOX9 KO | 387 | 2203 | 979  | 2.25 | Asym |
| SOX9 KO | 388 | 2312 | 1217 | 1.9  | Sym  |
| SOX9 KO | 389 | 3126 | 1461 | 2.14 | Asym |
| SOX9 KO | 390 | 2029 | 372  | 5.46 | Asym |
| SOX9 KO | 391 | 2176 | 491  | 4.43 | Asym |
| SOX9 KO | 392 | 1828 | 459  | 3.98 | Asym |
| SOX9 KO | 393 | 3145 | 1210 | 2.6  | Asym |
| SOX9 KO | 394 | 2846 | 1143 | 2.49 | Asym |
| SOX9 KO | 395 | 2447 | 1786 | 1.37 | Sym  |
| SOX9 KO | 396 | 2490 | 565  | 4.41 | Asym |
| SOX9 KO | 397 | 1872 | 755  | 2.48 | Asym |
| SOX9 KO | 398 | 2777 | 731  | 3.8  | Asym |
| SOX9 KO | 399 | 2992 | 656  | 4.56 | Asym |
| SOX9 KO | 400 | 2753 | 1047 | 2.63 | Asym |
